# Supplementary material for: Repeat screening for syphilis in pregnancy as an alternative screening strategy in the UK: a cost-effectiveness analysis
Source: PubMed Central journal article supplement — BMJ Open. 2020 Nov 19;10(11):e038505. doi: 10.1136/bmjopen-2020-038505 (PMC7678359; doi:10.1136/bmjopen-2020-038505), 2020-11-19

# BMJ Open

BMJ Open is committed to open peer review. As part of this commitment we make the peer review history of every article we publish publicly available.

When an article is published we post the peer reviewers' comments and the authors' responses online. We also post the versions of the paper that were used during peer review. These are the versions that the peer review comments apply to.

The versions of the paper that follow are the versions that were submitted during the peer review process. They are not the versions of record or the final published versions. They should not be cited or distributed as the published version of this manuscript.

BMJ Open is an open access journal and the full, final, typeset and author-corrected version of record of the manuscript is available on our site with no access controls, subscription charges or pay-per-view fees (<http://bmjopen.bmj.com>).

If you have any questions on BMJ Open's open peer review process please email [info.bmjopen@bmj.com](mailto:info.bmjopen@bmj.com)

# BMJ Open

## Repeat screening for syphilis in pregnancy as an alternative screening strategy in the United Kingdom: a cost-effectiveness analysis.

|                               |                                                                                                                                                                                                                                                                                                                                                                                                                                                                                                                                                                                                                                                                                                                                            |
|-------------------------------|--------------------------------------------------------------------------------------------------------------------------------------------------------------------------------------------------------------------------------------------------------------------------------------------------------------------------------------------------------------------------------------------------------------------------------------------------------------------------------------------------------------------------------------------------------------------------------------------------------------------------------------------------------------------------------------------------------------------------------------------|
| Journal:                      | <i>BMJ Open</i>                                                                                                                                                                                                                                                                                                                                                                                                                                                                                                                                                                                                                                                                                                                            |
| Manuscript ID                 | bmjopen-2020-038505                                                                                                                                                                                                                                                                                                                                                                                                                                                                                                                                                                                                                                                                                                                        |
| Article Type:                 | Original research                                                                                                                                                                                                                                                                                                                                                                                                                                                                                                                                                                                                                                                                                                                          |
| Date Submitted by the Author: | 16-Mar-2020                                                                                                                                                                                                                                                                                                                                                                                                                                                                                                                                                                                                                                                                                                                                |
| Complete List of Authors:     | Huntington, Susie; Aquarius Population Health Limited<br>Weston, Georgie; Aquarius Population Health Limited<br>Seedat, Farah; UK National Screening Committee Public Health England<br>Floor 5, Wellington House 133-155 Waterloo Road London, UK SE1 8UG<br>Marshall, John; UK National Screening Committee,<br>Bailey, Heather; University College London, UCL Institute for Global<br>Health<br>Tebruegge, Marc; Evelina London Children's Hospital, Department of<br>Paediatric Infectious Diseases & Immunology; Royal Children's Hospital<br>Melbourne, Department of Paediatrics<br>Ahmed, Imtyaz; Aquarius Population Health Limited<br>Turner, Katy; K Turner Consulting<br>Adams, Elisabeth; Aquarius Population Health Limited |
| Keywords:                     | HEALTH ECONOMICS, Health policy < HEALTH SERVICES<br>ADMINISTRATION & MANAGEMENT, Public health < INFECTIOUS<br>DISEASES, Prenatal diagnosis < OBSTETRICS                                                                                                                                                                                                                                                                                                                                                                                                                                                                                                                                                                                  |
|                               |                                                                                                                                                                                                                                                                                                                                                                                                                                                                                                                                                                                                                                                                                                                                            |

SCHOLARONE™  
Manuscripts

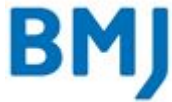

I, the Submitting Author has the right to grant and does grant on behalf of all authors of the Work (as defined in the below author licence), an exclusive licence and/or a non-exclusive licence for contributions from authors who are: i) UK Crown employees; ii) where BMJ has agreed a CC-BY licence shall apply, and/or iii) in accordance with the terms applicable for US Federal Government officers or employees acting as part of their official duties; on a worldwide, perpetual, irrevocable, royalty-free basis to BMJ Publishing Group Ltd ("BMJ") its licensees and where the relevant Journal is co-owned by BMJ to the co-owners of the Journal, to publish the Work in this journal and any other BMJ products and to exploit all rights, as set out in our [licence](#).

The Submitting Author accepts and understands that any supply made under these terms is made by BMJ to the Submitting Author unless you are acting as an employee on behalf of your employer or a postgraduate student of an affiliated institution which is paying any applicable article publishing charge ("APC") for Open Access articles. Where the Submitting Author wishes to make the Work available on an Open Access basis (and intends to pay the relevant APC), the terms of reuse of such Open Access shall be governed by a Creative Commons licence – details of these licences and which [Creative Commons](#) licence will apply to this Work are set out in our licence referred to above.

Other than as permitted in any relevant BMJ Author's Self Archiving Policies, I confirm this Work has not been accepted for publication elsewhere, is not being considered for publication elsewhere and does not duplicate material already published. I confirm all authors consent to publication of this Work and authorise the granting of this licence.

1  
2  
3 **Repeat screening for syphilis in pregnancy as an alternative screening strategy in the United**  
4 **Kingdom: a cost-effectiveness analysis**  
5

6  
7  
8 Susie Huntington<sup>1</sup>, Georgie Weston<sup>1</sup>, Farah Seedat<sup>2</sup>, John Marshall<sup>2</sup>, Heather Bailey<sup>3</sup>, Marc  
9 Tebruegge<sup>4-6</sup>, Imtyaz Ahmed<sup>1</sup>, Katy Turner<sup>7</sup>, Elisabeth Adams<sup>1</sup>.  
10  
11

- 12 1. Aquarius Population Health Limited, London, UK
  - 13 2. UK National Screening Committee, Floor 5, Wellington House, 133-155 Waterloo Road, London,  
14 SE1 8UG, UK
  - 15 3. UCL Institute for Global Health, London, UK
  - 16 4. Department of Paediatric Infectious Diseases & Immunology, Evelina London Children's Hospital,  
17 Guy's and St. Thomas' NHS Foundation Trust, London, UK.
  - 18 5. Department of Paediatrics, Royal Children's Hospital Melbourne, University of Melbourne,  
19 Melbourne, Australia.
  - 20 6. Department of Infection, Immunity & Inflammation, UCL Great Ormond Street Institute of Child  
21 Health, University College London, London, UK.
  - 22 7. K Turner Consulting, Bath UK.
- 23  
24  
25  
26  
27  
28  
29  
30  
31

32 Author's ORCID IDs: SH 0000-0002-2854-7441; GW 0000-0003-3019-7150; FS 0000-0002-3563-7875;  
33 JM 0000-0002-6239-774X; HB 0000-0003-3266-1041; KT 0000-0002-8152-6017.  
34  
35  
36

37 Correspondence: Dr Susie Huntington. Aquarius Population Health Limited, Unit 29 Tileyard Studios,  
38 London, N7 9AH, UK. susie.huntington@aquariusph.com  
39  
40  
41  
42  
43

44 **Word count: 4000.**  
45  
46  
47  
48  
49  
50  
51  
52  
53  
54  
55  
56  
57  
58  
59  
60

## Abstract

**Objectives:** To assess the cost-effectiveness of universal repeat screening for syphilis in late pregnancy, compared with the current strategy of single screening in early pregnancy with repeat screening offered only to high-risk women.

**Design:** A decision tree model was developed to assess the incremental costs and health benefits of the two screening strategies. The base case analysis considered short-term costs during pregnancy and the initial weeks after delivery. Deterministic and probabilistic sensitivity analyses and scenario analyses were conducted to assess the robustness of the results.

**Setting:** UK antenatal screening programme.

**Population:** Hypothetical cohort of pregnant women who access antenatal care and receive a syphilis screen in one year.

**Primary and secondary outcome measures:** The primary outcome was the cost to avoid one case of congenital syphilis (CS). Secondary outcomes were the cost to avoid one case of intrauterine fetal demise (IUFD) or neonatal death and the number of women needing to be screened/treated to avoid one case of CS, IUFD or neonatal death. The cost per quality-adjusted life year (QALY) gained was assessed in scenario analyses.

**Results:** Base case results indicated that for pregnant women in the UK (n=725,891), the repeat screening strategy would result in 5.5 fewer cases of CS (from 8.8 to 3.3), 0.1 fewer cases of neonatal death, and 0.3 fewer cases of IUFD annually compared to the single screening strategy. This equates to an additional £1.8 million per case of CS prevented. When lifetime horizon was considered, the incremental cost-effectiveness ratio (ICER) for the repeat screening strategy was £120,494.

**Conclusions:** Universal repeat screening for syphilis in pregnancy is unlikely to be cost-effective in the current UK setting where syphilis prevalence is low. Repeat screening may be cost-effective in countries with a higher syphilis incidence in pregnancy, particularly if the cost per screen is low.

### Strengths and limitations of this study

- This is the first health economic analysis to assess the cost-effectiveness of repeat screening strategy for syphilis in pregnancy compared to the single screen strategy within the UK setting.
- Experts provided input to inform the model inputs and validate the model structure and assumptions.
- Extensive sensitivity analyses were performed to assess uncertainty in the results.
- A lack of long-term data on the costs and utilities associated with congenital syphilis meant the focus of the analysis was on the short-term costs and health benefits, with the incremental cost-effectiveness ratio (ICER) being calculated in scenario analyses.

## Introduction

Syphilis is a bacterial sexually transmitted infection (STI) caused by *Treponema pallidum* subspecies *pallidum*. The prevalence of syphilis in the UK is low, however, the number of new diagnoses has increased over the last decade. In women, the number of cases rose from 345 in 2009 to 550 in 2018 [1].

Congenital syphilis (CS) occurs via vertical transmission of syphilis during pregnancy which can occur during any trimester and at any of the four stages of syphilis infection. The highest risk of transmission, however, occurs in primary syphilis when sores or chancres are present. Adverse pregnancy outcomes can include intrauterine fetal demise (IUFD), prematurity and neonatal death, with the risk being considerably higher in women with untreated syphilis than in pregnant women with no syphilis or in pregnant women who receive adequate treatment for syphilis following diagnosis at first trimester screening [2]. The risk of CS is difficult to quantify due to the small number of cases, the wide range of disease presentations and probable underdiagnosis. There is evidence, albeit limited, that the risk of CS is higher if women become infected whilst pregnant than if they have active syphilis at the time of conception [2,3]. In infants born with CS, the infection can cause reduced growth and development, neurological impairment, bone deformities, and hearing loss [4,5]. Infants treated with intravenous benzylpenicillin sodium in the first two months of life are reported to have a good short-term prognosis, but long-term outcomes have not been investigated in detail [6,7].

In the UK, routine antenatal screening for syphilis, hepatitis B and human immunodeficiency virus (HIV) is offered to all pregnant women at their first routine antenatal appointment, usually before 12 weeks gestation, or later, for the small proportion of women who first present in their second or third trimester [8,9]. Women who decline screening are formally re-offered and screening coverage currently exceeds 99.6% [9–11]. Blood samples are initially tested using an enzyme immunoassay (EIA) with a *T. pallidum* particle agglutination assay (TPPA) performed on the same specimen to confirm a positive result. Women with a positive TPPA result are referred to a sexual health clinic to assess whether they have an active infection which requires treatment or a previous infection not requiring treatment. It is possible that women who screen negative for syphilis become positive later in pregnancy, either because they become infected with syphilis, or because their infection was too recent for a detectable antibody response to have been mounted at the time of the first screen. Management guidelines, outside the national screening programme, recommend that women are offered repeat testing for syphilis in late pregnancy if they have been diagnosed and treated for syphilis in the first trimester, if they consider themselves to be at risk of infection, or have a single

1  
2  
3 'high-risk' exposure [11,12]. Assessing women's risk can be problematic and risk can change during  
4 pregnancy. Data on coverage of repeat testing or management is not routinely collected. In 2011-13,  
5 the Surveillance of Antenatal Syphilis Screening (SASS) study was conducted to provide quantitative  
6 data on the performance of the screening pathway [13].  
7  
8  
9

10 Syphilis prevalence in pregnant women is low, the SASS study found that 0.04% (1/2800) of pregnant  
11 women required treatment for syphilis in 2010-2011, although the prevalence may have  
12 subsequently increased [13]. CS incidence is also low and below the WHO elimination threshold of  
13  $\leq 0.5/1000$  [14]. However, between March 2016 and January 2017, four cases of CS occurred in the  
14 UK in women who screened negative for syphilis in pregnancy [15]. None of whom had a repeat  
15 screen during pregnancy, and confirmatory testing later showed that they had acquired syphilis  
16 whilst pregnant. These infections would likely have been diagnosed and treated if repeat screening  
17 in late pregnancy was offered to all pregnant women, an approach that has not been assessed in the  
18 UK. Two models assessed the cost-effectiveness of universal repeat screening in the US, where the  
19 prevalence of syphilis in pregnant women is higher than in the UK. One found that universal repeat  
20 screening was cost saving [16], whilst the other found that it cost \$419,842 per CS case avoided [17].  
21  
22  
23  
24  
25  
26  
27  
28  
29

30 To inform the UK National Screening Committee (UK NSC) and in response to an increase in syphilis  
31 diagnoses in the UK and the continued occurrence of CS cases each year, albeit very small numbers,  
32 the clinical and cost-effectiveness of universal screening in the first and third trimesters, as an  
33 alternative strategy to universal screening in the first trimester only, was assessed.  
34  
35  
36  
37  
38  
39  
40  
41  
42  
43  
44  
45  
46  
47  
48  
49  
50  
51  
52  
53  
54  
55  
56  
57  
58  
59  
60



## Methods

### Model structure

A decision tree model in TreeAge (TreeAge Pro 2019, R2. TreeAge Software, Williamstown, MA, USA) was developed to assess the incremental costs and health benefits of universal repeat screening for antenatal syphilis compared with universal screening in the first trimester only (**Figure 1**). For both screening strategies, the decision tree followed the true disease state of women and the population was split into women screened in the first/second trimester and women screened in the third trimester (i.e. late presenters who would miss the opportunity for repeat screening). Women with a positive result received treatment at a sexual health clinic plus any additional testing required. Each branch (with or without syphilis) ended with the same pregnancy outcomes: IUFD or no IUFD, the latter resulting in a preterm or term delivery and either neonatal death, an infant with CS, or an infant with no CS (online supplement **Figure S1**).

### Figure 1. Overview of decision tree comparing single screening with universal repeat screening of syphilis in pregnancy

Footnote:

PW, pregnant women; FN, false negative result; FP, false positive result; TN, true negative result; TP, true positive result.

With reference to the timing of 1<sup>st</sup> syphilis screen, 'early' refers to 1<sup>st</sup> or 2<sup>nd</sup> trimester and 'late' refers to the third trimester.

Where branches split, the probabilities are shown in the top branch, with # indicating (1-probability). Blue circle indicates referral to specialist management for treatment and the same seven pregnancy outcomes (as is shown in the topmost branch). Each branch ends with the same outcomes, but with different probabilities for each branch. Pregnancy outcomes are presented in **Figure S1** in online supplement.

1  
2  
3 The model included pregnant women in the UK who accessed antenatal care and received a syphilis  
4 screen in 2018 (the latest available data at the time). Pregnant women who were not screened  
5 (0.04%) were not included, since any change to the screening strategy would have no impact on  
6 their outcomes. Costs were considered from the UK healthcare system perspective. Social care costs  
7 were not included in the short-term. To assess the overall impact of the two screening strategies,  
8 the costs for all pregnancy outcomes for all women screened were considered, not just costs for  
9 women with syphilis. The model threshold for early versus late first screen was 28 weeks gestation,  
10 i.e. the start of the third trimester. The time horizon for the base case analysis considered short-  
11 term costs during pregnancy and the perinatal period. Lifetime costs and utilities were not used in  
12 the base case analysis (but were considered in scenario analysis) as the data available on the long-  
13 term costs and utilities associated with CS were limited and include too much uncertainty to provide  
14 a robust result. See **Table S1** for base case model assumptions.  
15  
16  
17  
18  
19  
20  
21  
22  
23  
24  
25

## 26 **Model parameters**

27  
28 Data were sought using PubMed, Google Scholar, online searches, references within papers, from  
29 experts and laboratory contacts and by data request to Public Health Agencies.  
30  
31  
32  
33

### 34 Clinical parameters

35  
36 Key clinical parameters were derived from published data and national surveillance data. Where  
37 data were only available from outside the UK, they were scaled to reflect UK pregnancy outcomes  
38 and syphilis prevalence. See **Table 1** for clinical parameters and methods of estimation.  
39  
40 Furthermore, data from a large meta-analysis [18] were adjusted to the UK setting to estimate the  
41 probability of each pregnancy outcome (online supplement **Tables S2-S5**).  
42  
43  
44  
45  
46  
47

### 48 Cost parameters

49  
50 Cost parameters are presented in **Table 1**. National Health Service (NHS) tariff costs or published  
51 costs from the UK were used where possible. Where no UK data were available, micro-costing was  
52 used to calculate costs - informed by clinical guidelines, expert opinion and incorporating published  
53 NHS costs and tariffs where possible. To estimate the additional lifetime cost of CS, cost estimates  
54 from outside the UK were converted to pound sterling (£) [19]. Where necessary, costs were inflated  
55 to 2017/18 prices using mid-year conversion rates [20].  
56  
57  
58  
59  
60

**Table 1. Clinical and cost parameters for model comparing single screening with universal repeat screening of syphilis in pregnancy in the UK**

|                                                                    | Baseline value | Low       | High    | Distribution | Note                                                                                                                                                                                                                                                                                                                       |
|--------------------------------------------------------------------|----------------|-----------|---------|--------------|----------------------------------------------------------------------------------------------------------------------------------------------------------------------------------------------------------------------------------------------------------------------------------------------------------------------------|
| <b>Clinical parameters</b>                                         |                |           |         |              |                                                                                                                                                                                                                                                                                                                            |
| Total number of women in model (representing one-year)             | 725,891        | -         | -       | -            | Based on number of deliveries in the UK in 2017/2018 and the screening uptake. See <b>Table S6</b> .                                                                                                                                                                                                                       |
| Probability of having syphilis at the start of pregnancy           | 0.00035        | 0.00028   | 0.00042 | Beta         | Data derived from 2011 SASS data [13] (England only [244/691,494]). Assume same risk in other UK countries.                                                                                                                                                                                                                |
| Probability of becoming infected with syphilis during pregnancy    | 0.000017       | 0.0000017 | 0.00012 | Beta         | Incidence was estimated using published incidence and prevalence data from United States scaled to reflect UK prevalence [13,21].                                                                                                                                                                                          |
| Probability of receiving syphilis screen before 28 weeks gestation | 0.947          | 0.936     | 0.984   | Beta         | Estimate based on gestational week at first antenatal attendance. <b>Table S7</b> in online supplement. The low value is in line with results from SASS study [13]. The high value is in line with data from Northern Ireland which (from the UK countries) has the highest proportion of women attending before 28 weeks. |
| Probability of true positive result                                | 0.995          | 0.984     | 1.00    | Beta         | Based on the average test sensitivity of EIA assays used in the UK. High and low values are based on best and worst test performance of assays used in the UK [22,23].                                                                                                                                                     |
| Probability of false negative result <sup>1</sup>                  | 0.005          | 0.016     | 0.00    | Beta         | Based on the average test sensitivity of EIA assays used in the UK. High and low values are based on best and worst test performance of assays used in the UK [22,23].                                                                                                                                                     |
| Probability of true negative result                                | 0.998          | 0.999     | 0.99    | Beta         | Based on average test specificity of EIA assays (99.8%) used in the UK. High and low are estimates [22,23].                                                                                                                                                                                                                |
| Probability of false positive result <sup>1</sup>                  | 0.002          | 0.001     | 0.01    | Beta         | Based on average test specificity of EIA assays (99.8%) used in the UK. High and low are estimates [22,23].                                                                                                                                                                                                                |
| <b>Cost parameters</b>                                             |                |           |         |              |                                                                                                                                                                                                                                                                                                                            |
| Syphilis screen                                                    | 13.36          | 6.68      | 26.72   | Gamma        | Estimated using micro-costing. Screening is performed at the same time as other antenatal blood tests – this would also be the case for repeat screening at 28 weeks gestation. See <b>Table S8</b> .                                                                                                                      |

|                                                       | Baseline value | Low      | High     | Distribution | Note                                                                                                                                                                                                                                                                            |
|-------------------------------------------------------|----------------|----------|----------|--------------|---------------------------------------------------------------------------------------------------------------------------------------------------------------------------------------------------------------------------------------------------------------------------------|
| Management women diagnosed with syphilis in pregnancy | 314.09         | 251.27   | 376.91   | Gamma        | Clinical management by sexual health clinician estimate based on London Integrated Sexual Health Tariff [24]. See <b>Table S9</b> .                                                                                                                                             |
| Intrauterine fetal demise                             | 4,356.80       | 3,485.44 | 5228.16  | Gamma        | Estimate based on 2013/14 published estimate from UK inflated to 2017/2018 costs [25].                                                                                                                                                                                          |
| Preterm delivery                                      | 7,100.37       | 5,680.30 | 8,520.45 | Gamma        | Estimate based on UK costs for delivery at 32-33 weeks and 34-36 weeks gestation (inflated from 2010/11 costs) [26]. UK data on gestational age at delivery ( <b>Table S10</b> ) were then used to calculate the proportion of deliveries at 32-33 (28%) and 34-36 weeks (72%). |
| Term delivery (37+ weeks)                             | 2,034.62       | 1,627.69 | 2,441.54 | Gamma        | Estimate based on published cost using inflated 2010/11 UK data [26].                                                                                                                                                                                                           |
| Neonatal death                                        | 5,805.80       | 4,644.64 | 6,966.96 | Gamma        | Estimated using cost of IUFD plus additional hospital costs. See <b>Table S11</b> .                                                                                                                                                                                             |
| CS testing and treatment                              | 6,607.68       | 5,286.14 | 7,929.21 | Gamma        | Estimated using micro-costing. See <b>Table S12</b> and <b>Table S13</b> .                                                                                                                                                                                                      |
| CS neonatal screen                                    | 245.25         | 196.20   | 294.30   | Gamma        | Screening test for neonates born to women treated for syphilis in pregnancy. Estimated using micro-costing. See <b>Table S14</b> .                                                                                                                                              |
| CS lifetime healthcare cost                           | 80,423.37      | -        | -        | Gamma        | Average additional lifetime healthcare costs attributable to CS based on cost estimate for cerebral palsy (estimate from 2000) [27].                                                                                                                                            |
| CS lifetime health and social care cost               | 651,387.47     | -        | -        | Gamma        | Average additional lifetime health and social costs attributable to CS based on cost estimate for cerebral palsy (estimate from 2000) [27].                                                                                                                                     |

<sup>1</sup>These probabilities refer to the final diagnosis after all diagnostic testing plus discussion with sexual health consultant if diagnostic tests result is positive for treponemal antibodies. EIA: Enzyme immunoassay. CS, congenital syphilis. For costs, high and low values are +/- 20% of baseline values with exception of syphilis screening cost where high and low values are +/- 50%.

## Outcomes

The primary outcome was cost to avoid one case of CS. Secondary outcomes were: cost to avoid one case of IUFD or neonatal death; the number of women who need to be screened to avoid one case of CS, IUFD or neonatal death; and the number of women who need to be treated for syphilis to avoid one case of CS, IUFD or neonatal death.

## Sensitivity and scenario analyses

A univariate deterministic sensitivity analysis (DSA) was run for all probabilities and costs to determine which parameters had the greatest impact on the outcome of the model. This was done by selecting a high and low value for each input and generating outcomes. A probabilistic sensitivity analysis (PSA) using Monte Carlo simulation (1000 iterations) was used to assess the robustness of the results and calculate 95% credibility intervals (CIs) for each output using the mean and standard deviation. A beta distribution was used for clinical probability inputs, and a gamma distribution for cost inputs (**Table 1**).

As well as the base case analysis, seven scenarios were assessed to observe how changes in model assumptions and certain parameters impacted the main outcomes:

- 1) Lifetime time horizon with incremental cost-effectiveness ratio (ICER) in terms of cost per QALY as the main outcome.
- 2) Incomplete uptake of the repeat screen – where the probability of having a second screen was 99.6%, in line with the current uptake of screening in England.
- 3) Increased syphilis incidence - varying incidence at 10 intervals between the baseline and the high value used in sensitivity analysis (0.012%).
- 4) No late presentation to antenatal care – all women are screened twice in the repeat screening strategy.
- 5) 100% sensitivity and specificity of the syphilis screening process.
- 6) 100% specificity of the repeat screen (i.e. no false positives).
- 7) Examining the per screen cost required to meet NICE cost-effectiveness thresholds.

In scenario analysis 1, the lifetime healthcare and social care costs for infants born with CS were considered. Since no data on the lifetime cost of CS were available, cerebral palsy (CP) was used as a proxy as it can also lead to a range of disabilities, vary hugely in severity, and may sometimes be a result of CS. The lifetime health and social care costs of CP were taken from a single Danish study [21] adjusted to reflect UK life expectancy and gender split.

1  
2  
3 As EuroQol-5D (EQ-5D) data has not been reported for CS or CP, a utility of 0.74 for infants with CS  
4 and 1.00 for infants born with no CS was used, adapted from a 2006 study of new-born screening  
5 strategies where 0.74 was used for infants with 'mild developmental delay' [22]. These utility values  
6 were used in a similar health economic model from the US [16] and were used to calculate quality  
7 adjusted life-years (QALY). Parental HRQoL or HRQoL for the other pregnancy outcomes were not  
8 considered.  
9

10  
11  
12  
13  
14 The life expectancy of infants with CS was estimated as 70 years, in line with the estimate for CP [21]  
15 and in light of reports of CS diagnoses in a wide range of ages [23]. The life expectancy of infants  
16 with no CS was estimated as 81 years based on current UK data [24]. All costs and utilities were  
17 discounted at 3.5%, in line with NICE guidelines for England.  
18  
19  
20  
21  
22

### 23 **Patient and public involvement**

24  
25  
26 There was no patient or public involvement (PPI) in the design of the evaluation. A report outlining  
27 the model was reviewed by the UK NSC which has PPI representation and was made available for  
28 public consultation.  
29  
30  
31  
32  
33

## 34 **Results**

### 35 **Base case analysis**

36  
37  
38  
39 The base case results indicate that in one year of screening pregnant women in the UK (n=725,891),  
40 the repeat screening strategy would result in 5.5 fewer cases of CS, 2 fewer cases of preterm  
41 delivery, 0.1 fewer cases of neonatal death (i.e. one less neonatal death every 10 years on average),  
42 and 0.3 fewer cases of IUFD compared to the single screening strategy (**Table 2**).  
43  
44  
45

46  
47 The healthcare costs would be £9,886,863 higher for the repeat screening strategy (£1,777,469,008  
48 vs. £1,787,355,870 respectively when total annual screening costs, treatment costs, and delivery  
49 costs for all pregnant women screened were considered) with most of this increase (£9,162,355)  
50 being a result of the additional screening costs (**Table 3**).  
51  
52  
53  
54  
55  
56  
57  
58  
59  
60

**Table 2. Base case clinical outcomes for model comparing universal repeat screening of syphilis in late pregnancy with single screening**

| Screening strategy                | Syphilis antenatal screens | Women treated for syphilis | False positive maternal syphilis | Intrauterine fetal demise (all causes) <sup>1</sup> | Preterm deliveries (all causes) <sup>1</sup> | Neonatal deaths (all causes) <sup>1</sup> | Congenital syphilis cases |
|-----------------------------------|----------------------------|----------------------------|----------------------------------|-----------------------------------------------------|----------------------------------------------|-------------------------------------------|---------------------------|
| <b>Existing: single screen</b>    |                            |                            |                                  |                                                     |                                              |                                           |                           |
| Estimate                          | 725,891                    | 1,705                      | 1,451                            | 2,904.4                                             | 54,228                                       | 1,446.5                                   | 8.8                       |
| 95% CI <sup>2</sup>               | 725,891-725,891            | 1,698-1,737                | 1,443-1,482                      | 2,890-2,916                                         | 53,905-54,282                                | 1,441-1,457                               | 8.7-8.9                   |
| <b>Alternative: repeat screen</b> |                            |                            |                                  |                                                     |                                              |                                           |                           |
| Estimate                          | 1,411,696                  | 3,089                      | 2,823                            | 2,904.1                                             | 54,226                                       | 1,446.4                                   | 3.3                       |
| 95% CI <sup>2</sup>               | 1,411,456-1,411,503        | 3,074-3,150                | 2,806-2,883                      | 2,889-2,915                                         | 53,903-54,280                                | 1,441-1,457                               | 3.3-3.3                   |
| <b>Difference</b>                 | <b>685,805</b>             | <b>1,384</b>               | <b>1,372</b>                     | <b>-0.3</b>                                         | <b>-2</b>                                    | <b>-0.1</b>                               | <b>-5.5</b>               |

<sup>1</sup>These adverse pregnancy outcomes are all-cause outcomes for all 725,891 women screened, including the small number with syphilis infection.

<sup>2</sup>95% CI, confidence intervals calculated using probabilistic sensitivity analysis.

**Table 3. Base case short-term annual healthcare costs from model comparing universal repeat screening of syphilis in late pregnancy with single screening**

| Screening strategy                | Total healthcare costs | Cost breakdown <sup>1</sup>  |                                                       |                                       |
|-----------------------------------|------------------------|------------------------------|-------------------------------------------------------|---------------------------------------|
|                                   |                        | Antenatal syphilis screening | Syphilis treatment (in pregnant women found positive) | Perinatal costs (for all pregnancies) |
| <b>Existing: single screen</b>    |                        |                              |                                                       |                                       |
| Estimate                          | £ 1,777,469,008        | £ 9,697,904                  | £ 535,434                                             | £ 1,767,235,670                       |
| Lower 95% CI                      | £ 1,769,393,140        | £ 9,661,636                  | £ 532,820                                             | £ 1,759,111,560                       |
| Upper 95% CI                      | £ 1,778,772,048        | £ 9,822,870                  | £ 545,591                                             | £ 1,768,490,710                       |
| <b>Alternative: repeat screen</b> |                        |                              |                                                       |                                       |
| Estimate                          | £ 1,787,355,870        | £ 18,860,259                 | £ 970,254                                             | £ 1,767,525,357                       |
| Lower 95% CI                      | £ 1,779,322,118        | £ 18,786,836                 | £ 964,636                                             | £ 1,759,402,583                       |
| Upper 95% CI                      | £ 1,788,703,813        | £ 19,100,346                 | £ 989,342                                             | £ 1,768,782,187                       |
| Cost difference                   | £ 9,886,863            | £ 9,162,355                  | £ 434,820                                             | £ 289,687                             |

<sup>1</sup> Costs to the NHS in the UK for all 725,891 pregnant women screened. Costs are spilt into 1) antenatal screening costs, which includes sample collection and laboratory testing; 2) syphilis treatment within sexual health clinics; and 3) perinatal costs, which includes the costs of delivery and neonatal care for all infants.



**Table 4. Requirements to prevent one outcome – from model comparing universal repeat screening of syphilis in late pregnancy with single screening**

| <b>Outcome</b>            | <b>Cost</b>  | <b>Women screened in third trimester</b> | <b>Women treated for syphilis – TP and FP</b> | <b>Additional false positives</b> |
|---------------------------|--------------|------------------------------------------|-----------------------------------------------|-----------------------------------|
| Congenital syphilis       | £ 1,791,880  | 124,294                                  | 251                                           | 249                               |
| Intrauterine fetal demise | £ 37,852,707 | 2,625,664                                | 5,300                                         | 5,251                             |
| Neonatal death            | £ 79,507,578 | 5,515,066                                | 11,133                                        | 11,030                            |

FP, false positive; TP, true positive for syphilis infection.

For peer review only

1  
2  
3 The model calculated that 124,292 women would need to be rescreened in the third trimester to  
4 prevent one case of CS, 2.6 million to prevent one case of IUFD (i.e. one case prevented  
5 approximately every 3.6 years if every pregnant woman was rescreened), and 5.5 million to prevent  
6 one case of neonatal death (i.e. one case prevented approximately every 7.6 years if every pregnant  
7 woman was rescreened, **Table 4**). It would cost an additional £1,791,880 per case of CS prevented,  
8 £37,852,707 per case of IUFD prevented, and £79,507,578 per neonatal death prevented. An  
9 additional 251 women need to receive treatment for syphilis to prevent one case of CS (**Table 4**).

### 17 **Sensitivity and scenario analyses**

18  
19 The DSA results indicated that even accounting for parameter uncertainty, the total cost of the  
20 repeat screening strategy was always higher than the cost of the single screening strategy (see  
21 **Figure S2** in online supplement for Tornado diagram). Total costs were most sensitive to changes in  
22 the per screen cost, but also to changes in the specificity of the screening process, the proportion of  
23 women first attending antenatal care before their third trimester, syphilis incidence, and the cost of  
24 syphilis treatment (**Figure S2**). In the DSA examining the impact of clinical and cost parameters on  
25 the number of CS cases, the model was most sensitive to syphilis incidence during pregnancy and  
26 the probability of CS in infants born to women infected with syphilis during pregnancy who did not  
27 receive treatment (i.e. were undiagnosed; see **Figure S3**). In all iterations in the 1,000 PSA Monte  
28 Carlo simulations, the repeat screening strategy cost more than the single screening strategy and  
29 resulted in fewer cases of CS. The incremental cost and incremental cases of CS prevented are  
30 shown online in online **Figure S4**.

31  
32 When lifetime costs and utilities were considered (Scenario 1), the health and social care cost per  
33 additional QALY gained for the repeat screening strategy (ICER) was £120,494 (see **Table S15** in  
34 online supplement). In further scenario analyses, reducing the uptake of repeat testing to 99.6% (in  
35 line with current uptake of the first screen, Scenario 2), including all women who attended antenatal  
36 care before their third trimester (i.e. no late first screen, Scenario 4), including 100% sensitivity and  
37 specificity of the screening process (Scenario 5), or including no false positives in the second screen  
38 (Scenario 6) had very little impact on the model outcomes, reducing the base case cost per CS case  
39 avoided by <10% (data not shown).

40  
41 When the probability of becoming infected with syphilis between screens was increased seven-fold  
42 to 0.00012 (Scenario 3), repeat screening resulted in 39 fewer cases of CS compared to single  
43 screening, 0.9 fewer neonatal deaths, 13 fewer preterm deliveries, and 1.8 fewer cases of IUFDs  
44 whilst the repeat strategy cost an additional £9,638,476 (**Table S16** and **S17** in online supplement).

1  
2  
3 In this scenario, the cost per CS case prevented was £247,284 (**Table S18**). **Table S19** in the online  
4 supplement presents the cost per case of CS avoided and the ICER when the probability of becoming  
5 infected with syphilis between screens is higher than baseline (at 10 intervals between 0.00003 and  
6 0.00012). As anticipated, with each increase in incidence, the repeat screening strategy resulted in  
7 more CS cases prevented and a lower cost per CS case prevented. When lifetime healthcare and  
8 social-care costs were considered, the ICER was £11,171 (below the £20-£30k threshold used by  
9 NICE), when syphilis incidence in pregnancy was 0.004% and became cost saving at an incidence of  
10 0.005% (1 in 100,000) or higher.

11  
12 Scenario 7 examined the cost per screen needed to meet NICE ICER thresholds (at the current  
13 syphilis incidence) (see supplementary material **Table S20**). The per screen cost would need to  
14 decrease from £13.36 to £6.46 to take the ICER below £30k and £5.70 to take it below £20k when  
15 lifetime health and social care costs and utilities of CS were considered.

## 26 Discussion

27  
28 We report on the cost-effectiveness of repeat universal syphilis antenatal screening in the UK. Our  
29 results indicate that this screening strategy would not be cost-effective in the current UK setting  
30 where the prevalence and incidence of syphilis among pregnant women is low. Although the repeat  
31 screening strategy is likely to result in fewer cases of CS, the number of cases prevented would be  
32 small, 5-6 a year, and would cost an additional £9.9 million, equivalent to £1.8 million per case  
33 prevented. Most of the increase in cost is a result of the additional costs related to providing the  
34 second screen rather than treatment or delivery costs for women with syphilis.

35  
36 The PSA and DSA indicated that the model results are robust to changes in the inputs. When lifetime  
37 health and social-care costs and health-related quality of life were considered (Scenario 1), the cost  
38 per QALY gained was £120,494 for the repeat screening strategy compared to the single screening  
39 strategy. This is well above the £20k-30k cost per QALY threshold that NICE uses to assess  
40 interventions, and also exceeds the £100,000 threshold used to assess drugs/interventions for rare  
41 conditions (the threshold used when the intervention results in <10 additional QALYs to an individual  
42 in their lifetime) [25].

43  
44 Only two previous economic evaluations from the United States (US) have assessed universal repeat  
45 syphilis screening in pregnancy compared to single screening in early pregnancy. Albright *et al.* found  
46 that universal third-trimester syphilis rescreening was not cost-effective, while Hersh *et al.* reported  
47 repeat screening was cost saving [17,26]. These economic evaluations did not account for late  
48  
49  
50  
51  
52  
53  
54  
55  
56  
57  
58  
59  
60

1  
2  
3 presentation to antenatal care and syphilis prevalence and incidence were considerably higher as  
4 were healthcare costs.  
5

6  
7 It is important to note that changes to the screening strategy would not change the number of  
8 adverse pregnancy outcomes in women who decline screening, in women who present late to  
9 antenatal care and have one screen but no opportunity for a repeat screen, or in women who first  
10 present at the time of delivery, thereby missing the opportunity for any antenatal screening or  
11 treatment. For this reason, and because treatment for syphilis is not universally effective at  
12 preventing adverse pregnancy outcomes, it is likely that there would continue to be a very small  
13 number of infants born with CS each year irrespective of changes made to the screening strategy.  
14  
15  
16  
17  
18  
19  
20  
21

### 22 **Strengths and weaknesses**

23  
24 This is the first health economic analysis to assess the costs and clinical benefits of a repeat  
25 screening strategy for syphilis compared to a single screen strategy within the UK setting. The input  
26 values in the model were based on the best available evidence from the published literature, UK-  
27 specific surveillance data, NHS tariffs and published costs, and with input from experts in the field  
28 where data were lacking. These inputs were rigorously tested in sensitivity and scenario analyses to  
29 add confidence to the results, despite limited data in some areas.  
30  
31  
32  
33

34  
35 There were sparse UK data available on pregnancy outcomes in women treated for syphilis or in  
36 infants born with CS. We therefore used the additional lifetime cost of CP, estimated in a study from  
37 Denmark [21], as a proxy for the lifetime cost of CS. As such, the primary focus of the analysis was  
38 the short-term costs and CS cases avoided since it was difficult to have confidence in the estimate  
39 used for lifetime CS cost.  
40  
41  
42  
43

44 The model assumed that women could not become infected with syphilis between the repeat screen  
45 and delivery. As the incidence estimate relates to the full duration of pregnancy, this assumption  
46 would overestimate the number of women diagnosed at the repeat screen and treated, therefore  
47 overestimating the benefits of the repeat screen strategy. However, the number of women who  
48 become infected with syphilis is small and thus this would likely have little impact on the overall  
49 results. Since we do not know what repeat screening coverage would be, the model assumed 100%  
50 coverage, since all women in the model had already agreed to a first screen. This is optimistic since it  
51 assumes continued engagement with antenatal services. However, scenario analysis 2 showed that  
52 even when uptake was <100% it would be unlikely to have much impact on the cost per CS case  
53 avoided.  
54  
55  
56  
57  
58  
59  
60

1  
2  
3 It was also assumed that all women and neonates diagnosed with syphilis receive the appropriate  
4 full course of treatment and all infants born to women diagnosed with syphilis in pregnancy receive  
5 syphilis testing at birth. However, the SASS study [13] found that in 2010-11, not all women  
6 diagnosed with syphilis received complete treatment and inadequate paediatric follow-up was  
7 identified as an issue. Lack of treatment in these women and neonates is likely to make the repeat  
8 screening even less cost-effective.  
9  
10  
11  
12  
13  
14  
15

### 16 **Implications for clinicians and policymakers**

17  
18 The number of CS cases was most sensitive to changes in the syphilis incidence between screens. It  
19 may be cost-effective to repeat screen for a period of time where there is a known syphilis outbreak  
20 or if there are multiple cases of CS in a short period within the same geographical area in women  
21 who tested negative for syphilis at the first screen - as this would indicate a much higher syphilis  
22 incidence in pregnancy in that area.  
23  
24  
25  
26

27 Our model focused on the UK but is relevant to other European countries with similar syphilis  
28 prevalence and healthcare costs. Our analyses, using UK cost estimates, suggest that a universal  
29 second screen in late pregnancy could become cost-effective if the incidence of syphilis in pregnancy  
30 were to increase (to 5 per 100,000 pregnant women), indicating that in countries that have far  
31 higher syphilis prevalence than the UK, a second screen could be cost saving. For example, recent  
32 estimates suggest that the prevalence of syphilis in the WHO African region is more than 10-fold  
33 higher than in the WHO European Region [27]. In such a high prevalence setting, combined with  
34 lower local healthcare costs, a second syphilis screen in late pregnancy could be cost-effective.  
35  
36  
37  
38  
39  
40

41 There could be some negative impact associated with repeat screening. A false positive result may  
42 lead to additional costs, unnecessary anxiety for mothers and their families, impact the mother's  
43 relationships, possibly even damage their confidence in the screening programme, as well as lead to  
44 overtreatment. It is vital to minimise unnecessary use of antibiotics where possible given growing  
45 concerns around antimicrobial resistance and because there is some evidence that antibiotic use in  
46 pregnancy increases the risk of childhood epilepsy, obesity, and asthma [28].  
47  
48  
49  
50

51 Alternative approaches to reduce the number of CS cases and other adverse pregnancy outcomes  
52 could be more cost-effective and should be explored. These include better targeting of high-risk  
53 individuals and sexual health promotion in pregnancy. Furthermore, of the 20 CS cases in the UK  
54 since 2010, 11 had no record of the mother receiving antenatal screening. It remains unknown  
55 whether this was because testing was refused or due to very late/no first antenatal attendance [15].  
56  
57  
58  
59  
60

1  
2  
3 This highlights the need to ensure timely screening in pregnancy, particularly in women who present  
4 late who are already at increased risk of adverse pregnancy outcomes. Education for pregnant  
5 women around sexual health and STI prevention might be cost-effective and could be considered.  
6  
7  
8  
9

### 10 11 **Unanswered questions and future research** 12

13 Our model had a single disease focus. At present however, pregnant women are screened for  
14 syphilis, HIV and hepatitis B. It would be useful to assess the potential cost-effectiveness of a repeat  
15 screen for all three infections since treatment for these infections during late pregnancy and/or at  
16 birth would reduce the risk of vertical transmission. Screening for all three infections may yield more  
17 benefits in terms of clinical outcomes and may make this strategy more cost-effective.  
18  
19

20 Furthermore, data collection including gestational week of first screen, coverage of repeat screen in  
21 high-risk women, pregnancy outcome for women treated for syphilis, stage of infection in women  
22 diagnosed with syphilis, and cost estimation for lifetime costs of being born with CS, would help  
23 inform future evaluations of screening strategies.  
24  
25  
26  
27  
28  
29

### 30 31 32 **Conclusions** 33

34 The results of this health economic analysis indicate that implementing universal repeat screening  
35 for syphilis in pregnancy is unlikely to be cost-effective in the current UK setting where the  
36 prevalence and incidence of syphilis in pregnant women is low. Repeat screening could be  
37 considered in areas with a high syphilis incidence in pregnancy and may then be cost-effective,  
38 particularly if the cost per screen were low.  
39  
40  
41  
42

43 If syphilis prevalence continues to increase, the cost-effectiveness of the repeat screening strategy  
44 should be re-examined, highlighting the importance of continued monitoring of syphilis in pregnant  
45 women, screening uptake, CS cases and long-term follow-up.  
46  
47  
48  
49  
50  
51  
52  
53  
54  
55  
56  
57  
58  
59  
60

1  
2  
3 Funding statement: This work was commissioned and funded by the UK National Screening  
4 Committee.  
5  
6  
7

8 Data Availability Statement: All data used for the model are included in either the main body of the  
9 text or in the supplementary online material.  
10  
11

12 Competing interests: SH, GW, and EA work at Aquarius Population Health and have received  
13 consultancy fees from the following companies on projects related to STIs: Abbott, Cepheid, Binx  
14 Health, Hologic and St. Georges University of London. IA, KT and MT were funded as consultants on  
15 the project through Aquarius Population Health. MT has received support from Cepheid for  
16 conference attendance. KT is in receipt of funding to University of Bristol from GlaxoSmithKline for  
17 work unrelated to this work. HB declares no competing interests.  
18  
19  
20  
21  
22

23 Author contributions: All authors contributed to developing the final model structure and data  
24 inputs and informing the micro-costing calculations. SH built the model and drafted the paper, with  
25 input from GW and FS. All authors contributed to the interpretation of the results and drafting of the  
26 final paper and have approved the final submitted version.  
27  
28  
29  
30  
31

32 We would also like to thank the following people for their contribution to this work: Nicola Bowers,  
33 Helen Fifer, Lyn Hutchison, Margaret Kingston, Anne Mackie, Paddy McMaster, Catherine Peckham,  
34 Ian Simms, Judith Timms and Sharon Webb.  
35  
36  
37  
38  
39  
40

## 41 References

- 42 1 Public Health England. Sexually transmitted infections (STIs): Annual data tables. 2014-2018.  
43 2019 [https://www.gov.uk/government/statistics/sexually-transmitted-infections-stis-annual-](https://www.gov.uk/government/statistics/sexually-transmitted-infections-stis-annual-data-tables)  
44 [data-tables](https://www.gov.uk/government/statistics/sexually-transmitted-infections-stis-annual-data-tables). (Accessed 12 Mar 2020).  
45  
46
- 47 2 Ricci JM, Fojaco RM, O'Sullivan MJ. Congenital syphilis: the University of Miami/Jackson  
48 Memorial Medical Center experience, 1986-1988. *Obstet Gynecol* 1989;**74**:687-93.  
49  
50
- 51 3 Sheffield JS, Sánchez PJ, Morris G, *et al*. Congenital syphilis after maternal treatment for syphilis  
52 during pregnancy. *Am J Obstet Gynecol* 2002;**186**:569-73. doi:10.1067/mob.2002.121541  
53  
54
- 55 4 Gomez GB, Kamb ML, Newman LM, *et al*. Untreated maternal syphilis and adverse outcomes of  
56 pregnancy: a systematic review and meta-analysis. *Bull World Health Organ* 2013;**91**:217-26.  
57  
58  
59  
60  
61 doi:10.2471/BLT.12.107623

- 1  
2  
3 5 De Santis M, De Luca C, Mappa I, *et al.* Syphilis Infection during Pregnancy: Fetal Risks and  
4 Clinical Management. *Infect Dis Obstet Gynecol* 2012;**2012**. doi:10.1155/2012/430585  
5  
6  
7 6 Mwaniki MK, Atieno M, Lawn JE, *et al.* Long-term neurodevelopmental outcomes after  
8 intrauterine and neonatal insults: a systematic review. *Lancet* 2012;**379**:445–52.  
9 doi:10.1016/S0140-6736(11)61577-8  
10  
11  
12 7 Arnold SR, Ford-Jones EL. Congenital syphilis: A guide to diagnosis and management. *Paediatr*  
13 *Child Health* 2000;**5**:463–9. doi: 10.1093/pch/5.8.463.  
14  
15  
16 8 NHS Digital. NHS Maternity Statistics, England 2017-18. 2018. [https://digital.nhs.uk/data-and-](https://digital.nhs.uk/data-and-information/publications/statistical/nhs-maternity-statistics/2017-18)  
17 [information/publications/statistical/nhs-maternity-statistics/2017-18](https://digital.nhs.uk/data-and-information/publications/statistical/nhs-maternity-statistics/2017-18) (Accessed 12 Mar 2020).  
18  
19  
20 9 PHE and NHS. NHS Infectious Diseases in Pregnancy Screening Programme Screening Standards  
21 Data Report 1 April 2016 to 31 March 2017. 2019.  
22 [https://www.gov.uk/government/publications/infectious-diseases-in-pregnancy-screening-](https://www.gov.uk/government/publications/infectious-diseases-in-pregnancy-screening-standards-data-report)  
23 [standards-data-report](https://www.gov.uk/government/publications/infectious-diseases-in-pregnancy-screening-standards-data-report) (Accessed 12 Mar 2020).  
24  
25  
26  
27 10 Public Health Agency, Belfast. Sexually Transmitted Infection surveillance in Northern Ireland.  
28 An analysis of data for the calendar year 2016. 2017.  
29 [https://www.gov.uk/government/statistics/sexually-transmitted-infections-stis-annual-data-](https://www.gov.uk/government/statistics/sexually-transmitted-infections-stis-annual-data-tables)  
30 [tables](https://www.gov.uk/government/statistics/sexually-transmitted-infections-stis-annual-data-tables) (Accessed 12 Mar 2020).  
31  
32  
33  
34 11 Public Health England. NHS Infectious Diseases in Pregnancy Screening Programme Handbook  
35 2016 to 2017. 2016. [https://www.gov.uk/government/publications/infectious-diseases-in-](https://www.gov.uk/government/publications/infectious-diseases-in-pregnancy-screening-programme-handbook)  
36 [pregnancy-screening-programme-handbook](https://www.gov.uk/government/publications/infectious-diseases-in-pregnancy-screening-programme-handbook) (Accessed 12 Mar 2020).  
37  
38  
39  
40 12 Public Health England. Screening tests for you and your baby. Important information about the  
41 screening choices you will have during and after your pregnancy. NHS booklet February 2020.  
42 [https://assets.publishing.service.gov.uk/government/uploads/system/uploads/attachment\\_dat](https://assets.publishing.service.gov.uk/government/uploads/system/uploads/attachment_data/file/865122/Screening_tests_for_you_and_your_baby_information_leaflet.pdf)  
43 [a/file/865122/Screening\\_tests\\_for\\_you\\_and\\_your\\_baby\\_information\\_leaflet.pdf](https://assets.publishing.service.gov.uk/government/uploads/system/uploads/attachment_data/file/865122/Screening_tests_for_you_and_your_baby_information_leaflet.pdf). (Accessed 12  
44 [Mar 2020](https://assets.publishing.service.gov.uk/government/uploads/system/uploads/attachment_data/file/865122/Screening_tests_for_you_and_your_baby_information_leaflet.pdf)).  
45  
46  
47  
48 13 Townsend CL, Francis K, Peckham CS, *et al.* Syphilis screening in pregnancy in the United  
49 Kingdom, 2010-2011: a national surveillance study. *BJOG* 2017;**124**:79–86. doi:10.1111/1471-  
50 0528.14053  
51  
52  
53  
54 14 World Health Organization. Global guidance on criteria and processes for validation: elimination  
55 of mother-to-child transmission (EMTCT) of HIV and syphilis. Geneva: World Health  
56 Organization, 2013. [https://www.who.int/reproductivehealth/publications/emtct-hiv-](https://www.who.int/reproductivehealth/publications/emtct-hiv-syphilis/en/)  
57 [syphilis/en/](https://www.who.int/reproductivehealth/publications/emtct-hiv-syphilis/en/) (Accessed 12 Mar 2020).  
58  
59  
60



- 1  
2  
3 15 Furegato M, Fifer H, Mohammed H, *et al.* Factors associated with four atypical cases of  
4 congenital syphilis in England, 2016 to 2017: an ecological analysis. *Euro Surveill* 2017;**22**.  
5 doi:10.2807/1560-7917.ES.2017.22.49.17-00750  
6  
7  
8  
9 16 Hersh AR, Megli CJ, Caughey AB. Repeat Screening for Syphilis in the Third Trimester of  
10 Pregnancy: A Cost-Effectiveness Analysis. *Obstet Gynecol* 2018;**132**:699–707.  
11 doi:10.1097/AOG.0000000000002795  
12  
13  
14 17 Albright CM, Emerson JB, Werner EF, *et al.* Third-Trimester Prenatal Syphilis Screening: A Cost-  
15 Effectiveness Analysis. *Obstetrics & Gynecology* 2015;**126**:479–85.  
16 doi:10.1097/AOG.0000000000000997  
17  
18  
19 18 Qin J, Yang T, Xiao S, *et al.* Reported Estimates of Adverse Pregnancy Outcomes among Women  
20 with and without Syphilis: A Systematic Review and Meta-Analysis. *PLoS ONE* 2014;**9**:e102203.  
21 doi:10.1371/journal.pone.0102203  
22  
23  
24  
25 19 XE. Currency Converter. <https://www.xe.com/> (Accessed 12 Mar 2020).  
26  
27 20 Curtis, L. & Burns, A. (2018) Unit Costs of Health and Social Care 2018, Personal Social Services  
28 Research Unit, University of Kent, Canterbury. [https://www.pssru.ac.uk/project-pages/unit-](https://www.pssru.ac.uk/project-pages/unit-costs/unit-costs-2018/)  
29 [costs/unit-costs-2018/](https://www.pssru.ac.uk/project-pages/unit-costs/unit-costs-2018/) (Accessed 12 Mar 2020).  
30  
31  
32 21 Kruse M, Michelsen SI, Flachs EM, *et al.* Lifetime costs of cerebral palsy. *Developmental*  
33 *Medicine & Child Neurology* 2009;**51**:622–8. doi:10.1111/j.1469-8749.2008.03190.x  
34  
35  
36 22 Carroll AE, Downs SM. Comprehensive Cost-Utility Analysis of Newborn Screening Strategies.  
37 *Pediatrics* 2006;**117**:S287–95. doi:10.1542/peds.2005-2633H  
38  
39  
40 23 Probst LE, Wilkinson J, Nichols BD. Diagnosis of congenital syphilis in adults presenting with  
41 interstitial keratitis. *Can J Ophthalmol* 1994;**29**:77–80.  
42  
43  
44 24 UK - Office for National Statistics. National life tables, UK: 2016 - 2018. 2019.  
45 [https://www.ons.gov.uk/peoplepopulationandcommunity/birthsdeathsandmarriages/lifeexpect-](https://www.ons.gov.uk/peoplepopulationandcommunity/birthsdeathsandmarriages/lifeexpectancies/bulletins/nationallifetablesunitedkingdom/2016to2018)  
46 [ancies/bulletins/nationallifetablesunitedkingdom/2016to2018](https://www.ons.gov.uk/peoplepopulationandcommunity/birthsdeathsandmarriages/lifeexpectancies/bulletins/nationallifetablesunitedkingdom/2016to2018) (Accessed 12 Mar 2020).  
47  
48  
49 25 Tom Powell, Michael O'Donnell. House of Commons Debate Pack. NICE appraisals of rare  
50 diseases. 2019. [http://researchbriefings.files.parliament.uk/documents/CDP-2019-0022/CDP-](http://researchbriefings.files.parliament.uk/documents/CDP-2019-0022/CDP-2019-0022.pdf)  
51 [2019-0022.pdf](http://researchbriefings.files.parliament.uk/documents/CDP-2019-0022/CDP-2019-0022.pdf) (Accessed 12 Mar 2020).  
52  
53  
54 26 Hersh AR, Megli CJ, Caughey AB. 299: Comparing syphilis screening protocols in the third  
55 trimester of pregnancy: a cost-effective analysis. *American Journal of Obstetrics and Gynecology*  
56 2017;**216**:S183–4. doi:10.1016/j.ajog.2016.11.557.  
57  
58  
59  
60

- 1  
2  
3 27 Rowley J, Vander Hoorn S, Korenromp E, *et al.* Chlamydia, gonorrhoea, trichomoniasis and  
4 syphilis: global prevalence and incidence estimates, 2016. *Bull World Health Organ* 2019;**97**:548-  
5 562P. doi:10.2471/BLT.18.228486  
6  
7  
8 28 Kuperman AA, Koren O. Antibiotic use during pregnancy: how bad is it? *BMC Med* 2016;**14**.  
9 doi:10.1186/s12916-016-0636-0  
10  
11  
12  
13  
14  
15  
16  
17  
18  
19  
20  
21  
22  
23  
24  
25  
26  
27  
28  
29  
30  
31  
32  
33  
34  
35  
36  
37  
38  
39  
40  
41  
42  
43  
44  
45  
46  
47  
48  
49  
50  
51  
52  
53  
54  
55  
56  
57  
58  
59  
60

For peer review only

1  
2  
3  
4  
5  
6  
7  
8  
9  
10  
11  
12  
13  
14  
15  
16  
17  
18  
19  
20  
21  
22  
23  
24  
25  
26  
27  
28  
29  
30  
31  
32  
33  
34  
35  
36  
37  
38  
39  
40  
41  
42  
43  
44  
45  
46

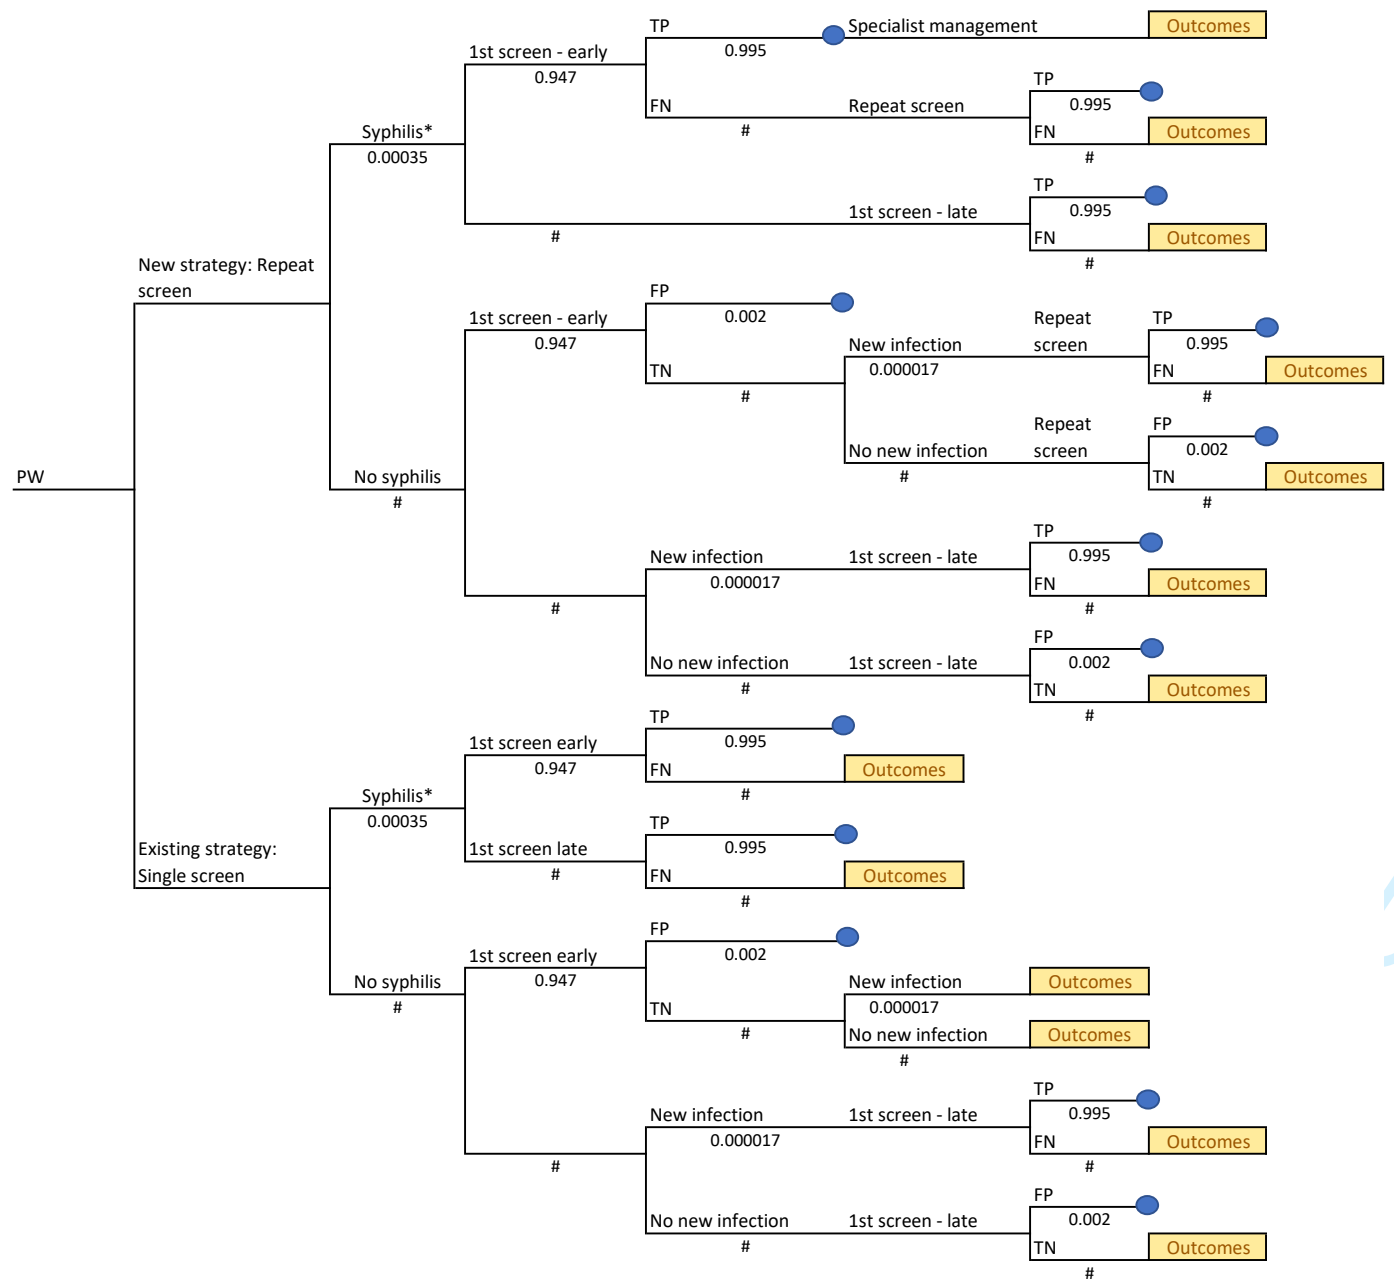

## Online Supplement

### Contents

|            |                                                                                                                                                        |    |
|------------|--------------------------------------------------------------------------------------------------------------------------------------------------------|----|
| Figure S1. | Pregnancy outcomes used in the decision tree comparing universal repeat screening of syphilis in late pregnancy with single screening .....            | 3  |
| Figure S2. | Tornado diagram – one-way deterministic sensitivity analysis of total costs - parameters with least impact removed .....                               | 4  |
| Figure S3. | Tornado diagram - one-way deterministic sensitivity analysis of CS cases - parameters with least impact removed .....                                  | 5  |
| Figure S4. | Incremental cost versus additional cases of CS prevented .....                                                                                         | 6  |
| Table S1.  | Assumptions applied to screening strategies and rationale .....                                                                                        | 7  |
| Table S2.  | Pregnancy outcomes - parameter inputs for decision tree comparing universal repeat screening of syphilis in late pregnancy with single screening ..... | 8  |
| Table S3.  | Pregnancy outcome data taken from published large meta-analysis of international studies [2] .....                                                     | 10 |
| Table S4.  | Comparing the risk of adverse pregnancy outcomes in meta-analysis with risk observed in the UK in order to scale meta-analysis data .....              | 12 |
| Table S5.  | Pregnancy outcome data used in the model – adjusted from published large meta-analysis of international studies [2] to reflect UK risks.....           | 13 |
| Table S6.  | Overall number of women screened for syphilis in pregnancy, 2017/18 .....                                                                              | 14 |
| Table S7.  | Gestational week at first antenatal care attendance – by UK country .....                                                                              | 15 |
| Table S8.  | Calculating the cost per antenatal syphilis screen .....                                                                                               | 16 |
| Table S9.  | Calculating the cost of treatment and management of women diagnosed with syphilis in pregnancy .....                                                   | 18 |
| Table S10. | Gestational week at delivery (used for calculating delivery costs and estimating pregnancy outcomes) .....                                             | 19 |
| Table S11. | Calculating the average healthcare costs associated with a neonatal death.....                                                                         | 20 |
| Table S12. | Calculating the cost of testing for syphilis in neonates with clinical signs of congenital syphilis (CS) .....                                         | 21 |
| Table S13. | Calculating the cost of treating neonates with congenital syphilis (CS).....                                                                           | 23 |

|    |            |                                                                              |
|----|------------|------------------------------------------------------------------------------|
| 1  |            |                                                                              |
| 2  |            |                                                                              |
| 3  | Table S14. | Calculating the cost of neonate screening in infants born to mothers treated |
| 4  |            | for syphilis in pregnancy ..... 24                                           |
| 5  |            |                                                                              |
| 6  | Table S15. | Long-term health care and social care costs associated with congenital       |
| 7  |            | syphilis (CS) – results of the model comparing universal repeat screening    |
| 8  |            | of syphilis in late pregnancy with single screening ..... 25                 |
| 9  |            |                                                                              |
| 10 |            |                                                                              |
| 11 | Table S16. | Clinical outcomes for Scenario 3 (0.00012 probability of syphilis infection  |
| 12 |            | in pregnancy) ..... 26                                                       |
| 13 |            |                                                                              |
| 14 |            |                                                                              |
| 15 | Table S17. | Cost outcomes for Scenario 3 (0.00012 probability of syphilis infection      |
| 16 |            | in pregnancy) ..... 26                                                       |
| 17 |            |                                                                              |
| 18 |            |                                                                              |
| 19 | Table S18. | Requirements to prevent one outcome for Scenario 3 (0.00012 probability      |
| 20 |            | of syphilis infection in pregnancy) ..... 26                                 |
| 21 |            |                                                                              |
| 22 |            |                                                                              |
| 23 | Table S19. | Short and long-term cost outcomes for Scenario 3 (higher syphilis incidence  |
| 24 |            | in pregnancy) ..... 27                                                       |
| 25 |            |                                                                              |
| 26 | Table S20. | Cost per screen needed to meet NICE ICER thresholds (Scenario 7) ..... 29    |
| 27 |            |                                                                              |
| 28 | References | ..... 30                                                                     |
| 29 |            |                                                                              |
| 30 |            |                                                                              |
| 31 |            |                                                                              |
| 32 |            |                                                                              |
| 33 |            |                                                                              |
| 34 |            |                                                                              |
| 35 |            |                                                                              |
| 36 |            |                                                                              |
| 37 |            |                                                                              |
| 38 |            |                                                                              |
| 39 |            |                                                                              |
| 40 |            |                                                                              |
| 41 |            |                                                                              |
| 42 |            |                                                                              |
| 43 |            |                                                                              |
| 44 |            |                                                                              |
| 45 |            |                                                                              |
| 46 |            |                                                                              |
| 47 |            |                                                                              |
| 48 |            |                                                                              |
| 49 |            |                                                                              |
| 50 |            |                                                                              |
| 51 |            |                                                                              |
| 52 |            |                                                                              |
| 53 |            |                                                                              |
| 54 |            |                                                                              |
| 55 |            |                                                                              |
| 56 |            |                                                                              |
| 57 |            |                                                                              |
| 58 |            |                                                                              |
| 59 |            |                                                                              |
| 60 |            |                                                                              |

**Figure S1. Pregnancy outcomes used in the decision tree comparing universal repeat screening of syphilis in late pregnancy with single screening**

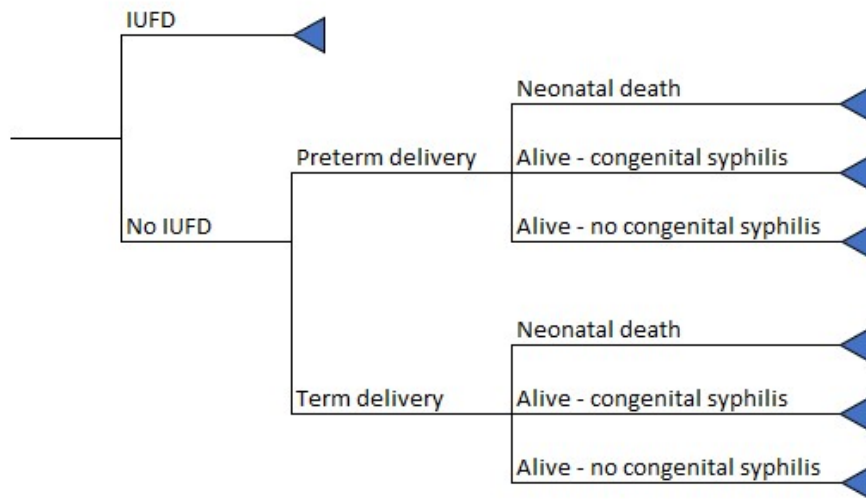

Footnote:

IUFD, intrauterine fetal demise; preterm refers to <37 weeks gestation. The blue triangle indicates the branch end point.

This diagram complements **Figure 1** in the main body of the paper. The probability of each of these outcomes occurring for each branch of the tree is presented in **Table S2**.

Figure S2. Tornado diagram – one-way deterministic sensitivity analysis of total costs - parameters with least impact removed

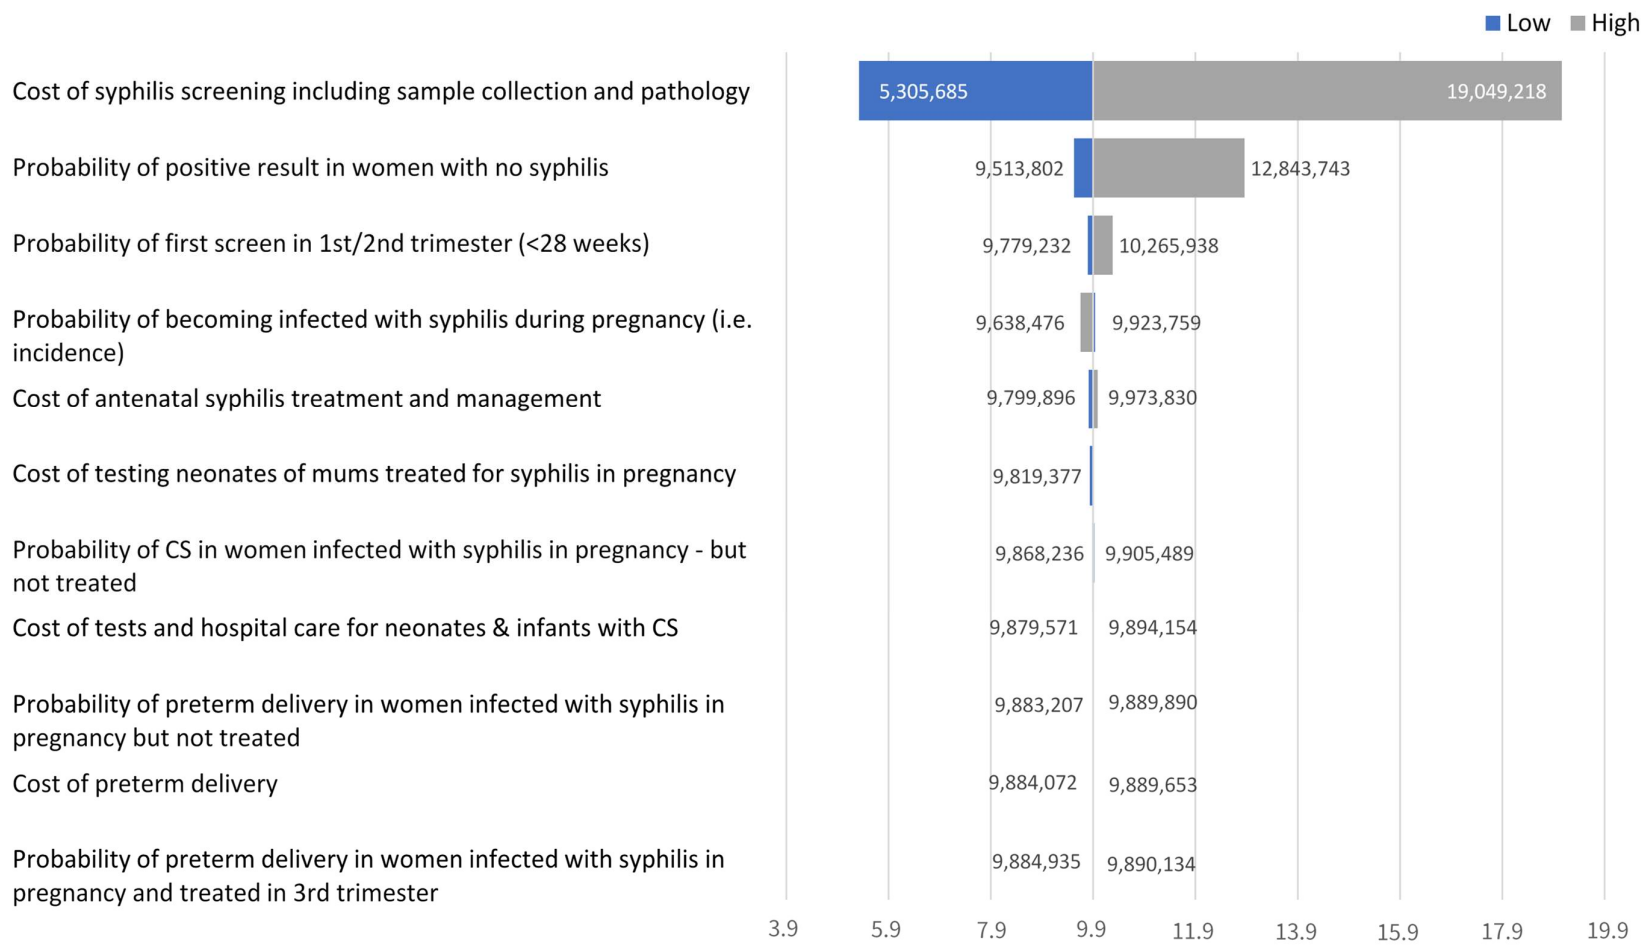

Note: £9,886,863 is the baseline difference in costs. CS, congenital syphilis.

Difference in cost (£m)

**Figure S3. Tornado diagram - one-way deterministic sensitivity analysis of CS cases - parameters with least impact removed**

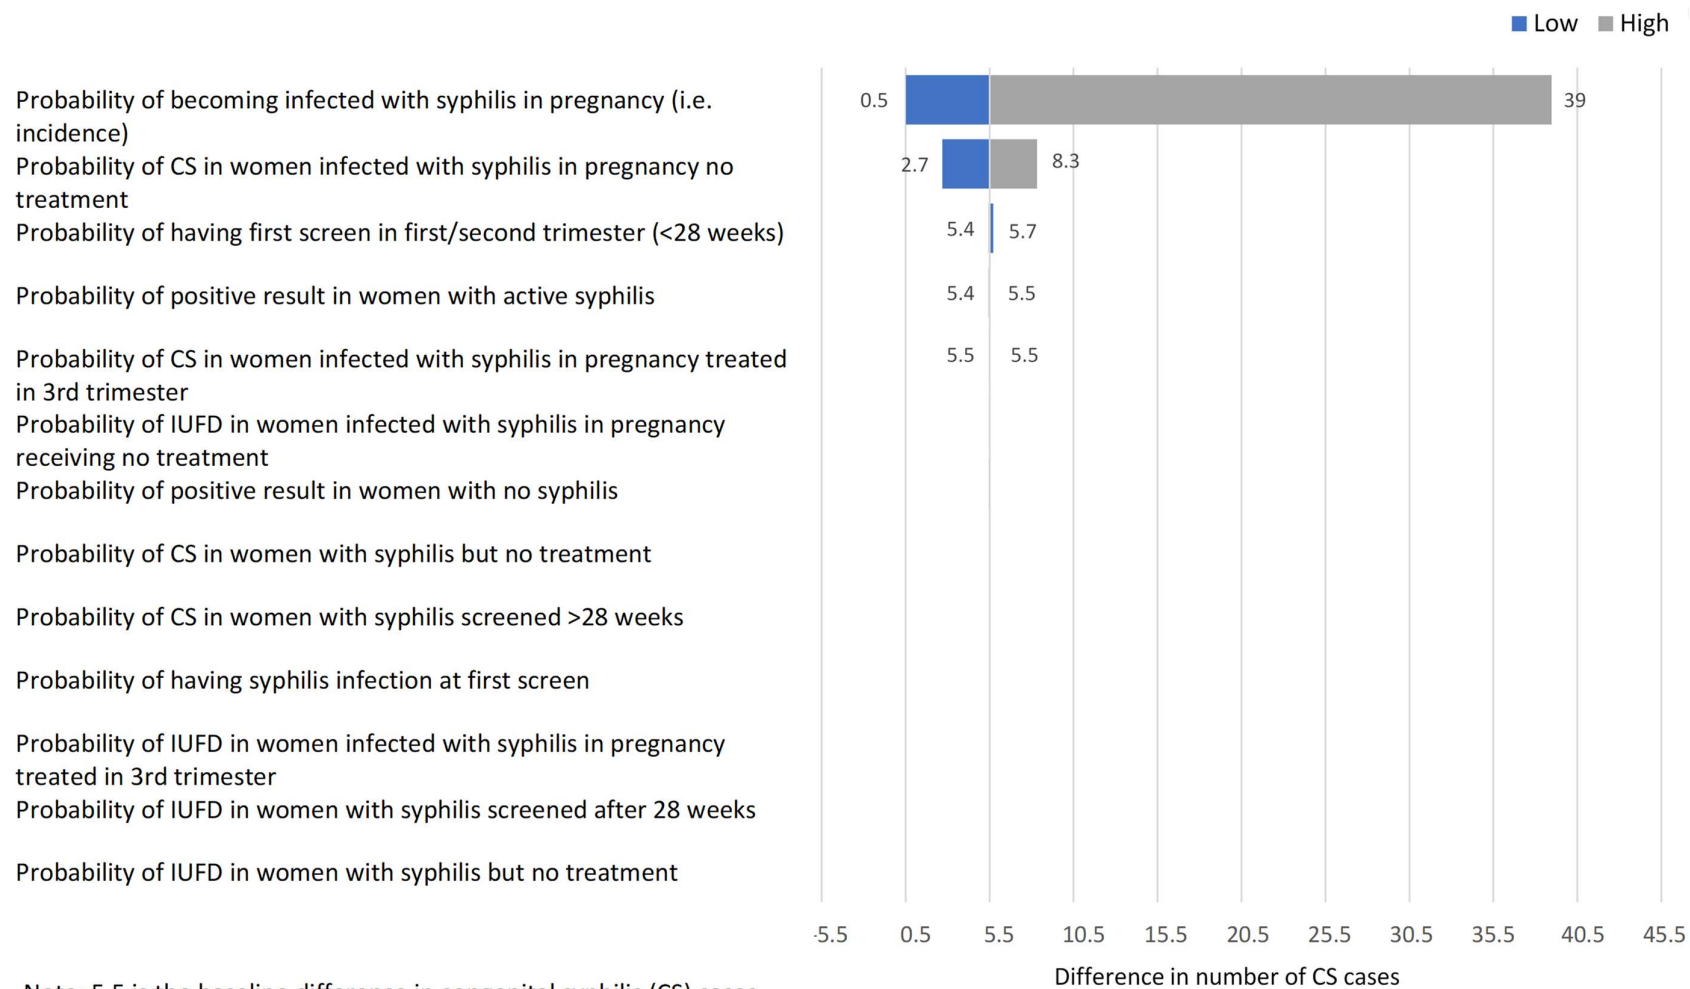

Note: 5.5 is the baseline difference in congenital syphilis (CS) cases.



1  
2  
3  
4  
5  
6  
7  
8  
9  
10  
11  
12  
13  
14  
15  
16  
17  
18  
19  
20  
21  
22  
23  
24  
25  
26  
27  
28  
29  
30  
31  
32  
33  
34  
35  
36  
37  
38  
39  
40  
41  
42  
43  
44  
45  
46  
47  
48  
49  
50  
51  
52  
53  
54  
55  
56  
57  
58  
59  
60

**Figure S4. Incremental cost versus additional cases of CS prevented**

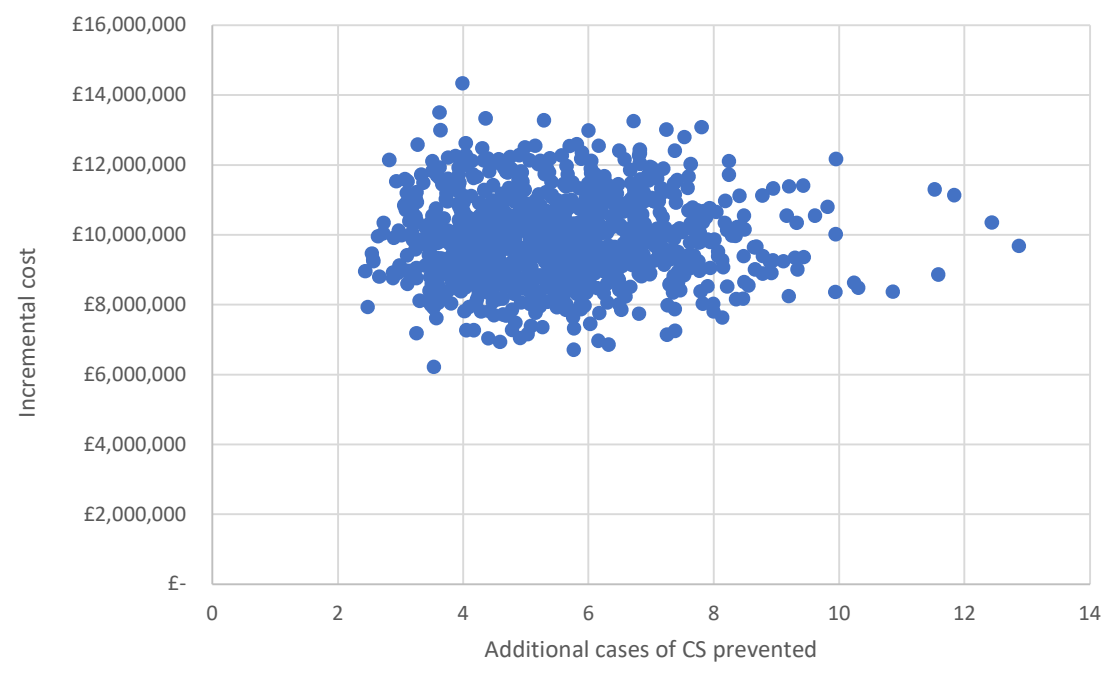

This figure is an output from the Probabilistic Sensitivity Analysis (PSA) and shows the impact of parameter uncertainty on the cost per additional case of CS prevented in universal repeat screening of syphilis in late pregnancy versus single screening.

Review only

**Table S1. Assumptions applied to screening strategies and rationale**

| Assumption                                                                                                                                                                                                                   | Note                                                                                                                                                                                                                                    |
|------------------------------------------------------------------------------------------------------------------------------------------------------------------------------------------------------------------------------|-----------------------------------------------------------------------------------------------------------------------------------------------------------------------------------------------------------------------------------------|
| All women found positive for syphilis, at their first or repeat screen, are referred to care within a sexual health clinic and are successfully treated within that setting.                                                 | As per clinical guidelines [1]. Uptake of treatment in diagnosed women is thought to be high. No published data were found to support or refute this assumption.                                                                        |
| The clinical management of women who are diagnosed with syphilis at their first screen includes repeat testing of syphilis and as such they do not receive a repeat screen as part of the IDPS in either screening strategy. | Recommendation from experts. This is hypothetical, as repeat screening is not current practice.                                                                                                                                         |
| Infants born with CS display signs of CS, 40% at birth and 60% some weeks/months after delivery and are tested and treated accordingly.                                                                                      | Based on expert opinion and evidence indicating that most infants with CS develop signs by 5 weeks. Lack of data on the proportion of CS cases with late presentation (after two years) [1].                                            |
| There is no loss to follow-up, i.e. all women who are identified as needing treatment receive it.                                                                                                                            | Inclusion of loss to follow-up in the model would add unnecessary complexity to the model. Also, there is lack of data on loss to follow-up in this setting.                                                                            |
| There is 100% uptake of repeat screening in women who were initially screened.                                                                                                                                               | Assessed in Scenario Analysis 2.                                                                                                                                                                                                        |
| The model inputs are not correlated.                                                                                                                                                                                         | To avoid over complexity in the model and due to lack of evidence around correlation.                                                                                                                                                   |
| Pregnant women who attend first antenatal care late receive their first screen at that point and therefore miss the opportunity for a repeat test.                                                                           | Recommendation from experts. This is hypothetical, as repeat screening is not current practice.                                                                                                                                         |
| Preterm vs. term delivery impacts costs but the model assumes it has no impact on the risk of pregnancy outcomes (neonatal death or congenital syphilis).                                                                    | Lack of data around correlation between timing of delivery and pregnancy outcome.                                                                                                                                                       |
| The repeat screen would be performed at 28 weeks gestation to coincide with existing routine anaemia blood tests. It was assumed that no new syphilis infection could occur between this screen and delivery.                | No data could be found on the incidence of syphilis or the impact of a new syphilis infection that late in pregnancy. Timing of repeat screen based on expert advice – and is hypothetical as repeat screening is not current practice. |
| No women undergo a repeat screen in the current care pathway (i.e. the single screening strategy).                                                                                                                           | Following expert advice that few high-risk women receive repeat screening at present. Lack of data around uptake of repeat screening and pregnancy outcomes for low risk vs. high risk women.                                           |

**Table S2. Pregnancy outcomes - parameter inputs for decision tree comparing universal repeat screening of syphilis in late pregnancy with single screening**

| Parameter                                                                                                       | Baseline value     | Low   | High  | Note                                                                                                          |
|-----------------------------------------------------------------------------------------------------------------|--------------------|-------|-------|---------------------------------------------------------------------------------------------------------------|
| <b>Pregnant women with no syphilis</b>                                                                          |                    |       |       |                                                                                                               |
| IUFD                                                                                                            | 0.004              | 0.003 | 0.005 | <b>Tables S3-S5</b>                                                                                           |
| Preterm delivery                                                                                                | 0.075              | 0.058 | 0.097 | <b>Tables S3-S5</b>                                                                                           |
| Neonatal death                                                                                                  | 0.002              | 0.001 | 0.003 | <b>Tables S3-S5</b>                                                                                           |
| Congenital syphilis                                                                                             | 0.000              | -     | -     | Assumption                                                                                                    |
| <b>Pregnant women with syphilis diagnosed and treated &lt;28 weeks</b>                                          |                    |       |       |                                                                                                               |
| IUFD                                                                                                            | 0.005              | 0.002 | 0.012 | <b>Tables S3-S5</b>                                                                                           |
| Preterm delivery                                                                                                | 0.079              | 0.042 | 0.143 | <b>Tables S3-S5</b>                                                                                           |
| Neonatal death                                                                                                  | 0.003              | 0.001 | 0.014 | <b>Tables S3-S5</b>                                                                                           |
| Congenital syphilis                                                                                             | 0.011              | 0.008 | 0.016 | <b>Tables S3-S5</b>                                                                                           |
| <b>Pregnant women with syphilis diagnosed and treated ≥28 weeks</b>                                             |                    |       |       |                                                                                                               |
| IUFD                                                                                                            | 0.023              | 0.018 | 0.028 | <b>Tables S3-S5</b>                                                                                           |
| Preterm delivery                                                                                                | 0.183              | 0.119 | 0.275 | <b>Tables S3-S5</b>                                                                                           |
| Neonatal death                                                                                                  | 0.013              | 0.005 | 0.032 | <b>Tables S3-S5</b>                                                                                           |
| Congenital syphilis                                                                                             | 0.038 <sup>1</sup> | 0.029 | 0.047 | <b>Tables S3-S5</b>                                                                                           |
| <b>Pregnant women with syphilis not diagnosed or treated</b>                                                    |                    |       |       |                                                                                                               |
| IUFD                                                                                                            | 0.028              | 0.023 | 0.033 | <b>Tables S3-S5</b>                                                                                           |
| Preterm delivery                                                                                                | 0.241              | 0.188 | 0.305 | <b>Tables S3-S5</b>                                                                                           |
| Neonatal death                                                                                                  | 0.014              | 0.009 | 0.022 | <b>Tables S3-S5</b>                                                                                           |
| Congenital syphilis                                                                                             | 0.034 <sup>1</sup> | 0.026 | 0.042 | <b>Tables S3-S5</b>                                                                                           |
| <b>Pregnant women infected with syphilis in pregnancy and diagnosed and treated in 3<sup>rd</sup> trimester</b> |                    |       |       |                                                                                                               |
| IUFD                                                                                                            | 0.006              | 0.002 | 0.013 | Assumed to have same risk as women diagnosed and treated for syphilis infection in 1 <sup>st</sup> trimester. |
| Preterm delivery                                                                                                | 0.071              | 0.038 | 0.127 |                                                                                                               |
| Neonatal death                                                                                                  | 0.003              | 0.001 | 0.015 |                                                                                                               |
| Congenital syphilis                                                                                             | 0.010              | 0.007 | 0.014 |                                                                                                               |
| <b>Pregnant women infected with syphilis during pregnancy not diagnosed or treated</b>                          |                    |       |       |                                                                                                               |
| IUFD                                                                                                            | 0.028              | 0.023 | 0.033 | Assumed to have same risk as women with syphilis not diagnosed or treated. Estimate based on expert opinion.  |
| Preterm delivery                                                                                                | 0.241              | 0.188 | 0.305 |                                                                                                               |
| Neonatal death                                                                                                  | 0.014              | 0.009 | 0.022 |                                                                                                               |
| Congenital syphilis                                                                                             | 0.500              | 0.250 | 0.750 |                                                                                                               |

IUFD, intrauterine foetal demise. Low and high values are based on the 95% confidence intervals (CIs) from the meta-analysis Qin *et al.* [2] adjusted to the UK setting in the same way as the baseline values (See **Tables S3-S5**).

<sup>1</sup>The probability of congenital syphilis in women with syphilis is higher in women treated at ≥28 weeks gestation than in women receiving no treatment. This is because estimates are from a meta-

1  
2  
3 analysis which combined data from 15 and 33 studies respectively to estimate risk and both  
4 estimates have wide, overlapping confidence intervals.  
5  
6  
7  
8  
9  
10  
11  
12  
13  
14  
15  
16  
17  
18  
19  
20  
21  
22  
23  
24  
25  
26  
27  
28  
29  
30  
31  
32  
33  
34  
35  
36  
37  
38  
39  
40  
41  
42  
43  
44  
45  
46  
47  
48  
49  
50  
51  
52  
53  
54  
55  
56  
57  
58  
59  
60

For peer review only

Table S3. Pregnancy outcome data taken from published large meta-analysis of international studies [2]

| Pregnancy outcome   | Women with no syphilis | Syphilis infection at time of conception                |                                                         |                                                           |                                                         | New syphilis infection during pregnancy |                                                          |                   |
|---------------------|------------------------|---------------------------------------------------------|---------------------------------------------------------|-----------------------------------------------------------|---------------------------------------------------------|-----------------------------------------|----------------------------------------------------------|-------------------|
|                     |                        | a<br>First screen + treatment 1 <sup>st</sup> trimester | b<br>First screen + treatment 2 <sup>nd</sup> trimester | c<br>First screen + treatment 1/2 <sup>nd</sup> trimester | d<br>First screen + treatment 3 <sup>rd</sup> trimester | e<br>No treatment                       | f<br>Repeat screen + treatment 3 <sup>rd</sup> trimester | g<br>No treatment |
| Congenital syphilis | 0.0%                   | 10.4%                                                   | 17.6%                                                   | 12.1%                                                     | 40.6%                                                   | 36.0%                                   | 10.4%                                                    | 50%               |
| Preterm delivery    | 7.2%                   | 6.8%                                                    | 10.1%                                                   | 7.6%                                                      | 17.6%                                                   | 23.2%                                   | 6.8%                                                     | 23.2%             |
| IUFD (stillbirth)   | 3.7%                   | 5.3%                                                    | 4.2%                                                    | 5.0%                                                      | 21.3%                                                   | 26.4%                                   | 5.3%                                                     | 26.4%             |
| Neonatal death      | 2.0%                   | 3.8%                                                    | 3.0%                                                    | 3.6%                                                      | 15.1%                                                   | 16.2%                                   | 3.8%                                                     | 16.2%             |

These data are from a systematic review and meta-analysis which measured pregnancy outcomes in women with and without syphilis (Qin *et al.* [2]). Each estimate is an average calculated by combining data from 2-33 different studies.

The risk of neonatal death was reported for the whole of pregnancy but was not calculated separately for treatment in each pregnancy trimester. For the model, the risk of intrauterine fetal demise (IUFD) in each trimester compared to the overall risk in pregnancy was used to estimate the risk of neonatal death in each trimester compared to the overall risk in pregnancy.

Column c, the risk of pregnancy outcomes if syphilis is diagnosed and treated in the 1<sup>st</sup> or 2<sup>nd</sup> trimester, was calculated using data from the 1<sup>st</sup> and 2<sup>nd</sup> trimesters (column a and b) and using UK data to calculate the proportion of women first attending antenatal care in their 1<sup>st</sup> or 2<sup>nd</sup> trimester (75.9% and 24.1% respectively). For example, the risk of congenital syphilis (CS) was calculated as follows: (0.759\*0.104) + (0.241\*0.176) = 0.121.

1  
2  
3  
4  
5 Column e: no treatment group due to a false negative test result. The probability of CS in women with syphilis is higher in women treated in 3<sup>rd</sup> trimester  
6 (column d) than in women receiving no treatment (column e). This is because estimates are from a meta-analysis which combined data from 15 and 33  
7 studies respectively to estimate risk and both estimates have wide, overlapping confidence intervals.  
8  
9

10 Column f: women infected with syphilis during pregnancy but diagnosed and treated at their repeat screen (in third trimester) are assumed to have the  
11 same risk of adverse pregnancy outcomes as women who are diagnosed and treated in their first pregnancy trimester (column a) (from expert opinion).  
12

13 Column g: the risk of preterm delivery, IUFD and neonatal death is assumed to be the same as for women who have syphilis at conception but who are not  
14 treated in pregnancy (column e). However, the risk of CS is estimated as 50%, since the risk is known to be high in primary infection (from expert opinion).  
15

16  
17 The risk of adverse pregnancy outcomes in women with no syphilis in the meta-analysis data (Qin *et al*) [2] were considerably higher than the numbers seen  
18 in pregnant women in the UK. The risk of CS in women with syphilis was also considerably higher in the meta-analysis results than seen in the UK [3,4].  
19

20 Therefore, these inputs were adjusted to the UK settings (See **Table S4**).  
21  
22  
23  
24  
25  
26  
27  
28  
29  
30  
31  
32  
33  
34  
35  
36  
37  
38  
39  
40  
41  
42  
43  
44  
45  
46  
47

**Table S4. Comparing the risk of adverse pregnancy outcomes in meta-analysis with risk observed in the UK in order to scale meta-analysis data**

| Pregnancy outcome                   | Meta-analysis data [2]<br>A | UK data [n/N]<br>B              | UK vs. meta-analysis<br>C | UK data reference |
|-------------------------------------|-----------------------------|---------------------------------|---------------------------|-------------------|
| <b>Women with no syphilis</b>       |                             |                                 |                           |                   |
| Preterm delivery                    | 7.2%                        | 7.485% [57,079/762,594]         | 104.0%                    | <b>Table S10</b>  |
| IUFD (stillbirth)                   | 3.7%                        | 0.393% [3.93/1000] <sup>1</sup> | 10.6%                     | [5]               |
| Neonatal death                      | 2.0%                        | 0.172% [1.72/1000] <sup>1</sup> | 8.6%                      | [5]               |
| <b>Women with syphilis</b>          |                             |                                 |                           |                   |
| Congenital syphilis (any trimester) | 13.7%                       | 1.28% [3.4/266] <sup>2</sup>    | 9.4%                      | [3,4]             |

<sup>1</sup>The most recent data on pregnancy outcomes from the UK were from 2016 when the total number of pregnancies in the UK was 780,043 [5]. Pregnancy outcomes reported from the UK as a whole are used for the no syphilis group.

<sup>2</sup>Based on the numbers in our model, we would expect a total of 266 women in 2017/18 to have syphilis in pregnancy i.e. 254 women at the start of pregnancy [0.00035\*725,891] plus 12 women infected during pregnancy [0.000017\*725,637].

No data on the risk of the different pregnancy outcomes during each trimester were available from the UK. Therefore, the difference in overall risk in pregnancy between the UK and the meta-analysis data was used to adjust data from the meta-analysis to calculate the risk of outcomes in each trimester for women in the UK. The calculated risks, used in the model, are presented in **Table S5** and an example of how they were calculated is included in the **Table S5** footnotes.

**Table S5. Pregnancy outcome data used in the model – adjusted from published large meta-analysis of international studies [2] to reflect UK risks**

| Pregnancy outcome   | Women with no syphilis | Syphilis infection at time of conception           |                                                    |                                                      |                                                    | Becomes infected during pregnancy |                                                     |              |
|---------------------|------------------------|----------------------------------------------------|----------------------------------------------------|------------------------------------------------------|----------------------------------------------------|-----------------------------------|-----------------------------------------------------|--------------|
|                     |                        | First screen + treatment 1 <sup>st</sup> trimester | First screen + treatment 2 <sup>nd</sup> trimester | First screen + treatment 1/2 <sup>nd</sup> trimester | First screen + treatment 3 <sup>rd</sup> trimester | No treatment                      | Repeat screen + treatment 3 <sup>rd</sup> trimester | No treatment |
| Congenital syphilis | 0.0%                   | 0.97%                                              | 1.65%                                              | 1.14%                                                | 3.80%                                              | 3.37%                             | 0.97%                                               | 50.0%        |
| Preterm delivery    | 7.48%                  | 7.07%                                              | 10.50%                                             | 7.90%                                                | 18.03%                                             | 24.12%                            | 7.07%                                               | 24.12%       |
| IUFD (stillbirth)   | 0.39%                  | 0.56%                                              | 0.45%                                              | 0.53%                                                | 2.26%                                              | 2.80%                             | 0.56%                                               | 2.80%        |
| Neonatal death      | 0.17%                  | 0.32%                                              | 0.26%                                              | 0.31%                                                | 1.30%                                              | 1.39%                             | 0.32%                                               | 1.39%        |

These numbers were calculated using data from a meta-analysis (**Table S3**) adjusted by the difference in the (overall) risk of pregnancy outcomes between the UK and the meta-analysis (**Table S4**, column C).

For example, the risk of congenital syphilis (CS) in women treated for syphilis in the 1<sup>st</sup>/2<sup>nd</sup> trimester (1.14%) was calculated as follows:  $(0.121 \times 0.094) = 0.0114$  i.e. the risk of CS in the 1<sup>st</sup>/2<sup>nd</sup> trimester from the meta-analysis (**Table S3**, column C) multiplied by the proportional in of risk of CS in pregnancy in the UK vs. the meta-analysis (**Table S4**, column C).

The published 95% confidence intervals were adjusted in the same way to calculate the low and high values used in the sensitivity analysis.



1  
2  
3  
4  
5  
6  
7  
8  
9  
10  
11  
12  
13  
14  
15  
16  
17  
18  
19  
20  
21  
22  
23  
24  
25  
26  
27  
28  
29  
30  
31  
32  
33  
34  
35  
36  
37  
38  
39  
40  
41  
42  
43  
44  
45  
46  
47

**Table S6. Overall number of women screened for syphilis in pregnancy, 2017/18**

| Country          | Total number of deliveries | Estimated number screened | Reference |
|------------------|----------------------------|---------------------------|-----------|
| England          | 626,203                    | 623,698                   | [36]      |
| Northern Ireland | 23,045                     | 23,038                    | [38]      |
| Scotland         | 51,197                     | 50,992                    | [39]      |
| Wales            | 28,361                     | 28,248                    | [40]      |
| UK total         | 728,806                    | 725,976                   |           |

In England, Wales and Scotland, these data exclude women giving birth at home or in non-NHS hospitals.

Screening uptake in 2017/2018 for England, Wales and Scotland was estimated as 99.6% i.e. the same as uptake in England in 2016/2017 [15].

The uptake of screening in 2017/2018 for Northern Ireland was 99.97%, based on data collected by Public Health Agency Northern Ireland 2017/2018.

**Table S7. Gestational week at first antenatal care attendance – by UK country**

| UK country       | <12 weeks |       | 12-28 weeks |       | ≥28 weeks |      | No data  | With data available | Total  | Reference |
|------------------|-----------|-------|-------------|-------|-----------|------|----------|---------------------|--------|-----------|
|                  | n         | %     | n           | %     | n         | %    |          |                     |        |           |
| England          | 299,634   | 70.1% | 103,137     | 24.1% | 24,935    | 5.8% | ~200,000 | 427,706             | -      | [6]       |
| Northern Ireland | 15,069    | 65.4% | 7,607       | 33.0% | 365       | 1.6% | 4        | 23,041              | 23,045 | [7]       |
| Scotland         | 42,840    | 84.2% | 5,876       | 11.5% | 2,165     | 4.3% | 316      | 50,881              | 51,197 | [8]       |
| Wales            | 22,878    | 82.2% | 4,226       | 15.2% | 745       | 2.7% | 512      | 27,849              | 28,361 | [9]       |
| UK total         | 380,421   | 71.8% | 120,846     | 22.8% | 28,210    | 5.3% |          | 529,477             |        |           |

All data are for year 2017/18. The SASS study [3] found that in women screening positive for syphilis, 6.4% (81/1271) had their first antenatal attendance at 27 weeks or later. These data were used to calculate pregnancy outcomes and the percentage of women receiving a first syphilis screen before 28 weeks gestation (94.7% i.e. 501,267/529,477).

**Table S8. Calculating the cost per antenatal syphilis screen**

| Activity                           | Cost per item (£) | Proportion with cost | Average cost/person (£) | Notes                                                                                                                                                                                                                                                                                                                                                                                            |
|------------------------------------|-------------------|----------------------|-------------------------|--------------------------------------------------------------------------------------------------------------------------------------------------------------------------------------------------------------------------------------------------------------------------------------------------------------------------------------------------------------------------------------------------|
| Blood sample collection            | 0.23              | 1.00                 | 0.23                    | Includes only equipment costs. Syphilis screening is performed at the same time as other antenatal screening tests – and therefore does not incur additional staff time.                                                                                                                                                                                                                         |
| Laboratory testing (higher cost)   | 16.50             | 0.50                 | 8.25                    | Price quoted in London Sexual Health full STI screen tariff [10].                                                                                                                                                                                                                                                                                                                                |
| Laboratory testing (lower cost)    | 9.00              | 0.50                 | 4.50                    | Price quoted by laboratory manager in Leeds. This is the price charged per screen. It covers consumables, internal quality control (IQC), external quality assessment (EQA), laboratory staff time, and overheads. It accounts for the ratio of negative (which require only one test), positive (which require confirmatory work) test results.                                                 |
| Input from multi-disciplinary team | 37.50             | 0.002                | 0.08                    | Estimate 1/500 women require 30 minutes input from the MDT based on expert opinion.                                                                                                                                                                                                                                                                                                              |
| Reference laboratory testing       | 40.00             | 0.003                | 0.10                    | Estimate 1/400 samples sent to reference laboratory for confirmatory testing based on England's central reference lab receiving ~1300 samples/year (personal communication with laboratory manager).                                                                                                                                                                                             |
| Repeat test blood collection       | 3.86              | 0.01                 | 0.04                    | 1/100 women require a repeat test due to inconclusive test results. This cost is taken from London Sexual Health full STI screen tariff [10].                                                                                                                                                                                                                                                    |
| Laboratory testing (higher cost)   | 16.50             | 0.005                | 0.08                    | Repeat test due to inconclusive test result from first assay.                                                                                                                                                                                                                                                                                                                                    |
| Laboratory testing (lower cost)    | 9.00              | 0.005                | 0.05                    | Repeat test due to inconclusive test result from first assay.                                                                                                                                                                                                                                                                                                                                    |
| Referral to sexual health clinic   | 56.60             | 0.0006               | 0.04                    | Women with positive result for antibodies are referred to Sexual Health Clinic for sexual history and risk assessment. Cost based on a 30-minute appointment with a consultant plus 5 mins of receptionist time (staff costs taken from PSSRU 2017/18 [11]). Proportion taken from SASS study [3] which found 607/961,494 women had positive antibody result but did not then require treatment. |
| <b>Total</b>                       |                   |                      | <b>13.36</b>            |                                                                                                                                                                                                                                                                                                                                                                                                  |

1  
2  
3  
4  
5 Footnote: A 50:50 split between the higher and lower costs for laboratory tests was used. The cost of a repeat screen was assumed to be the same as the  
6 cost of a first screen since in both cases, samples would be taken at a routine antenatal appointment when other blood tests are performed, i.e. HIV and  
7 hepatitis B screening at first screen and routine anaemia blood tests at 28 weeks gestation.  
8  
9  
10  
11  
12  
13  
14  
15  
16  
17  
18  
19  
20  
21  
22  
23  
24  
25  
26  
27  
28  
29  
30  
31  
32  
33  
34  
35  
36  
37  
38  
39  
40  
41  
42  
43  
44  
45  
46  
47

For peer review only

1  
2  
3  
4  
5  
6  
7  
8  
9  
10  
11  
12  
13  
14  
15  
16  
17  
18  
19  
20  
21  
22  
23  
24  
25  
26  
27  
28  
29  
30  
31  
32  
33  
34  
35  
36  
37  
38  
39  
40  
41  
42  
43  
44  
45  
46  
47

**Table S9. Calculating the cost of treatment and management of women diagnosed with syphilis in pregnancy**

| <b>Activity</b>                                                 | <b>Cost per woman (£)</b> | <b>Notes</b>                                                                                                                                                                                                                                                                                                                                                                                                                                                 |
|-----------------------------------------------------------------|---------------------------|--------------------------------------------------------------------------------------------------------------------------------------------------------------------------------------------------------------------------------------------------------------------------------------------------------------------------------------------------------------------------------------------------------------------------------------------------------------|
| STI Intervention C - Management of reactive treponemal serology | 262.34                    | Cost taken from the London Integrated Sexual Health Tariff 2017/18 which includes 5 visits to clinic for treatment with penicillin regimen appropriate for the stage of infection [1,10].<br>In pregnant women diagnosed in the first trimester, all 5 visits would occur before delivery, in women diagnosed in final trimester, 3/5 visits would occur before delivery and 2 after delivery (personal communication with senior sexual health consultant). |
| Additional cost at 1 <sup>st</sup> visit                        | 16.50                     | Additional cost due to patient being seen by consultant doctor instead of by doctor/nurse mix [11].                                                                                                                                                                                                                                                                                                                                                          |
| Additional cost at 2 <sup>nd</sup> visit                        | 8.25                      | Additional cost due to patient being seen by consultant doctor instead of by doctor/nurse mix [11].                                                                                                                                                                                                                                                                                                                                                          |
| Additional cost at 5 <sup>th</sup> visit                        | 27.00                     | Additional cost due to patient being seen by consultant doctor instead of by doctor/nurse mix [11].                                                                                                                                                                                                                                                                                                                                                          |
| <b>Total</b>                                                    | <b>314.09</b>             |                                                                                                                                                                                                                                                                                                                                                                                                                                                              |

There would be no change to the staff grade (from the tariff) at the 3<sup>rd</sup> or 4<sup>th</sup> visit, when the patient would be seen by a nurse.

This cost was calculated based on expert opinion from a senior consultant in sexual health.

**Table S10. Gestational week at delivery (used for calculating delivery costs and estimating pregnancy outcomes)**

| Country          | ≤33 weeks |      | 34-36 weeks |      | >36 weeks |       | No data | With data available | Total  | Ref  | Notes        |
|------------------|-----------|------|-------------|------|-----------|-------|---------|---------------------|--------|------|--------------|
|                  | n         | %    | n           | %    | n         | %     |         |                     |        |      |              |
| England          | 13,846    | 2.1% | 35,533      | 5.4% | 607,972   | 92.5% |         | 657,351             | -      | [19] | 2014 data    |
| Northern Ireland | 470       | 2.0% | 1,385       | 6.0% | 21,190    | 92.0% | 0       | 23,045              | 23,045 | [7]  | 2017/18 data |
| Scotland         | 868       | 1.7% | 2,444       | 4.9% | 46,791    | 93.4% | 207     | 50,103              | 50,310 | [8]  | 2017/18 data |
| Wales            | 723       | 2.3% | 1,810       | 5.6% | 29,562    | 92.1% | 141     | 32,095              | 32,236 | [20] | 2017 data    |
| UK total         | 15,907    | 2.1% | 41,172      | 5.4% | 705,515   | 92.5% |         | 762,594             |        |      |              |

1  
2  
3  
4  
5  
6  
7  
8  
9  
10  
11  
12  
13  
14  
15  
16  
17  
18  
19  
20  
21  
22  
23  
24  
25  
26  
27  
28  
29  
30  
31  
32  
33  
34  
35  
36  
37  
38  
39  
40  
41  
42  
43  
44  
45  
46  
47

**Table S11. Calculating the average healthcare costs associated with a neonatal death**

| Activity          | Resource/<br>Activity | Quantity | Cost per unit | Total cost       | Ref    | Notes:                                                                                |
|-------------------|-----------------------|----------|---------------|------------------|--------|---------------------------------------------------------------------------------------|
| Cost of IUFD      | -                     | -        | -             | £4,356.80        | [12]   |                                                                                       |
| Hospital stay     | Day                   | 3        | £483.00       | £1,449.00        | [1,13] | Based on NHS tariff for Paediatric Major Infections with CC Score 0 - HRG code PW16E. |
| <b>Total cost</b> |                       |          |               | <b>£5,805.80</b> |        |                                                                                       |

The cost of neonatal death is calculated using the cost of intrauterine fetal demise (IUFD), which includes the cost of post-mortem, parental counselling and a subsequent pregnancy, plus an additional 3-days in a paediatric intensive care unit for the neonate. Three days hospital stay is an estimate based on expert opinion.

For peer review only

**Table S12. Calculating the cost of testing for syphilis in neonates with clinical signs of congenital syphilis (CS)**

| Activity                                                    | Number   |             | Resource type | Resource/ Activity            | Quantity /minutes         | Cost per unit/hour (£) | Cost per neonate (£) | Ref  | Notes                                                                        |
|-------------------------------------------------------------|----------|-------------|---------------|-------------------------------|---------------------------|------------------------|----------------------|------|------------------------------------------------------------------------------|
|                                                             | At birth | After birth |               |                               |                           |                        |                      |      |                                                                              |
| Clinical assessment for signs of CS                         | 1        |             | Staff time    | Consultant paediatrician      | 30                        | 108.00                 | 54.00                | [11] |                                                                              |
| Review of syphilis test results                             |          | 8           | Staff time    | Consultant paediatrician      | 10 per review             | 108.00                 | 144.00               | [11] |                                                                              |
| RPR/VDRL blood test                                         | 1        | 4           | Staff time    | Blood taken by nurse (band 6) | 10 per test               | 45.00                  | 37.50                | [11] | Test at birth, 1, 3, 6 and 12 months.                                        |
| IgM EIA blood test                                          | 1        | 2           | Staff time    | Blood taken by nurse          | 10 per test               | 45.00                  | 22.50                | [11] | Test at birth, 1 and 3 months.                                               |
| Syphilis blood tests (as above)                             | 2        | 6           | Diagnostics   | Laboratory tests              | 5 (3 combined + 2 single) | 12.75                  | 63.75                |      | Same cost if both tests are performed or only RPR/VDRL blood test performed. |
| Blood tests: full blood count, liver function, electrolytes | 1        |             | Staff time    | Blood taken by nurse          | 10                        | 45.00                  | 7.50                 | [11] |                                                                              |
| Blood tests (as above)                                      | 1        |             | Diagnostics   | Laboratory tests              | 1                         | 20.00                  | 20.00                |      | Estimate                                                                     |
| Lumbar puncture (white blood cell, protein, RPR, TPPA)      | 1        |             | Staff time    | Paediatric registrar          | 45                        | 43.00                  | 32.25                | [11] |                                                                              |
| Blood tests (as above)                                      | 1        |             | Diagnostics   | Laboratory tests              | 1                         | 20.00                  | 20.00                |      | Estimate                                                                     |
| X-ray of long bones                                         | 1        |             | Staff time    | Consultant Radiographer       | 30                        | 93.00                  | 46.50                | [11] | Based on cost of Band 8c Radiographer                                        |

Continued over the page.



Table S12 Continued from previous page.

| Activity                                                 | Number<br>At<br>birth | Number<br>After<br>birth | Resource<br>type | Resource/<br>Activity                    | Quantity<br>/minutes | Cost per<br>unit/hour<br>(£) | Cost per<br>neonate<br>(£) | Ref  | Notes                                    |
|----------------------------------------------------------|-----------------------|--------------------------|------------------|------------------------------------------|----------------------|------------------------------|----------------------------|------|------------------------------------------|
| Chest x-ray                                              | 1                     |                          | Staff time       | Consultant<br>Radiographer               | 30                   | 93.00                        | 46.50                      | [11] | Based on cost of Band<br>8c Radiographer |
| X-ray film                                               | 1                     |                          | Diagnostics      | Diagnostic tests                         | 2                    | 25.00                        | 50.00                      | [14] |                                          |
| Ophthalmic assessment                                    | 1                     |                          | Staff time       | Consultant<br>Ophthalmologist            | 30                   | 108.00                       | 54.00                      | [11] |                                          |
| Audiology review                                         | 1                     |                          | Staff time       | Audiologist<br>(Associate<br>specialist) | 10                   | 105.00                       | 17.50                      | [11] |                                          |
| Sample taken for<br>microscopy/PCR                       | 1                     |                          | Staff time       | Nurse (band 6)                           | 10                   | 45.00                        | 7.50                       | [11] |                                          |
| Dark ground microscopy and<br>PCR for <i>T. pallidum</i> | 1                     |                          | Diagnostics      | Laboratory tests                         | 1                    | 20.00                        | 20.00                      |      | Estimate                                 |
| Results review and liaison with<br>sexual health team    | 1                     |                          | Staff time       | Consultant<br>paediatrician              | 60                   | 108.00                       | 108.00                     | [11] |                                          |
| <b>Total cost</b>                                        |                       |                          |                  |                                          |                      |                              | <b>751.50</b>              |      |                                          |

RPR/VDRL, rapid plasma reagent/venereal disease research lab test. Detailed testing protocol was obtained from Clinical Guidelines [1] and expert opinion.

**Table S13. Calculating the cost of treating neonates with congenital syphilis (CS)**

| Activity                                                                     | N  | Resource type | Resource/ Activity                 | Unit          | Cost per unit (£) | Cost per neonate (£) | Reference | Notes                                                                                 |
|------------------------------------------------------------------------------|----|---------------|------------------------------------|---------------|-------------------|----------------------|-----------|---------------------------------------------------------------------------------------|
| <b>Neonates with signs of CS at delivery (40%)</b>                           |    |               |                                    |               |                   |                      |           |                                                                                       |
| Treatment for CS                                                             | 23 | Medication    | Penicillin (dose 30mg/kg)          | 105mg dose    | 3.00              | 12.08                | [1,15,16] | Dose calculated using average birthweight of 3.5kg.                                   |
| Treatment for CS                                                             | 23 | Medication    | Glucose 5% or sodium chloride 0.9% | Infusion bag  | 2.14              | 49.22                | [1,15,16] | Standard sized infusion bags are used with the surplus discarded.                     |
| Hospital stay                                                                | 10 | Tariff cost   | Hospital stay                      | Days          | 721.00            | 7,210.00             | [1,13,17] | Based on NHS tariff for Neonatal Diagnoses with CC Score 0 - HRG code PB04D.          |
| <b>Neonates with signs of CS days/weeks after delivery (60%)</b>             |    |               |                                    |               |                   |                      |           |                                                                                       |
| Treatment for CS                                                             | 30 | Medication    | Penicillin (dose 30mg/kg)          | 123.75mg dose | 3.00              | 18.56                | [1,15,16] | Dose calculated using average weight at 1 month of 4.125kg.                           |
| Treatment for CS                                                             | 30 | Medication    | Glucose 5% or sodium chloride 0.9% | Infusion bag  | 2.14              | 64.20                | [1,15,16] | Standard sized infusion bags are used with the surplus discarded.                     |
| Hospital stay                                                                | 10 | Tariff cost   | Hospital stay                      | Days          | 483.00            | 4,830.00             | [1,13,17] | Based on NHS tariff for Paediatric Major Infections with CC Score 0 - HRG code PW16E. |
| <b>Total cost of treating neonates with CS (based on 40%/60% split)</b>      |    |               |                                    |               |                   | 5,856.18             |           |                                                                                       |
| <b>Total cost of testing and treating neonates with clinical signs of CS</b> |    |               |                                    |               |                   | 6,607.68             |           |                                                                                       |

CS, congenital syphilis. Clinical guidelines recommend that treatment is given every 12 hours (for infants  $\leq 7$  days of age) and every 8 hours (for infants  $> 7$  days of age) for a total of 10 days with treatment typically starting on the day of delivery.

**Table S14. Calculating the cost of neonate screening in infants born to mothers treated for syphilis in pregnancy**

| Activity                            | Number   |             | Resource type | Resource/ Activity       | Quantity/ minutes | Cost per unit/hour (£) | Cost per neonate (£) | Ref  | Notes                                                                                                           |  |
|-------------------------------------|----------|-------------|---------------|--------------------------|-------------------|------------------------|----------------------|------|-----------------------------------------------------------------------------------------------------------------|--|
|                                     | At birth | After birth |               |                          |                   |                        |                      |      |                                                                                                                 |  |
| Clinical assessment for signs of CS | 1        |             | Staff time    | Consultant paediatrician | 30                | 108.00                 | 54.00                | [11] |                                                                                                                 |  |
| Review of test results              |          | 6           | Staff time    | Consultant paediatrician | 10 per review     | 108.00                 | 108.00               | [11] |                                                                                                                 |  |
| RPR/VDRL blood test                 | 1        | 2           | Staff time    | Blood taken by nurse     | 10 per test       | 45.00                  | 22.50                | [11] | Tests every three months until RPR is negative (this usually occurs by six months). Cost based on band 6 nurse. |  |
| IgM EIA blood test                  | 1        | 2           | Staff time    | Blood taken by nurse     | 10 per test       | 45.00                  | 22.50                | [11] |                                                                                                                 |  |
| Syphilis blood tests (as above)     | 2        | 4           | Diagnostics   | Laboratory tests         | 3 sets of tests   | 12.75                  | 38.25                | [10] | Based on average combined cost for tests.                                                                       |  |
| <b>Total cost</b>                   |          |             |               |                          |                   |                        | <b>£245.25</b>       |      |                                                                                                                 |  |

CS, congenital syphilis; IgM EIA, immunoglobulin M enzyme immunoassay; RPR/VDRL, rapid plasma reagent/veneral disease research lab test.

**Table S15. Long-term health care and social care costs associated with congenital syphilis (CS) – results of the model comparing universal repeat screening of syphilis in late pregnancy with single screening**

|                         | Short-term costs<br>[Antenatal +<br>postnatal] | Long-term<br>costs <sup>1</sup> | Lifetime costs<br>[short + long-<br>term] | Total QALYs |
|-------------------------|------------------------------------------------|---------------------------------|-------------------------------------------|-------------|
| Single screen           | £1,777,469,008                                 | £5,754,176                      | £1,783,223,184                            | 19,464,817  |
| Universal repeat screen | £1,787,355,870                                 | £2,160,086                      | £1,789,515,957                            | 19,464,869  |
| Difference              | £9,886,863                                     | -£3,594,090                     | £6,292,773                                | 52.2        |
| ICER                    |                                                |                                 |                                           | £120,494    |

ICER, Incremental cost-effectiveness ratio. Lifetime costs and utilities were discounted at 3.5%. Data presented are for all women screened for syphilis in one year (n=725,891)

<sup>1</sup>Additional lifetime health and social care costs for individuals born with CS (£651,387 per individual) - adapted from a study of lifetime costs of cerebral palsy in Denmark [18]. The social care costs include specialised schooling, and after school care, support to parents, residential institutions, supervised workshops, day centre, and other adult support services.

**Table S16. Clinical outcomes for Scenario 3 (0.00012 probability of syphilis infection in pregnancy)**

| Strategy                   | Syphilis antenatal screens | Women treated for syphilis | False positive screens | Intrauterine fetal demise | Preterm deliveries | Neonatal deaths | Congenital syphilis |
|----------------------------|----------------------------|----------------------------|------------------------|---------------------------|--------------------|-----------------|---------------------|
| Existing: single screen    | 725,891                    | 1,709                      | 1,451                  | 2,906.1                   | 54,240             | 1,447           | 43.2                |
| Alternative: repeat screen | 1,411,696                  | 3,163                      | 2,823                  | 2,904.3                   | 54,226             | 1,446           | 4.2                 |
| Difference                 | 685,805                    | 1,455                      | 1,371                  | -1.8                      | -13                | -0.9            | -39.0               |

**Table S17. Cost outcomes for Scenario 3 (0.00012 probability of syphilis infection in pregnancy)**

| Cost                       | Total           | Antenatal screening | Syphilis treatment (in pregnant women) | Perinatal costs |
|----------------------------|-----------------|---------------------|----------------------------------------|-----------------|
| Existing: single screen    | £ 1,777,764,124 | £ 9,697,904         | £ 536,669                              | £ 1,767,529,551 |
| Alternative: repeat screen | £ 1,787,402,601 | £ 18,860,259        | £ 993,521                              | £ 1,767,548,821 |
| Difference                 | £ 9,638,476     | £ 9,162,355         | £ 456,852                              | £ 19,270        |

**Table S18. Requirements to prevent one outcome for Scenario 3 (0.00012 probability of syphilis infection in pregnancy)**

| Outcome             | Cost        | Women screened in third trimester | Women treated for syphilis – TP and FP | Additional false positives |
|---------------------|-------------|-----------------------------------|----------------------------------------|----------------------------|
| Congenital syphilis | £247,284    | 17,595                            | 37                                     | 35                         |
| IUFD                | £5,332,625  | 379,431                           | 805                                    | 759                        |
| Neonatal death      | £11,063,507 | 787,200                           | 1,670                                  | 1,574                      |

TP, True positive; FP, False positive

**Table S19. Short and long-term cost outcomes for Scenario 3 (higher syphilis incidence in pregnancy)**

| Syphilis incidence<br>(new infections<br>between screens) |         | Screening<br>Strategy | Short-term costs | Pregnancy outcomes |          |                   |                        | Short-term<br>cost per CS<br>case<br>prevented | Lifetime<br>health and<br>social care<br>costs<br><br>ICER |
|-----------------------------------------------------------|---------|-----------------------|------------------|--------------------|----------|-------------------|------------------------|------------------------------------------------|------------------------------------------------------------|
| Probability (%)                                           |         |                       |                  | IUFD               | Preterm  | Neonatal<br>death | Congenital<br>syphilis |                                                |                                                            |
| 0.00003                                                   | (0.003) | Single                | £1,777,506,256   | 2,904.6            | 54,229.9 | 1,446.6           | 13.2                   |                                                |                                                            |
|                                                           |         | Repeat                | £1,787,361,768   | 2,904.1            | 54,226.5 | 1,446.4           | 3.4                    |                                                |                                                            |
|                                                           |         | Difference            | £9,855,513       | -0.5               | -3.4     | -0.2              | -9.7                   | £1,011,791                                     | £38,140                                                    |
| 0.00004                                                   | (0.004) | Single                | £1,777,534,908   | 2,904.8            | 54,231.0 | 1,446.7           | 16.5                   |                                                |                                                            |
|                                                           |         | Repeat                | £1,787,366,305   | 2,904.1            | 54,226.4 | 1,446.4           | 3.5                    |                                                |                                                            |
|                                                           |         | Difference            | £9,831,398       | -0.6               | -4.5     | -0.3              | -13.0                  | £756,892                                       | £11,171                                                    |
| 0.00005                                                   | (0.005) | Single                | £1,777,563,560   | 2,904.9            | 54,232.1 | 1,446.8           | 19.8                   |                                                |                                                            |
|                                                           |         | Repeat                | £1,787,370,842   | 2,904.2            | 54,226.4 | 1,446.4           | 3.6                    |                                                |                                                            |
|                                                           |         | Difference            | £9,807,283       | -0.8               | -5.7     | -0.4              | -16.2                  | £603,983                                       | Cost saving                                                |
| 0.00006                                                   | (0.006) | Single                | £1,777,592,212   | 2,905.1            | 54,233.1 | 1,446.9           | 23.2                   |                                                |                                                            |
|                                                           |         | Repeat                | £1,787,375,379   | 2,904.2            | 54,226.4 | 1,446.4           | 3.7                    |                                                |                                                            |
|                                                           |         | Difference            | £9,783,167       | -0.9               | -6.8     | -0.4              | -19.5                  | £502,056                                       | Cost saving                                                |
| 0.00007                                                   | (0.007) | Single                | £1,777,620,864   | 2,905.2            | 54,234.2 | 1,446.9           | 26.5                   |                                                |                                                            |
|                                                           |         | Repeat                | £1,787,379,916   | 2,904.2            | 54,226.4 | 1,446.4           | 3.8                    |                                                |                                                            |
|                                                           |         | Difference            | £9,759,052       | -1.1               | -7.9     | -0.5              | -22.7                  | £429,258                                       | Cost saving                                                |
| 0.00008                                                   | (0.008) | Single                | £1,777,649,516   | 2,905.4            | 54,235.3 | 1,447.0           | 29.9                   |                                                |                                                            |
|                                                           |         | Repeat                | £1,787,384,453   | 2,904.2            | 54,226.3 | 1,446.4           | 3.9                    |                                                |                                                            |
|                                                           |         | Difference            | £9,734,937       | -1.2               | -9.0     | -0.6              | -26.0                  | £374,662                                       | Cost saving                                                |

Table continued over the page.

Table S19. Continued from previous page.

| Syphilis incidence<br>(new infections<br>between screens) |  | Screening<br>Strategy | Short-term costs | Pregnancy outcomes |          |                   |                        | Short-term<br>cost per CS<br>case<br>prevented | Lifetime<br>health and<br>social care<br>costs |
|-----------------------------------------------------------|--|-----------------------|------------------|--------------------|----------|-------------------|------------------------|------------------------------------------------|------------------------------------------------|
|                                                           |  |                       |                  | IUFD               | Preterm  | Neonatal<br>death | Congenital<br>syphilis |                                                | ICER                                           |
| 0.00009<br>(0.009)                                        |  | Single                | £1,777,678,168   | 2,905.6            | 54,236.4 | 1,447.1           | 33.2                   | £332,201                                       | Cost saving                                    |
|                                                           |  | Repeat                | £1,787,388,990   | 2,904.2            | 54,226.3 | 1,446.4           | 4.0                    |                                                |                                                |
|                                                           |  | Difference            | £9,710,822       | -1.4               | -10.1    | -0.7              | -29.2                  |                                                |                                                |
| 0.0001<br>(0.01)                                          |  | Single                | £1,777,706,820   | 2,905.7            | 54,237.5 | 1,447.2           | 36.5                   | £298,234                                       | Cost saving                                    |
|                                                           |  | Repeat                | £1,787,393,527   | 2,904.2            | 54,226.3 | 1,446.4           | 4.1                    |                                                |                                                |
|                                                           |  | Difference            | £9,686,707       | -1.5               | -11.2    | -0.7              | -32.5                  |                                                |                                                |
| 0.00011<br>(0.011)                                        |  | Single                | £1,777,735,472   | 2,905.9            | 54,238.6 | 1,447.3           | 39.9                   | £270,443                                       | Cost saving                                    |
|                                                           |  | Repeat                | £1,787,398,064   | 2,904.3            | 54,226.3 | 1,446.5           | 4.1                    |                                                |                                                |
|                                                           |  | Difference            | £9,662,592       | -1.7               | -12.4    | -0.8              | -35.7                  |                                                |                                                |
| 0.00012<br>(0.012)                                        |  | Single                | £1,777,764,124   | 2,906.1            | 54,239.7 | 1,447.3           | 43.2                   | £247,284                                       | Cost saving                                    |
|                                                           |  | Repeat                | £1,787,402,601   | 2,904.3            | 54,226.2 | 1,446.5           | 4.2                    |                                                |                                                |
|                                                           |  | Difference            | £9,638,476       | -1.8               | -13.5    | -0.9              | -39.0                  |                                                |                                                |

CS, congenital syphilis; ICER, IUFD, Intrauterine foetal demise; ICER, Incremental cost-effectiveness ratio. Lifetime costs and utilities were discounted at 3.5%.

<sup>1</sup>Lifetime health and social care costs adapted from a study of lifetime costs of cerebral palsy in Denmark [18]. The social care costs include specialised schooling, and after school care, support to parents, residential institutions, supervised workshops, day centre, and other adult support services.

**Table S20. Cost per screen needed to meet NICE ICER thresholds (Scenario 7)**

| Threshold of interest                                 | Per screen cost required to achieve threshold | Incremental cost-effectiveness ratio (ICER) | Additional short-term cost (repeat screen vs. single screen) | Cost per CS case avoided (short-term cost) |
|-------------------------------------------------------|-----------------------------------------------|---------------------------------------------|--------------------------------------------------------------|--------------------------------------------|
| Long-term health and social care costs and utilities  |                                               |                                             |                                                              |                                            |
| £100k ICER threshold                                  | £11.79                                        | £99,877.04                                  | £8,810,149                                                   | £1,596,738                                 |
| £30k ICER threshold                                   | £6.46                                         | £29,884.61                                  | £5,154,808                                                   | £934,250                                   |
| £20k ICER threshold                                   | £5.70                                         | £19,904.45                                  | £4,633,596                                                   | £839,786                                   |
| Per screen cost half the baseline value (used in DSA) | £6.68                                         | £32,773.60                                  | £5,305,685                                                   | £961,594                                   |

CS, congenital syphilis; DSA, deterministic sensitivity analysis. ICERs were calculated using the additional lifetime health and social care cost of CS (£651,387) as used in Scenario 1 adapted from a study of lifetime costs of cerebral palsy in Denmark [18]. Per screen cost was calculated to the nearest penny. Lifetime costs and utilities were discounted at 3.5%.



## References

- 1 Kingston M, French P, Higgins S, *et al.* UK national guidelines on the management of syphilis 2015. *Int J STD AIDS* 2016;**27**:421–46. doi:10.1177/0956462415624059
- 2 Qin J, Yang T, Xiao S, *et al.* Reported Estimates of Adverse Pregnancy Outcomes among Women with and without Syphilis: A Systematic Review and Meta-Analysis. *PLoS ONE* 2014;**9**:e102203. doi:10.1371/journal.pone.0102203
- 3 Townsend CL, Francis K, Peckham CS, *et al.* Syphilis screening in pregnancy in the United Kingdom, 2010–2011: a national surveillance study. *BJOG* 2017;**124**:79–86. doi:10.1111/1471-0528.14053
- 4 Simms I, Tookey PA, Goh BT, *et al.* The incidence of congenital syphilis in the United Kingdom: February 2010 to January 2015. *BJOG* 2017;**124**:72–7. doi:10.1111/1471-0528.13950
- 5 MBRRACE-UK. Perinatal Mortality Surveillance Report. UK Perinatal Deaths for Births from January to December 2016. [www.npeu.ox.ac.uk](http://www.npeu.ox.ac.uk) (Accessed 12 Mar 2020).
- 6 NHS Digital. NHS Maternity Statistics, England 2017–18. 2018. <https://digital.nhs.uk/data-and-information/publications/statistical/nhs-maternity-statistics/2017-18> (Accessed 12 Mar 2020).
- 7 Northern Ireland Maternity System data provided on request from the Public Health Agency (Health Intelligence Unit), Northern Ireland. July 2018.
- 8 Data provided on request by ISD NHS Scotland’s Population Health: Maternity, Sexual Health and Unintentional Injuries Team. July 2018.
- 9 Data provided on request by the Welsh Government’s Knowledge and Analytic Services, Health & Social Services Group. July 2018.
- 10 Pathway Analytics. Integrated Sexual Health Tariff - London ISHT 2017/2018. <https://www.pathwayanalytics.com/> (Accessed 12 Mar 2020).
- 11 Curtis, L. & Burns, A. (2018) Unit Costs of Health and Social Care 2018, Personal Social Services Research Unit, University of Kent, Canterbury. <https://www.pssru.ac.uk/project-pages/unit-costs/unit-costs-2018/> (Accessed 12 Mar 2020).

- 1  
2  
3 12 Campbell H, Kurinczuk J, Heazell A, *et al*. Healthcare and wider societal implications of stillbirth:  
4 a population-based cost-of-illness study. *BJOG: Int J Obstet Gy* 2018;**125**:108–17.  
5 doi:10.1111/1471-0528.14972  
6  
7  
8  
9 13 NHS Improvement. 2017/18 National Prices and National tariff workbook. 2017.  
10 <https://improvement.nhs.uk/resources/national-tariff-1719/> (Accessed 12 Mar 2020).  
11  
12  
13 14 NHS Improvement. Non mandatory currencies and prices 2017/2018. 2017.  
14 <https://improvement.nhs.uk/resources/national-tariff-1719/> (Accessed 12 Mar 2020).  
15  
16  
17 15 BNF: British National Formulary - NICE. <https://bnf.nice.org.uk/> (Accessed 12 Mar 2020).  
18  
19  
20 16 WHO Child Growth Standards. [http://www.who.int/childgrowth/standards/weight\\_for\\_age/en/](http://www.who.int/childgrowth/standards/weight_for_age/en/)  
21 (Accessed 12 Mar 2020).  
22  
23  
24 17 Owusu-Edusei KJ, Introcaso CE, Chesson HW. Hospitalization Cost of Congenital Syphilis  
25 Diagnosis From Insurance Claims Data in the United States. *Sexually Transmitted Diseases*  
26 2013;**40**:226. doi:10.1097/OLQ.0b013e31827c5b9f  
27  
28  
29 18 Kruse M, Michelsen SI, Flachs EM, *et al*. Lifetime costs of cerebral palsy. *Developmental*  
30 *Medicine & Child Neurology* 2009;**51**:622–8. doi:10.1111/j.1469-8749.2008.03190.x  
31  
32  
33 19 ONS. Analysis of population estimates tool - Office for National Statistics. 2019.  
34 <https://www.ons.gov.uk/peoplepopulationandcommunity/populationandmigration/population>  
35 [estimates/datasets/analysisofpopulationestimatestool](https://www.ons.gov.uk/peoplepopulationandcommunity/populationandmigration/population) (Accessed 12 Mar 2020).  
36  
37  
38  
39 20 Welsh Government, Statistics for Wales. Maternity statistics, Wales 2017-18. Welsh  
40 Government 2018. <https://gov.wales/maternity-statistics-april-2017-march-2018> (Accessed 12  
41 Mar 2020).  
42  
43  
44  
45  
46  
47  
48  
49  
50  
51  
52  
53  
54  
55  
56  
57  
58  
59  
60

## CHEERS Checklist

### Items to include when reporting economic evaluations of health interventions

The **ISPOR CHEERS Task Force Report**, *Consolidated Health Economic Evaluation Reporting Standards (CHEERS)—Explanation and Elaboration: A Report of the ISPOR Health Economic Evaluations Publication Guidelines Good Reporting Practices Task Force*, provides examples and further discussion of the 24-item CHEERS Checklist and the CHEERS Statement. It may be accessed via the *Value in Health* or via the ISPOR Health Economic Evaluation Publication Guidelines – CHEERS: Good Reporting Practices webpage: <http://www.ispor.org/TaskForces/EconomicPubGuidelines.asp>

| Section/item                    | Item No | Recommendation                                                                                                                                                                             | Reported on page No/<br>line No |
|---------------------------------|---------|--------------------------------------------------------------------------------------------------------------------------------------------------------------------------------------------|---------------------------------|
| <b>Title and abstract</b>       |         |                                                                                                                                                                                            |                                 |
| Title                           | 1       | Identify the study as an economic evaluation or use more specific terms such as “cost-effectiveness analysis”, and describe the interventions compared.                                    | Page 1, Title                   |
| Abstract                        | 2       | Provide a structured summary of objectives, perspective, setting, methods (including study design and inputs), results (including base case and uncertainty analyses), and conclusions.    | Page 2, Abstract                |
| <b>Introduction</b>             |         |                                                                                                                                                                                            |                                 |
| Background and objectives       | 3       | Provide an explicit statement of the broader context for the study.<br>Present the study question and its relevance for health policy or practice decisions.                               | Page 5, Para 3                  |
| <b>Methods</b>                  |         |                                                                                                                                                                                            |                                 |
| Target population and subgroups | 4       | Describe characteristics of the base case population and subgroups analysed, including why they were chosen.                                                                               | Page 7, Line 1                  |
| Setting and location            | 5       | State relevant aspects of the system(s) in which the decision(s) need(s) to be made.                                                                                                       | Page 5, Para 3                  |
| Study perspective               | 6       | Describe the perspective of the study and relate this to the costs being evaluated.                                                                                                        | Page 7, Line 4                  |
| Comparators                     | 7       | Describe the interventions or strategies being compared and state why they were chosen.                                                                                                    | Page 5, Para 2&3                |
| Time horizon                    | 8       | State the time horizon(s) over which costs and consequences are being evaluated and say why appropriate.                                                                                   | Page 5, Para 3                  |
| Discount rate                   | 9       | Report the choice of discount rate(s) used for costs and outcomes and say why appropriate.                                                                                                 | Page 5, Para 3                  |
| Choice of health outcomes       | 10      | Describe what outcomes were used as the measure(s) of benefit in the evaluation and their relevance for the type of analysis performed.                                                    | Page 11, Line 10                |
| Measurement of effectiveness    | 11a     | <i>Single study-based estimates:</i> Describe fully the design features of the single effectiveness study and why the single study was a sufficient source of clinical effectiveness data. |                                 |

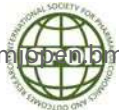

|                                                                                                                                                                                                                                                                                                                                                             |                                                                                                                                                                                                                                                                                                                                                                |                                                                                                                                                                                                                                                                                                                                                                                                                                                                                                                                                                                                                                                                                                                                                                                                                                                                                                                                                                                                                                                                                                                                                                                                                                                                                                                                                                                                                                                                                                                                                                                                                                                                                                                                                                                                                                                                                                                                                                                                                                                                                                                                                                                                                                                                                                                                                                                                                                                                                                                                                                                                                |                                                                                                                                                                                                                                                                                                                                                                |
|-------------------------------------------------------------------------------------------------------------------------------------------------------------------------------------------------------------------------------------------------------------------------------------------------------------------------------------------------------------|----------------------------------------------------------------------------------------------------------------------------------------------------------------------------------------------------------------------------------------------------------------------------------------------------------------------------------------------------------------|----------------------------------------------------------------------------------------------------------------------------------------------------------------------------------------------------------------------------------------------------------------------------------------------------------------------------------------------------------------------------------------------------------------------------------------------------------------------------------------------------------------------------------------------------------------------------------------------------------------------------------------------------------------------------------------------------------------------------------------------------------------------------------------------------------------------------------------------------------------------------------------------------------------------------------------------------------------------------------------------------------------------------------------------------------------------------------------------------------------------------------------------------------------------------------------------------------------------------------------------------------------------------------------------------------------------------------------------------------------------------------------------------------------------------------------------------------------------------------------------------------------------------------------------------------------------------------------------------------------------------------------------------------------------------------------------------------------------------------------------------------------------------------------------------------------------------------------------------------------------------------------------------------------------------------------------------------------------------------------------------------------------------------------------------------------------------------------------------------------------------------------------------------------------------------------------------------------------------------------------------------------------------------------------------------------------------------------------------------------------------------------------------------------------------------------------------------------------------------------------------------------------------------------------------------------------------------------------------------------|----------------------------------------------------------------------------------------------------------------------------------------------------------------------------------------------------------------------------------------------------------------------------------------------------------------------------------------------------------------|
| 1<br>2<br>3<br>4<br>5<br>6<br>7<br>8<br>9<br>10<br>11<br>12<br>13<br>14<br>15<br>16<br>17<br>18<br>19<br>20<br>21<br>22<br>23<br>24<br>25<br>26<br>27<br>28<br>29<br>30<br>31<br>32<br>33<br>34<br>35<br>36<br>37<br>38<br>39<br>40<br>41<br>42<br>43<br>44<br>45<br>46<br>47<br>48<br>49<br>50<br>51<br>52<br>53<br>54<br>55<br>56<br>57<br>58<br>59<br>60 | <p>Measurement and valuation of preference based outcomes</p> <p>Estimating resources and costs</p><br><p>Currency, price date, and conversion</p><br><p>Choice of model</p><br><p>Assumptions</p><br><p>Analytical methods</p><br><p><b>Results</b></p> <p>Study parameters</p><br><p>Incremental costs and outcomes</p><br><p>Characterising uncertainty</p> | <p>11b <i>Synthesis-based estimates</i>: Describe fully the methods used for identification of included studies and synthesis of clinical effectiveness data.</p> <p>12 If applicable, describe the population and methods used to elicit preferences for outcomes.</p> <p>13a <i>Single study-based economic evaluation</i>: Describe approaches used to estimate resource use associated with the alternative interventions. Describe primary or secondary research methods for valuing each resource item in terms of its unit cost. Describe any adjustments made to approximate to opportunity costs.</p> <p>13b <i>Model-based economic evaluation</i>: Describe approaches and data sources used to estimate resource use associated with model health states. Describe primary or secondary research methods for valuing each resource item in terms of its unit cost. Describe any adjustments made to approximate to opportunity costs.</p> <p>14 Report the dates of the estimated resource quantities and unit costs. Describe methods for adjusting estimated unit costs to the year of reported costs if necessary. Describe methods for converting costs into a common currency base and the exchange rate.</p> <p>15 Describe and give reasons for the specific type of decision-analytical model used. Providing a figure to show model structure is strongly recommended.</p> <p>16 Describe all structural or other assumptions underpinning the decision-analytical model.</p> <p>17 Describe all analytical methods supporting the evaluation. This could include methods for dealing with skewed, missing, or censored data; extrapolation methods; methods for pooling data; approaches to validate or make adjustments (such as half cycle corrections) to a model; and methods for handling population heterogeneity and uncertainty.</p> <p>18 Report the values, ranges, references, and, if used, probability distributions for all parameters. Report reasons or sources for distributions used to represent uncertainty where appropriate. Providing a table to show the input values is strongly recommended.</p> <p>19 For each intervention, report mean values for the main categories of estimated costs and outcomes of interest, as well as mean differences between the comparator groups. If applicable, report incremental cost-effectiveness ratios.</p> <p>20a <i>Single study-based economic evaluation</i>: Describe the effects of sampling uncertainty for the estimated incremental cost and incremental effectiveness parameters, together with the impact</p> | <hr/> <p>Page 7, Para2<br/>Supplementary<br/>material</p> <hr/> <p>Page 8/9 Table<br/>1.</p> <hr/> <p>Page 7 Final<br/>paragraph</p> <hr/> <p>Page 6 Para 1<br/>and Figure 1 &amp;<br/>Figure S1.</p> <p>Supplementary Table<br/>S1.</p> <p>Sensitivity and<br/>Scenario analysis p10.</p> <hr/> <p>Page 8/9 Table 1.</p> <hr/> <p>Page 8/9 Table 1.</p> <hr/> |
|-------------------------------------------------------------------------------------------------------------------------------------------------------------------------------------------------------------------------------------------------------------------------------------------------------------------------------------------------------------|----------------------------------------------------------------------------------------------------------------------------------------------------------------------------------------------------------------------------------------------------------------------------------------------------------------------------------------------------------------|----------------------------------------------------------------------------------------------------------------------------------------------------------------------------------------------------------------------------------------------------------------------------------------------------------------------------------------------------------------------------------------------------------------------------------------------------------------------------------------------------------------------------------------------------------------------------------------------------------------------------------------------------------------------------------------------------------------------------------------------------------------------------------------------------------------------------------------------------------------------------------------------------------------------------------------------------------------------------------------------------------------------------------------------------------------------------------------------------------------------------------------------------------------------------------------------------------------------------------------------------------------------------------------------------------------------------------------------------------------------------------------------------------------------------------------------------------------------------------------------------------------------------------------------------------------------------------------------------------------------------------------------------------------------------------------------------------------------------------------------------------------------------------------------------------------------------------------------------------------------------------------------------------------------------------------------------------------------------------------------------------------------------------------------------------------------------------------------------------------------------------------------------------------------------------------------------------------------------------------------------------------------------------------------------------------------------------------------------------------------------------------------------------------------------------------------------------------------------------------------------------------------------------------------------------------------------------------------------------------|----------------------------------------------------------------------------------------------------------------------------------------------------------------------------------------------------------------------------------------------------------------------------------------------------------------------------------------------------------------|

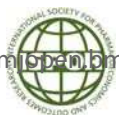

|    |                                                                      |                                                                                                                                                                                                                                                                               |            |
|----|----------------------------------------------------------------------|-------------------------------------------------------------------------------------------------------------------------------------------------------------------------------------------------------------------------------------------------------------------------------|------------|
| 1  |                                                                      | of methodological assumptions (such as discount rate, study perspective).                                                                                                                                                                                                     |            |
| 2  |                                                                      |                                                                                                                                                                                                                                                                               |            |
| 3  |                                                                      |                                                                                                                                                                                                                                                                               |            |
| 4  |                                                                      | 20b <i>Model-based economic evaluation</i> : Describe the effects on the results of uncertainty for all input parameters, and uncertainty related to the structure of the model and assumptions.                                                                              | Page 15.   |
| 5  |                                                                      |                                                                                                                                                                                                                                                                               |            |
| 6  |                                                                      |                                                                                                                                                                                                                                                                               |            |
| 7  | Characterising heterogeneity                                         | 21 If applicable, report differences in costs, outcomes, or cost-effectiveness that can be explained by variations between subgroups of patients with different baseline characteristics or other observed variability in effects that are not reducible by more information. |            |
| 8  |                                                                      |                                                                                                                                                                                                                                                                               |            |
| 9  |                                                                      |                                                                                                                                                                                                                                                                               |            |
| 10 |                                                                      |                                                                                                                                                                                                                                                                               |            |
| 11 |                                                                      |                                                                                                                                                                                                                                                                               |            |
| 12 |                                                                      |                                                                                                                                                                                                                                                                               |            |
| 13 | <b>Discussion</b>                                                    |                                                                                                                                                                                                                                                                               |            |
| 14 | Study findings, limitations, generalisability, and current knowledge | 22 Summarise key study findings and describe how they support the conclusions reached. Discuss limitations and the generalisability of the findings and how the findings fit with current knowledge.                                                                          | Discussion |
| 15 |                                                                      |                                                                                                                                                                                                                                                                               |            |
| 16 |                                                                      |                                                                                                                                                                                                                                                                               |            |
| 17 |                                                                      |                                                                                                                                                                                                                                                                               |            |
| 18 |                                                                      |                                                                                                                                                                                                                                                                               |            |
| 19 | <b>Other</b>                                                         |                                                                                                                                                                                                                                                                               |            |
| 20 |                                                                      |                                                                                                                                                                                                                                                                               |            |
| 21 |                                                                      |                                                                                                                                                                                                                                                                               |            |
| 22 | Source of funding                                                    | 23 Describe how the study was funded and the role of the funder in the identification, design, conduct, and reporting of the analysis. Describe other non-monetary sources of support.                                                                                        | Page 20    |
| 23 |                                                                      |                                                                                                                                                                                                                                                                               |            |
| 24 |                                                                      |                                                                                                                                                                                                                                                                               |            |
| 25 | Conflicts of interest                                                | 24 Describe any potential for conflict of interest of study contributors in accordance with journal policy. In the absence of a journal policy, we recommend authors comply with International Committee of Medical Journal Editors recommendations.                          | Page 20    |
| 26 |                                                                      |                                                                                                                                                                                                                                                                               |            |
| 27 |                                                                      |                                                                                                                                                                                                                                                                               |            |
| 28 |                                                                      |                                                                                                                                                                                                                                                                               |            |
| 29 |                                                                      |                                                                                                                                                                                                                                                                               |            |
| 30 |                                                                      |                                                                                                                                                                                                                                                                               |            |

For consistency, the CHEERS Statement checklist format is based on the format of the CONSORT statement checklist

The **ISPOR CHEERS Task Force Report** provides examples and further discussion of the 24-item CHEERS Checklist and the CHEERS Statement. It may be accessed via the *Value in Health* link or via the ISPOR Health Economic Evaluation Publication Guidelines – CHEERS: Good Reporting Practices webpage: <http://www.ispor.org/TaskForces/EconomicPubGuidelines.asp>

The citation for the CHEERS Task Force Report is:

Husereau D, Drummond M, Petrou S, et al. Consolidated health economic evaluation reporting standards (CHEERS)—Explanation and elaboration: A report of the ISPOR health economic evaluations publication guidelines good reporting practices task force. *Value Health* 2013;16:231-50.

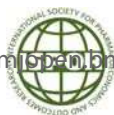

# BMJ Open

## Repeat screening for syphilis in pregnancy as an alternative screening strategy in the United Kingdom: a cost-effectiveness analysis.

|                                 |                                                                                                                                                                                                                                                                                                                                                                                                                                                                                                                                                                                                                                                                                                                    |
|---------------------------------|--------------------------------------------------------------------------------------------------------------------------------------------------------------------------------------------------------------------------------------------------------------------------------------------------------------------------------------------------------------------------------------------------------------------------------------------------------------------------------------------------------------------------------------------------------------------------------------------------------------------------------------------------------------------------------------------------------------------|
| Journal:                        | <i>BMJ Open</i>                                                                                                                                                                                                                                                                                                                                                                                                                                                                                                                                                                                                                                                                                                    |
| Manuscript ID                   | bmjopen-2020-038505.R1                                                                                                                                                                                                                                                                                                                                                                                                                                                                                                                                                                                                                                                                                             |
| Article Type:                   | Original research                                                                                                                                                                                                                                                                                                                                                                                                                                                                                                                                                                                                                                                                                                  |
| Date Submitted by the Author:   | 19-Aug-2020                                                                                                                                                                                                                                                                                                                                                                                                                                                                                                                                                                                                                                                                                                        |
| Complete List of Authors:       | Huntington, Susie; Aquarius Population Health Ltd<br>Weston, Georgie; Aquarius Population Health Limited<br>Seedat, Farah; Public Health England, UK National Screening Committee<br>Marshall, John; Public Health England, UK National Screening Committee<br>Bailey, Heather; University College London, UCL Institute for Global Health<br>Tebruegge, Marc; Evelina London Children's Hospital, Department of Paediatric Infectious Diseases & Immunology; The Royal Children's Hospital Melbourne, Department of Paediatrics<br>Ahmed, Imtyaz; Aquarius Population Health Limited<br>Turner, Katy; University of Bristol, School of Veterinary Science<br>Adams, Elisabeth; Aquarius Population Health Limited |
| <b>Primary Subject Heading</b>: | Health economics                                                                                                                                                                                                                                                                                                                                                                                                                                                                                                                                                                                                                                                                                                   |
| Secondary Subject Heading:      | Public health, Infectious diseases                                                                                                                                                                                                                                                                                                                                                                                                                                                                                                                                                                                                                                                                                 |
| Keywords:                       | HEALTH ECONOMICS, Health policy < HEALTH SERVICES ADMINISTRATION & MANAGEMENT, Public health < INFECTIOUS DISEASES, Prenatal diagnosis < OBSTETRICS                                                                                                                                                                                                                                                                                                                                                                                                                                                                                                                                                                |
|                                 |                                                                                                                                                                                                                                                                                                                                                                                                                                                                                                                                                                                                                                                                                                                    |

SCHOLARONE™  
Manuscripts



I, the Submitting Author has the right to grant and does grant on behalf of all authors of the Work (as defined in the below author licence), an exclusive licence and/or a non-exclusive licence for contributions from authors who are: i) UK Crown employees; ii) where BMJ has agreed a CC-BY licence shall apply, and/or iii) in accordance with the terms applicable for US Federal Government officers or employees acting as part of their official duties; on a worldwide, perpetual, irrevocable, royalty-free basis to BMJ Publishing Group Ltd ("BMJ") its licensees and where the relevant Journal is co-owned by BMJ to the co-owners of the Journal, to publish the Work in this journal and any other BMJ products and to exploit all rights, as set out in our [licence](#).

The Submitting Author accepts and understands that any supply made under these terms is made by BMJ to the Submitting Author unless you are acting as an employee on behalf of your employer or a postgraduate student of an affiliated institution which is paying any applicable article publishing charge ("APC") for Open Access articles. Where the Submitting Author wishes to make the Work available on an Open Access basis (and intends to pay the relevant APC), the terms of reuse of such Open Access shall be governed by a Creative Commons licence – details of these licences and which [Creative Commons](#) licence will apply to this Work are set out in our licence referred to above.

Other than as permitted in any relevant BMJ Author's Self Archiving Policies, I confirm this Work has not been accepted for publication elsewhere, is not being considered for publication elsewhere and does not duplicate material already published. I confirm all authors consent to publication of this Work and authorise the granting of this licence.

1  
2  
3 **Repeat screening for syphilis in pregnancy as an alternative screening strategy in the United**  
4 **Kingdom: a cost-effectiveness analysis**  
5

6  
7 Susie Huntington<sup>1</sup>, Georgie Weston<sup>1</sup>, Farah Seedat<sup>2</sup>, John Marshall<sup>2</sup>, Heather Bailey<sup>3</sup>, Marc  
8 Tebruegge<sup>4-6</sup>, Imtyaz Ahmed<sup>1</sup>, Katy Turner<sup>7</sup>, Elisabeth Adams<sup>1</sup>.  
9  
10

- 11  
12 1. Aquarius Population Health Limited, London, UK  
13  
14 2. UK National Screening Committee, Floor 5, Wellington House, 133-155 Waterloo Road, London,  
15 SE1 8UG, UK  
16  
17 3. UCL Institute for Global Health, London, UK  
18  
19 4. Department of Paediatric Infectious Diseases & Immunology, Evelina London Children's Hospital,  
20 Guy's and St. Thomas' NHS Foundation Trust, London, UK.  
21  
22 5. Department of Paediatrics, Royal Children's Hospital Melbourne, University of Melbourne,  
23 Melbourne, Australia.  
24  
25 6. Department of Infection, Immunity & Inflammation, UCL Great Ormond Street Institute of Child  
26 Health, University College London, London, UK.  
27  
28 7. School of Veterinary Science, University of Bristol, Bristol, UK.  
29  
30

31  
32 Author's ORCID IDs: SH 0000-0002-2854-7441; GW 0000-0003-3019-7150; FS 0000-0002-3563-7875;  
33 JM 0000-0002-6239-774X; HB 0000-0003-3266-1041; KT 0000-0002-8152-6017.  
34  
35

36  
37 Correspondence: Dr Susie Huntington. Aquarius Population Health Limited, Unit 29 Tileyard Studios,  
38 London, N7 9AH, UK. susie.huntington@aquariusph.com  
39  
40

41  
42  
43  
44 **Word count: 4250.**  
45  
46  
47  
48  
49  
50  
51  
52  
53  
54  
55  
56  
57  
58  
59  
60



## Abstract

**Objectives:** To assess the cost-effectiveness of universal repeat screening for syphilis in late pregnancy, compared with the current strategy of single screening in early pregnancy with repeat screening offered only to high-risk women.

**Design:** A decision tree model was developed to assess the incremental costs and health benefits of the two screening strategies. The base case analysis considered short-term costs during pregnancy and the initial weeks after delivery. Deterministic and probabilistic sensitivity analyses and scenario analyses were conducted to assess the robustness of the results.

**Setting:** UK antenatal screening programme.

**Population:** Hypothetical cohort of pregnant women who access antenatal care and receive a syphilis screen in one year.

**Primary and secondary outcome measures:** The primary outcome was the cost to avoid one case of congenital syphilis (CS). Secondary outcomes were the cost to avoid one case of intrauterine fetal demise (IUFD) or neonatal death and the number of women needing to be screened/treated to avoid one case of CS, IUFD or neonatal death. The cost per quality-adjusted life year (QALY) gained was assessed in scenario analyses.

**Results:** Base case results indicated that for pregnant women in the UK (n=725,891), the repeat screening strategy would result in 5.5 fewer cases of CS (from 8.8 to 3.3), 0.1 fewer cases of neonatal death, and 0.3 fewer cases of IUFD annually compared to the single screening strategy. This equates to an additional £1.8 million per case of CS prevented. When lifetime horizon was considered, the incremental cost-effectiveness ratio (ICER) for the repeat screening strategy was £120,494.

**Conclusions:** Universal repeat screening for syphilis in pregnancy is unlikely to be cost-effective in the current UK setting where syphilis prevalence is low. Repeat screening may be cost-effective in countries with a higher syphilis incidence in pregnancy, particularly if the cost per screen is low.

### Strengths and limitations of this study

- This is the first health economic analysis to assess the cost-effectiveness of repeat screening strategy for syphilis in pregnancy compared to the single screen strategy within the UK setting.
- Experts provided input to inform the model inputs and validate the model structure and assumptions.
- Extensive sensitivity analyses were performed to assess uncertainty in the results.
- A lack of long-term data on the costs and utilities associated with congenital syphilis meant the focus of the analysis was on the short-term costs and health benefits, with the incremental cost-effectiveness ratio (ICER) being calculated in scenario analyses.

## Introduction

Syphilis is a bacterial sexually transmitted infection (STI) caused by *Treponema pallidum* subspecies *pallidum*. The prevalence of syphilis in the UK is low, however, the number of new diagnoses has increased over the last decade. In women, the number of cases rose from 345 in 2009 to 550 in 2018 [1].

Congenital syphilis (CS) occurs via vertical transmission of syphilis during pregnancy which can occur during any trimester and at any of the four stages of syphilis infection. The highest risk of transmission, however, occurs in primary syphilis when sores or chancres are present. Adverse pregnancy outcomes can include intrauterine fetal demise (IUFD), prematurity and neonatal death, with the risk being considerably higher in women with untreated syphilis than in pregnant women with no syphilis or in pregnant women who receive adequate treatment for syphilis following diagnosis at first trimester screening [2]. The risk of CS is difficult to quantify due to the small number of cases, the wide range of disease presentations and probable underdiagnosis. There is evidence, albeit limited, that the risk of CS is higher if women become infected whilst pregnant than if they have active syphilis at the time of conception [2,3]. In infants born with CS, the infection can cause reduced growth and development, neurological impairment, bone deformities, and hearing loss [4,5]. Infants treated with intravenous benzylpenicillin sodium in the first two months of life are reported to have a good short-term prognosis, but long-term outcomes have not been investigated in detail [6,7].

In the UK, routine antenatal screening for syphilis, hepatitis B and human immunodeficiency virus (HIV) is offered to all pregnant women at their first routine antenatal appointment, usually before 12 weeks gestation, or later, for the small proportion of women who first present in their second or third trimester [8,9]. Women who decline screening are formally re-offered and screening coverage currently exceeds 99.6% [9–11]. Blood samples are initially tested using an enzyme immunoassay (EIA) with a *T. pallidum* particle agglutination assay (TPPA) performed on the same specimen to confirm a positive result. Women with a positive TPPA result are referred to a sexual health clinic to assess whether they have an active infection which requires treatment or a previous infection not requiring treatment. It is possible that women who screen negative for syphilis become positive later in pregnancy, either because they become infected with syphilis, or because their infection was too recent for a detectable antibody response to have been mounted at the time of the first screen. Management guidelines, outside the national screening programme, recommend that women are offered repeat testing for syphilis in late pregnancy if they have been diagnosed and treated for syphilis in the first trimester, if they consider themselves to be at risk of infection, or have a single

1  
2  
3 'high-risk' exposure [11,12]. Assessing women's risk can be problematic and risk can change during  
4 pregnancy. Data on coverage of repeat testing or management is not routinely collected. In 2011-13,  
5 the Surveillance of Antenatal Syphilis Screening (SASS) study was conducted to provide quantitative  
6 data on the performance of the screening pathway [13].  
7  
8  
9

10 Syphilis prevalence in pregnant women is low, the SASS study found that 0.04% (1/2800) of pregnant  
11 women required treatment for syphilis in 2010-2011, although the prevalence may have  
12 subsequently increased [13]. CS incidence is also low and below the WHO elimination threshold of  
13  $\leq 0.5/1000$  [14]. However, between March 2016 and January 2017, four cases of CS occurred in the  
14 UK in women who screened negative for syphilis in pregnancy [15]. None of whom had a repeat  
15 screen during pregnancy, and confirmatory testing later showed that they had acquired syphilis  
16 whilst pregnant. These infections would likely have been diagnosed and treated if repeat screening  
17 in late pregnancy was offered to all pregnant women, an approach that has not been assessed in the  
18 UK. Two models assessed the cost-effectiveness of universal repeat screening in the US, where the  
19 prevalence of syphilis in pregnant women is higher than in the UK. One found that universal repeat  
20 screening was cost saving [16], whilst the other found that it cost \$419,842 per CS case avoided [17].  
21  
22  
23  
24  
25  
26  
27  
28  
29

30 To inform the UK National Screening Committee (UK NSC) and in response to an increase in syphilis  
31 diagnoses in the UK and the continued occurrence of CS cases each year, albeit very small numbers,  
32 the clinical and cost-effectiveness of universal screening in the first and third trimesters, as an  
33 alternative strategy to universal screening in the first trimester only, was assessed.  
34  
35  
36  
37  
38  
39  
40  
41  
42  
43  
44  
45  
46  
47  
48  
49  
50  
51  
52  
53  
54  
55  
56  
57  
58  
59  
60

## Methods

### Model structure

A decision tree model in TreeAge (TreeAge Pro 2019, R2. TreeAge Software, Williamstown, MA, USA) was developed to assess the incremental costs and health benefits of universal repeat screening for antenatal syphilis compared with universal screening in the first trimester only (**Figure 1**). For both screening strategies, the decision tree followed the true disease state of women and the population was split into women screened in the first/second trimester and women screened in the third trimester (i.e. late presenters who would miss the opportunity for repeat screening). Women with a positive result received treatment at a sexual health clinic plus any additional testing required. Each branch (with or without syphilis) ended with the same pregnancy outcomes: IUFD or no IUFD, the latter resulting in a preterm or term delivery and either neonatal death, an infant with CS, or an infant with no CS (online supplement **Figure S1**).

### Figure 1. Overview of decision tree comparing single screening with universal repeat screening of syphilis in pregnancy

Footnote:

PW, pregnant women; FN, false negative result; FP, false positive result; TN, true negative result; TP, true positive result.

With reference to the timing of 1<sup>st</sup> syphilis screen, 'early' refers to 1<sup>st</sup> or 2<sup>nd</sup> trimester and 'late' refers to the third trimester.

Where branches split, the probabilities are shown in the top branch, with # indicating (1-probability). Blue circle indicates referral to specialist management for treatment and the same seven pregnancy outcomes (as is shown in the topmost branch). Each branch ends with the same outcomes, but with different probabilities for each branch. Pregnancy outcomes are presented in **Figure S1** in online supplement.

1  
2  
3 The model included pregnant women in the UK who accessed antenatal care and received a syphilis  
4 screen in 2018 (the latest available data at the time). Pregnant women who were not screened  
5 (0.04%) were not included, since any change to the screening strategy would have no impact on  
6 their outcomes. Costs were considered from the UK healthcare system perspective. Social care costs  
7 were not included in the short-term. To assess the overall impact of the two screening strategies,  
8 the costs for all pregnancy outcomes for all women screened were considered, not just costs for  
9 women with syphilis. The model threshold for early versus late first screen was 28 weeks gestation,  
10 i.e. the start of the third trimester. The time horizon for the base case analysis considered short-  
11 term costs during pregnancy and the perinatal period. Lifetime costs and utilities were not used in  
12 the base case analysis (but were considered in scenario analysis) as the data available on the long-  
13 term costs and utilities associated with CS were limited and include too much uncertainty to provide  
14 a robust result. See **Table S1** for base case model assumptions.  
15  
16  
17  
18  
19  
20  
21  
22  
23  
24  
25

## 26 **Model parameters**

27  
28 Data were sought using PubMed, Google Scholar, online searches, references within papers, from  
29 experts and laboratory contacts and by data request to Public Health Agencies.  
30  
31  
32  
33

### 34 Clinical parameters

35  
36 Key clinical parameters were derived from published data and national surveillance data. Where  
37 data were only available from outside the UK, they were scaled to reflect UK pregnancy outcomes  
38 and syphilis prevalence. See **Table 1** for clinical parameters and methods of estimation.  
39  
40 Furthermore, data from a large meta-analysis [18] were adjusted to the UK setting to estimate the  
41 probability of each pregnancy outcome (online supplement **Tables S2-S5**).  
42  
43  
44  
45  
46  
47

### 48 Cost parameters

49  
50 Cost parameters are presented in **Table 1**. National Health Service (NHS) tariff costs or published  
51 costs from the UK were used where possible. Where no UK data were available, micro-costing was  
52 used to calculate costs - informed by clinical guidelines, expert opinion and incorporating published  
53 NHS costs and tariffs where possible. To estimate the additional lifetime cost of CS, cost estimates  
54 from outside the UK were converted to pound sterling (£) [19]. Where necessary, costs were inflated  
55 to 2017/18 prices using mid-year conversion rates [20].  
56  
57  
58  
59  
60

**Table 1. Clinical and cost parameters for model comparing single screening with universal repeat screening of syphilis in pregnancy in the UK**

|                                                                    | Baseline value | Low       | High    | Distribution | Note                                                                                                                                                                                                                                                                                                                       |
|--------------------------------------------------------------------|----------------|-----------|---------|--------------|----------------------------------------------------------------------------------------------------------------------------------------------------------------------------------------------------------------------------------------------------------------------------------------------------------------------------|
| <b>Clinical parameters</b>                                         |                |           |         |              |                                                                                                                                                                                                                                                                                                                            |
| Total number of women in model (representing one-year)             | 725,891        | -         | -       | -            | Based on number of deliveries in the UK in 2017/2018 and the screening uptake. See <b>Table S6</b> .                                                                                                                                                                                                                       |
| Probability of having syphilis at the start of pregnancy           | 0.00035        | 0.00028   | 0.00042 | Beta         | Data derived from 2011 SASS data [13] (England only [244/691,494]). Assume same risk in other UK countries.                                                                                                                                                                                                                |
| Probability of becoming infected with syphilis during pregnancy    | 0.000017       | 0.0000017 | 0.00012 | Beta         | Incidence was estimated using published incidence and prevalence data from United States scaled to reflect UK prevalence [13,21].                                                                                                                                                                                          |
| Probability of receiving syphilis screen before 28 weeks gestation | 0.947          | 0.936     | 0.984   | Beta         | Estimate based on gestational week at first antenatal attendance. <b>Table S7</b> in online supplement. The low value is in line with results from SASS study [13]. The high value is in line with data from Northern Ireland which (from the UK countries) has the highest proportion of women attending before 28 weeks. |
| Probability of true positive result                                | 0.995          | 0.984     | 1.00    | Beta         | Based on the average test sensitivity of five EIA assays used in the UK. High and low values are based on best and worst test performance of assays used in the UK [22,23].                                                                                                                                                |
| Probability of false negative result <sup>1</sup>                  | 0.005          | 0.016     | 0.00    | Beta         | Based on the average test sensitivity of five EIA assays used in the UK. High and low values are based on best and worst test performance of assays used in the UK [22,23].                                                                                                                                                |
| Probability of true negative result                                | 0.998          | 0.999     | 0.99    | Beta         | Based on average test specificity of five EIA assays (99.8%) used in the UK. High and low are estimates [22,23].                                                                                                                                                                                                           |
| Probability of false positive result <sup>1</sup>                  | 0.002          | 0.001     | 0.01    | Beta         | Based on average test specificity of five EIA assays (99.8%) used in the UK. High and low are estimates [22,23].                                                                                                                                                                                                           |
| <b>Cost parameters</b>                                             |                |           |         |              |                                                                                                                                                                                                                                                                                                                            |
| Syphilis screen                                                    | 13.36          | 6.68      | 26.72   | Gamma        | Estimated using micro-costing. Screening is performed at the same time as other antenatal blood tests – this would also be the case for repeat screening at 28 weeks gestation. See <b>Table S8</b> .                                                                                                                      |

|                                                       | Baseline value | Low      | High     | Distribution | Note                                                                                                                                                                                                                                                                            |
|-------------------------------------------------------|----------------|----------|----------|--------------|---------------------------------------------------------------------------------------------------------------------------------------------------------------------------------------------------------------------------------------------------------------------------------|
| Management women diagnosed with syphilis in pregnancy | 314.09         | 251.27   | 376.91   | Gamma        | Clinical management by sexual health clinician estimate based on London Integrated Sexual Health Tariff [24]. See <b>Table S9</b> .                                                                                                                                             |
| Intrauterine fetal demise (IUFD) <sup>2</sup>         | 4,356.80       | 3,485.44 | 5228.16  | Gamma        | Estimate based on 2013/14 published estimate from UK inflated to 2017/2018 costs [25].                                                                                                                                                                                          |
| Preterm delivery                                      | 7,100.37       | 5,680.30 | 8,520.45 | Gamma        | Estimate based on UK costs for delivery at 32-33 weeks and 34-36 weeks gestation (inflated from 2010/11 costs) [26]. UK data on gestational age at delivery ( <b>Table S10</b> ) were then used to calculate the proportion of deliveries at 32-33 (28%) and 34-36 weeks (72%). |
| Term delivery (37+ weeks)                             | 2,034.62       | 1,627.69 | 2,441.54 | Gamma        | Estimate based on published cost using inflated 2010/11 UK data [26].                                                                                                                                                                                                           |
| Neonatal death <sup>3</sup>                           | 5,805.80       | 4,644.64 | 6,966.96 | Gamma        | Estimated using cost of IUFD plus additional hospital costs. See <b>Table S11</b> .                                                                                                                                                                                             |
| CS testing and treatment                              | 6,607.68       | 5,286.14 | 7,929.21 | Gamma        | Estimated using micro-costing. See <b>Table S12</b> and <b>Table S13</b> .                                                                                                                                                                                                      |
| CS neonatal screen                                    | 245.25         | 196.20   | 294.30   | Gamma        | Screening test for neonates born to women treated for syphilis in pregnancy. Estimated using micro-costing. See <b>Table S14</b> .                                                                                                                                              |
| CS lifetime healthcare cost                           | 80,423.37      | -        | -        | Gamma        | Average additional lifetime healthcare costs attributable to CS based on cost estimate for cerebral palsy (estimate from 2000) [27].                                                                                                                                            |
| CS lifetime health and social care cost               | 651,387.47     | -        | -        | Gamma        | Average additional lifetime health and social costs attributable to CS based on cost estimate for cerebral palsy (estimate from 2000) [27].                                                                                                                                     |

<sup>1</sup>These probabilities refer to the final diagnosis after all diagnostic testing plus discussion with sexual health consultant if diagnostic tests result is positive for treponemal antibodies. <sup>2</sup>IUFD refers to the death of a baby in the uterus at  $\geq 20$  weeks gestation i.e. stillbirth. <sup>3</sup>Neonatal death refers to the death of a baby within the first 28 days after birth. EIA: Enzyme immunoassay. CS, congenital syphilis. For costs, high and low values are +/- 20% of baseline values with exception of syphilis screening cost where high and low values are +/- 50%.



## Outcomes

The primary outcome was cost to avoid one case of CS. Secondary outcomes were: cost to avoid one case of IUFD or neonatal death; the number of women who need to be screened to avoid one case of CS, IUFD or neonatal death; and the number of women who need to be treated for syphilis to avoid one case of CS, IUFD or neonatal death.

## Sensitivity and scenario analyses

A univariate deterministic sensitivity analysis (DSA) was run for all probabilities and costs to determine which parameters had the greatest impact on the outcome of the model. This was done by selecting a high and low value for each input and generating outcomes. A probabilistic sensitivity analysis (PSA) using Monte Carlo simulation (1000 iterations) was used to assess the robustness of the results and calculate 95% credibility intervals (CIs) for each output using the mean and standard deviation. A beta distribution was used for clinical probability inputs, and a gamma distribution for cost inputs (**Table 1**).

As well as the base case analysis, seven scenarios were assessed to observe how changes in model assumptions and certain parameters impacted the main outcomes:

- 1) Lifetime time horizon with incremental cost-effectiveness ratio (ICER) in terms of cost per QALY as the main outcome.
- 2) Incomplete uptake of the repeat screen – where the probability of having a second screen was 99.6%, in line with the current uptake of screening in England.
- 3) Increased syphilis incidence - varying incidence at 10 intervals between the baseline and the high value used in sensitivity analysis (0.012%).
- 4) No late presentation to antenatal care – all women are screened twice in the repeat screening strategy.
- 5) 100% sensitivity and specificity of the syphilis screening process.
- 6) 100% specificity of the repeat screen (i.e. no false positives).
- 7) Examining the per screen cost required to meet the standard National Institute for Health and Care Excellence (NICE) cost-effectiveness threshold of £20,000-£30,000 [28].

In scenario analysis 1, the lifetime healthcare and social care costs for infants born with CS were considered. Since no data on the lifetime cost of CS were available, cerebral palsy (CP) was used as a proxy as it can also lead to a range of disabilities, vary hugely in severity, and may sometimes be a result of CS. The lifetime health and social care costs of CP were taken from a single Danish study [27] adjusted to reflect UK life expectancy and gender split.

1  
2  
3 As EuroQol-5D (EQ-5D) data have not been reported for CS or CP, a utility of 0.74 for infants with CS  
4 relative to a score of 1.00 for infants born with no CS were used, adapted from a 2006 study of new-  
5 born screening strategies where 0.74 was used for infants with 'mild developmental delay' [29].  
6  
7

8 These utility values were used in a similar health economic model from the US [16] and were used to  
9 calculate quality adjusted life-years (QALY). In the absence of data on changes to utility for infants  
10 born with CS, it was assumed that the difference in utility between infants born with CS and infants  
11 with no CS remained constant through childhood and adulthood.  
12  
13  
14

15 Parental HRQoL were not considered as this would add complexity to the model. There are no  
16 published data on many of the utility scores for each of the pregnancy outcomes, for maternal  
17 syphilis diagnosis or receiving a false negative result. These would need to be based on uncertain  
18 estimates or from expert opinion due to limited evidence on HRQoL.  
19  
20  
21

22 The life expectancy of infants with CS was estimated as 70 years, in line with the estimate for CP [27]  
23 and in light of reports of CS diagnoses in a wide range of ages [30]. The life expectancy of infants  
24 with no CS was estimated as 81 years based on current UK data [31]. All costs and utilities were  
25 discounted at 3.5%, in line with NICE guidelines for England [32]. In DSA, discounting of utilities was  
26 varied from 0 to 6%.  
27  
28  
29  
30

### 31 **Patient and public involvement**

32  
33 There was no patient or public involvement (PPI) in the design of the evaluation. A report outlining  
34 the model was reviewed by the UK NSC which has PPI representation and was made available for  
35 public consultation.  
36  
37  
38  
39  
40  
41

## 42 **Results**

### 43 **Base case analysis**

44  
45 The base case results indicate that in one year of screening pregnant women in the UK (n=725,891),  
46 the repeat screening strategy would result in 5.5 fewer cases of CS, 2 fewer cases of preterm  
47 delivery, 0.1 fewer cases of neonatal death (i.e. one less neonatal death every 10 years on average),  
48 and 0.3 fewer cases of IUFD compared to the single screening strategy (**Table 2**).  
49  
50  
51  
52

53  
54 The healthcare costs would be £9,886,863 higher for the repeat screening strategy (£1,777,469,008  
55 vs. £1,787,355,870 respectively when total annual screening costs, treatment costs, and delivery  
56 costs for all pregnant women screened were considered) with most of this increase (£9,162,355)  
57 being a result of the additional screening costs (**Table 3**).  
58  
59  
60

**Table 2. Base case clinical outcomes for model comparing universal repeat screening of syphilis in late pregnancy with single screening**

| Screening strategy                | Syphilis antenatal screens | Women treated for syphilis | False positive maternal syphilis | Intrauterine fetal demise (all causes) <sup>1</sup> | Preterm deliveries (all causes) <sup>1</sup> | Neonatal deaths (all causes) <sup>1</sup> | Congenital syphilis cases |
|-----------------------------------|----------------------------|----------------------------|----------------------------------|-----------------------------------------------------|----------------------------------------------|-------------------------------------------|---------------------------|
| <b>Existing: single screen</b>    |                            |                            |                                  |                                                     |                                              |                                           |                           |
| Estimate                          | 725,891                    | 1,705                      | 1,451                            | 2,904.4                                             | 54,228                                       | 1,446.5                                   | 8.8                       |
| 95% CI <sup>2</sup>               | 725,891-725,891            | 1,698-1,737                | 1,443-1,482                      | 2,890-2,916                                         | 53,905-54,282                                | 1,441-1,457                               | 8.7-8.9                   |
| <b>Alternative: repeat screen</b> |                            |                            |                                  |                                                     |                                              |                                           |                           |
| Estimate                          | 1,411,696                  | 3,089                      | 2,823                            | 2,904.1                                             | 54,226                                       | 1,446.4                                   | 3.3                       |
| 95% CI <sup>2</sup>               | 1,411,456-1,411,503        | 3,074-3,150                | 2,806-2,883                      | 2,889-2,915                                         | 53,903-54,280                                | 1,441-1,457                               | 3.3-3.3                   |
| <b>Difference</b>                 | <b>685,805</b>             | <b>1,384</b>               | <b>1,372</b>                     | <b>-0.3</b>                                         | <b>-2</b>                                    | <b>-0.1</b>                               | <b>-5.5</b>               |

<sup>1</sup>These adverse pregnancy outcomes are all-cause outcomes for all 725,891 women screened, including the small number with syphilis infection.

<sup>2</sup>95% CI, confidence intervals calculated using probabilistic sensitivity analysis.

**Table 3. Base case short-term annual healthcare costs from model comparing universal repeat screening of syphilis in late pregnancy with single screening**

| Screening strategy                | Total healthcare costs | Cost breakdown <sup>1</sup>  |                                                       |                                       |
|-----------------------------------|------------------------|------------------------------|-------------------------------------------------------|---------------------------------------|
|                                   |                        | Antenatal syphilis screening | Syphilis treatment (in pregnant women found positive) | Perinatal costs (for all pregnancies) |
| <b>Existing: single screen</b>    |                        |                              |                                                       |                                       |
| Estimate                          | £ 1,777,469,008        | £ 9,697,904                  | £ 535,434                                             | £ 1,767,235,670                       |
| Lower 95% CI                      | £ 1,769,393,140        | £ 9,661,636                  | £ 532,820                                             | £ 1,759,111,560                       |
| Upper 95% CI                      | £ 1,778,772,048        | £ 9,822,870                  | £ 545,591                                             | £ 1,768,490,710                       |
| <b>Alternative: repeat screen</b> |                        |                              |                                                       |                                       |
| Estimate                          | £ 1,787,355,870        | £ 18,860,259                 | £ 970,254                                             | £ 1,767,525,357                       |
| Lower 95% CI                      | £ 1,779,322,118        | £ 18,786,836                 | £ 964,636                                             | £ 1,759,402,583                       |
| Upper 95% CI                      | £ 1,788,703,813        | £ 19,100,346                 | £ 989,342                                             | £ 1,768,782,187                       |
| Cost difference                   | £ 9,886,863            | £ 9,162,355                  | £ 434,820                                             | £ 289,687                             |

<sup>1</sup> Costs to the NHS in the UK for all 725,891 pregnant women screened. Costs are spilt into 1) antenatal screening costs, which includes sample collection and laboratory testing; 2) syphilis treatment within sexual health clinics; and 3) perinatal costs, which includes the costs of delivery and neonatal care for all infants.

1  
2  
3  
4  
5  
6  
7  
8  
9  
10  
11  
12  
13  
14  
15  
16  
17  
18  
19  
20  
21  
22  
23  
24  
25  
26  
27  
28  
29  
30  
31  
32  
33  
34  
35  
36  
37  
38  
39  
40  
41  
42  
43  
44  
45  
46

**Table 4. Requirements to prevent one outcome – from model comparing universal repeat screening of syphilis in late pregnancy with single screening**

| <b>Outcome</b>            | <b>Cost</b>  | <b>Women screened in third trimester</b> | <b>Women treated for syphilis – TP and FP</b> | <b>Additional false positives</b> |
|---------------------------|--------------|------------------------------------------|-----------------------------------------------|-----------------------------------|
| Congenital syphilis       | £ 1,791,880  | 124,294                                  | 251                                           | 249                               |
| Intrauterine fetal demise | £ 37,852,707 | 2,625,664                                | 5,300                                         | 5,251                             |
| Neonatal death            | £ 79,507,578 | 5,515,066                                | 11,133                                        | 11,030                            |

FP, false positive; TP, true positive for syphilis infection.

For peer review only

1  
2  
3 The model calculated that 124,292 women would need to be rescreened in the third trimester to  
4 prevent one case of CS, 2.6 million to prevent one case of IUFD (i.e. one case prevented  
5 approximately every 3.6 years if every pregnant woman was rescreened), and 5.5 million to prevent  
6 one case of neonatal death (i.e. one case prevented approximately every 7.6 years if every pregnant  
7 woman was rescreened, **Table 4**). It would cost an additional £1,791,880 per case of CS prevented,  
8 £37,852,707 per case of IUFD prevented, and £79,507,578 per neonatal death prevented. An  
9 additional 251 women need to receive treatment for syphilis to prevent one case of CS (**Table 4**).

### 17 **Sensitivity and scenario analyses**

18  
19 The DSA results indicated that even accounting for parameter uncertainty, the total cost of the  
20 repeat screening strategy was always higher than the cost of the single screening strategy (see  
21 **Figure S2** in online supplement for Tornado diagram). Total costs were most sensitive to changes in  
22 the per screen cost, but also to changes in the specificity of the screening process, the proportion of  
23 women first attending antenatal care before their third trimester, syphilis incidence, and the cost of  
24 syphilis treatment (**Figure S2**). In the DSA examining the impact of clinical and cost parameters on  
25 the number of CS cases, the model was most sensitive to syphilis incidence during pregnancy and  
26 the probability of CS in infants born to women infected with syphilis during pregnancy who did not  
27 receive treatment (i.e. were undiagnosed; see **Figure S3**). In all iterations in the 1,000 PSA Monte  
28 Carlo simulations, the repeat screening strategy cost more than the single screening strategy and  
29 resulted in fewer cases of CS. The incremental cost and incremental cases of CS prevented are  
30 shown online in online **Figure S4**.

31  
32 When lifetime costs and utilities were considered (Scenario 1), the health and social care cost per  
33 additional QALY gained for the repeat screening strategy (ICER) was £120,494. In DSA, the ICER was  
34 £32,716 and £205,600, when discounting of utilities was 0% and 6% respectively (see **Table S15** in  
35 online supplement). Even if a lower discounting rate were considered by NICE in the future, it is  
36 unlikely that 0% discounting would be used.

37  
38 In further scenario analyses, reducing the uptake of repeat testing to 99.6% (in line with current  
39 uptake of the first screen, Scenario 2), including all women who attended antenatal care before their  
40 third trimester (i.e. no late first screen, Scenario 4), including 100% sensitivity and specificity of the  
41 screening process (Scenario 5), or including no false positives in the second screen (Scenario 6) had  
42 very little impact on the model outcomes, reducing the base case cost per CS case avoided by <10%  
43 (data not shown).

1  
2  
3 When the probability of becoming infected with syphilis between screens was increased seven-fold  
4 to 0.00012 (Scenario 3), repeat screening resulted in 39 fewer cases of CS compared to single  
5 screening, 0.9 fewer neonatal deaths, 13 fewer preterm deliveries, and 1.8 fewer cases of IUFDs  
6 whilst the repeat strategy cost an additional £9,638,476 (**Table S16** and **S17** in online supplement).  
7  
8 In this scenario, the cost per CS case prevented was £247,284 (**Table S18**). **Table S19** in the online  
9 supplement presents the cost per case of CS avoided and the ICER when the probability of becoming  
10 infected with syphilis between screens is higher than baseline (at 10 intervals between 0.00003 and  
11 0.00012). As anticipated, with each increase in incidence, the repeat screening strategy resulted in  
12 more CS cases prevented and a lower cost per CS case prevented. When lifetime healthcare and  
13 social-care costs were considered, the ICER was £11,171 (below the £20-£30k threshold used by  
14 NICE), when syphilis incidence in pregnancy was 0.004% and became cost saving at an incidence of  
15 0.005% (1 in 100,000) or higher.  
16  
17

18  
19 Scenario 7 examined the cost per screen needed to meet NICE ICER thresholds (at the current  
20 syphilis incidence) (see supplementary material **Table S20**). The per screen cost would need to  
21 decrease from £13.36 to £6.46 to take the ICER below £30k and £5.70 to take it below £20k when  
22 lifetime health and social care costs and utilities of CS were considered.  
23  
24  
25  
26  
27  
28  
29  
30  
31  
32

### 33 Discussion

34  
35 We report on the cost-effectiveness of repeat universal syphilis antenatal screening in the UK. Our  
36 results indicate that this screening strategy would not be cost-effective in the current UK setting  
37 where the prevalence and incidence of syphilis among pregnant women is low. Although the repeat  
38 screening strategy is likely to result in fewer cases of CS, the number of cases prevented would be  
39 small, 5-6 a year, and would cost an additional £9.9 million, equivalent to £1.8 million per case  
40 prevented. Most of the increase in cost is a result of the additional costs related to providing the  
41 second screen rather than treatment or delivery costs for women with syphilis.  
42  
43  
44  
45  
46  
47

48 The PSA and DSA indicated that the model results are robust to changes in the inputs. When lifetime  
49 health and social-care costs and health-related quality of life were considered (Scenario 1), the cost  
50 per QALY gained was £120,494 for the repeat screening strategy compared to the single screening  
51 strategy. This is well above the £20k-30k cost per QALY threshold that NICE uses to assess  
52 interventions [28], and also exceeds the £100,000 threshold used to assess drugs/interventions for  
53 rare conditions (the threshold used when the intervention results in <10 additional QALYs to an  
54 individual in their lifetime) [33]. For this analysis, costs and utilities were discounted by 3.5%, in line  
55  
56  
57  
58  
59  
60

1  
2  
3 with NICE guidelines for England [32]. When no discounting of utilities was assessed in DSA, the cost  
4 per QALY gained was £32,716, just above the £30k threshold.  
5  
6

7 Only two previous economic evaluations have assessed universal repeat syphilis screening in  
8 pregnancy compared to single screening in early pregnancy, both in the United States (US). Albright  
9 *et al.* reported that repeat third-trimester screening would prevent 60 CS cases per 4 million women  
10 costing \$419,842 per case avoided, concluding that repeat screening was not cost-effective [17].  
11 Hersh *et al.* found that repeat screening would prevent 41 CS cases per 3.9 million women and result  
12 in total cost savings of \$52 million [16]. Neither study accounted for late presentation to antenatal  
13 care - syphilis prevalence and incidence were considerably higher than in the UK as were healthcare  
14 costs.  
15  
16  
17  
18  
19  
20

21 It is important to note that changes to the screening strategy would not change the number of  
22 adverse pregnancy outcomes in women who decline screening, in women who present late to  
23 antenatal care and have one screen but no opportunity for a repeat screen, or in women who first  
24 present at the time of delivery, thereby missing the opportunity for any antenatal screening or  
25 treatment. For this reason, and because treatment for syphilis is not universally effective at  
26 preventing adverse pregnancy outcomes, it is likely that there would continue to be a very small  
27 number of infants born with CS each year irrespective of changes made to the screening strategy.  
28  
29  
30  
31  
32  
33  
34  
35

### 36 **Strengths and weaknesses**

37  
38 This is the first health economic analysis to assess the costs and clinical benefits of a repeat  
39 screening strategy for syphilis compared to a single screen strategy within the UK setting. The input  
40 values in the model were based on the best available evidence from the published literature, UK-  
41 specific surveillance data, NHS tariffs and published costs, and with input from experts in the field  
42 where data were lacking. These inputs were rigorously tested in sensitivity and scenario analyses to  
43 add confidence to the results, despite limited data in some areas.  
44  
45  
46  
47  
48

49 There were sparse UK data available on pregnancy outcomes in women treated for syphilis or in  
50 infants born with CS. There are no published EQ-5D scores for CS and a lack of evidence on changes  
51 to utility and health and social care costs over time for infants born with CS. We therefore used the  
52 additional lifetime cost of CP, estimated in a study from Denmark [27], as a proxy for the lifetime  
53 cost of CS. As such, the primary focus of the analysis was the short-term costs and CS cases avoided  
54 since it was difficult to have confidence in the estimate used for lifetime CS cost or utility.  
55  
56  
57  
58  
59  
60



1  
2  
3 The model assumed that women could not become infected with syphilis between the repeat screen  
4 and delivery. As the incidence estimate relates to the full duration of pregnancy, this assumption  
5 would overestimate the number of women diagnosed at the repeat screen and treated, therefore  
6 overestimating the benefits of the repeat screen strategy. However, the number of women who  
7 become infected with syphilis is small and thus this would likely have little impact on the overall  
8 results. Since we do not know what repeat screening coverage would be, the model assumed 100%  
9 coverage, since all women in the model had already agreed to a first screen. This is optimistic since it  
10 assumes continued engagement with antenatal services. However, scenario analysis 2 showed that  
11 even when uptake was <100% it would be unlikely to have much impact on the cost per CS case  
12 avoided.

13  
14 It was also assumed that all women and neonates diagnosed with syphilis receive the appropriate  
15 full course of treatment and all infants born to women diagnosed with syphilis in pregnancy receive  
16 syphilis testing at birth. However, the SASS study [13] found that in 2010-11, not all women  
17 diagnosed with syphilis received complete treatment and inadequate paediatric follow-up was  
18 identified as an issue. Lack of treatment in these women and neonates is likely to make the repeat  
19 screening even less cost-effective.

20  
21 Since there are no published estimates of the diagnostic accuracy (DA) of the syphilis screening  
22 process, accounting for the diagnostic accuracy of laboratory assays and the diagnosis decision  
23 making by clinicians, average sensitivity and specificity of EIA assays used in UK laboratories were  
24 used [23]. The DA values used here are considerably higher than those used in the US models  
25 [16,17], where a different testing algorithm is used [22] and would, if anything, bias repeat screening  
26 results towards being more cost-effective.

### 27 28 29 30 31 32 33 34 35 36 37 38 39 40 41 42 43 44 **Implications for clinicians and policymakers**

45  
46 The number of CS cases was most sensitivity to changes in the syphilis incidence between screens. It  
47 may be cost-effective to repeat screen for a period of time where there is a known syphilis outbreak  
48 or if there are multiple cases of CS in a short period within the same geographical area in women  
49 who tested negative for syphilis at the first screen - as this would indicate a much higher syphilis  
50 incidence in pregnancy in that area.

51  
52 Our model focused on the UK but is relevant to other European countries with similar syphilis  
53 prevalence and healthcare costs. Our analyses, using UK cost estimates, suggest that a universal  
54 second screen in late pregnancy could become cost-effective if the incidence of syphilis in pregnancy  
55  
56  
57  
58  
59  
60

1  
2  
3 were to increase (to 5 per 100,000 pregnant women), indicating that in countries that have far  
4 higher syphilis prevalence than the UK, a second screen could be cost saving. For example, recent  
5 estimates suggest that the prevalence of syphilis in the WHO African region is more than 10-fold  
6 higher than in the WHO European Region [34]. In such a high prevalence setting, combined with  
7 lower local healthcare costs, a second syphilis screen in late pregnancy could be cost-effective.  
8  
9

10  
11  
12 There could be some negative impact associated with repeat screening. A false positive result may  
13 lead to additional costs, unnecessary anxiety for mothers and their families, impact the mother's  
14 relationships, possibly even damage their confidence in the screening programme, as well as lead to  
15 overtreatment. It is vital to minimise unnecessary use of antibiotics where possible given growing  
16 concerns around antimicrobial resistance and because there is some evidence that antibiotic use in  
17 pregnancy increases the risk of childhood epilepsy, obesity, and asthma [35].  
18  
19

20  
21  
22  
23 Alternative approaches to reduce the number of CS cases and other adverse pregnancy outcomes  
24 could be more cost-effective and should be explored. These include better targeting of high-risk  
25 individuals and sexual health promotion in pregnancy. Furthermore, of the 20 CS cases in the UK  
26 since 2010, 11 had no record of the mother receiving antenatal screening. It remains unknown  
27 whether this was because testing was refused or due to very late/no first antenatal attendance [15].  
28 This highlights the need to ensure timely screening in pregnancy, particularly in women who present  
29 late who are already at increased risk of adverse pregnancy outcomes. Education for pregnant  
30 women around sexual health and STI prevention might be cost-effective and could be considered.  
31  
32  
33  
34  
35  
36  
37  
38  
39

#### 40 **Unanswered questions and future research**

41  
42 Our model had a single disease focus. At present however, pregnant women are screened for  
43 syphilis, HIV and hepatitis B. It would be useful to assess the potential cost-effectiveness of a repeat  
44 screen for all three infections since treatment for these infections during late pregnancy and/or at  
45 birth would reduce the risk of vertical transmission. Screening for all three infections may yield more  
46 benefits in terms of clinical outcomes and may make this strategy more cost-effective.  
47  
48  
49

50  
51 Furthermore, data collection including gestational week of first screen, coverage of repeat screen in  
52 high-risk women, pregnancy outcome for women treated for syphilis, stage of infection in women  
53 diagnosed with syphilis, and cost estimation for lifetime costs of being born with CS, would help  
54 inform future evaluations of screening strategies.  
55  
56  
57  
58  
59  
60

## Conclusions

The results of this health economic analysis indicate that implementing universal repeat screening for syphilis in pregnancy is unlikely to be cost-effective in the current UK setting where the prevalence and incidence of syphilis in pregnant women is low. Repeat screening could be considered in areas with a high syphilis incidence in pregnancy and may then be cost-effective, particularly if the cost per screen were low.

If syphilis prevalence continues to increase, the cost-effectiveness of the repeat screening strategy should be re-examined, highlighting the importance of continued monitoring of syphilis in pregnant women, screening uptake, CS cases and long-term follow-up.

Funding statement: This work was commissioned and funded by the UK National Screening Committee. Award/Grant number is not applicable.

Data Availability Statement: All data used for the model are included in either the main body of the text or in the supplementary online material.

Competing interests: SH, GW, and EA work at Aquarius Population Health and have received consultancy fees from the following companies on projects related to STIs: Abbott, Cepheid, Binx Health, Hologic and St. Georges University of London. IA, KT and MT were funded as consultants on the project through Aquarius Population Health. MT has received support from Cepheid for conference attendance. KT is in receipt of funding to University of Bristol from GlaxoSmithKline for work unrelated to this work. HB declares no competing interests.

Author contributions: The model structure was developed by SH, with input from GW, FS and JM. The final model structure was informed by input from JM, HB, MT, IA, KT and EA. SH developed the model parameters with input from MT, IA, GW, HB, FS, JM and KT. SH drafted the paper. All authors contributed to the interpretation of the results and contributed to the contents of the paper. All authors have approved the final submitted version.

1  
2  
3 Acknowledgments: We would also like to thank the following people for their contributions to this  
4 work: Nicola Bowers, Helen Fifer, Lyn Hutchison, Margaret Kingston, Anne Mackie, Paddy McMaster,  
5 Catherine Peckham, Ian Simms, Judith Timms and Sharon Webb.  
6  
7  
8  
9  
10  
11  
12  
13  
14

## 15 References

- 16 1 Public Health England. Sexually transmitted infections (STIs): Annual data tables. 2014-2018.  
17 Available at [https://www.gov.uk/government/statistics/sexually-transmitted-infections-stis-](https://www.gov.uk/government/statistics/sexually-transmitted-infections-stis-annual-data-tables)  
18 [annual-data-tables](https://www.gov.uk/government/statistics/sexually-transmitted-infections-stis-annual-data-tables). 2019.  
19
- 20 2 Ricci JM, Fojaco RM, O'Sullivan MJ. Congenital syphilis: the University of Miami/Jackson  
21 Memorial Medical Center experience, 1986-1988. *Obstet Gynecol* 1989;**74**:687-93.  
22
- 23 3 Sheffield JS, Sánchez PJ, Morris G, *et al*. Congenital syphilis after maternal treatment for syphilis  
24 during pregnancy. *Am J Obstet Gynecol* 2002;**186**:569-73. doi:10.1067/mob.2002.121541  
25
- 26 4 Gomez GB, Kamb ML, Newman LM, *et al*. Untreated maternal syphilis and adverse outcomes of  
27 pregnancy: a systematic review and meta-analysis. *Bull World Health Organ* 2013;**91**:217-26.  
28 doi:10.2471/BLT.12.107623  
29
- 30 5 De Santis M, De Luca C, Mappa I, *et al*. Syphilis Infection during Pregnancy: Fetal Risks and  
31 Clinical Management. *Infect Dis Obstet Gynecol* 2012;**2012**. doi:10.1155/2012/430585  
32
- 33 6 Mwaniki MK, Atieno M, Lawn JE, *et al*. Long-term neurodevelopmental outcomes after  
34 intrauterine and neonatal insults: a systematic review. *Lancet* 2012;**379**:445-52.  
35 doi:10.1016/S0140-6736(11)61577-8  
36
- 37 7 Arnold SR, Ford-Jones EL. Congenital syphilis: A guide to diagnosis and management. *Paediatr*  
38 *Child Health* 2000;**5**:463-9.  
39
- 40 8 NHS Digital. NHS Maternity Statistics, England 2017-18. 2018. [https://digital.nhs.uk/data-and-](https://digital.nhs.uk/data-and-information/publications/statistical/nhs-maternity-statistics/2017-18)  
41 [information/publications/statistical/nhs-maternity-statistics/2017-18](https://digital.nhs.uk/data-and-information/publications/statistical/nhs-maternity-statistics/2017-18) (accessed 19 Jun 2019).  
42
- 43 9 PHE and NHS. NHS Infectious Diseases in Pregnancy Screening Programme Screening Standards  
44 Data Report 1 April 2016 to 31 March 2017. 2019.  
45 [https://www.gov.uk/government/publications/infectious-diseases-in-pregnancy-screening-](https://www.gov.uk/government/publications/infectious-diseases-in-pregnancy-screening-standards-data-report)  
46 [standards-data-report](https://www.gov.uk/government/publications/infectious-diseases-in-pregnancy-screening-standards-data-report) (accessed 21 May 2019).  
47
- 48 10 Public Health Agency, Belfast. Sexually Transmitted Infection surveillance in Northern Ireland.  
49 An analysis of data for the calendar year 2016. 2017.  
50 [https://www.gov.uk/government/statistics/sexually-transmitted-infections-stis-annual-data-](https://www.gov.uk/government/statistics/sexually-transmitted-infections-stis-annual-data-tables)  
51 [tables](https://www.gov.uk/government/statistics/sexually-transmitted-infections-stis-annual-data-tables)  
52
- 53 11 Public Health England. NHS Infectious Diseases in Pregnancy Screening Programme Handbook  
54 2016 to 2017. 2016. [https://www.gov.uk/government/publications/infectious-diseases-in-](https://www.gov.uk/government/publications/infectious-diseases-in-pregnancy-screening-programme-handbook)  
55 [pregnancy-screening-programme-handbook](https://www.gov.uk/government/publications/infectious-diseases-in-pregnancy-screening-programme-handbook)  
56  
57  
58  
59  
60

- 12 Public Health England. Screening tests for you and your baby. Important information about the screening choices you will have during and after your pregnancy. NHS booklet February 2020. Available at [https://assets.publishing.service.gov.uk/government/uploads/system/uploads/attachment\\_data/file/865122/Screening\\_tests\\_for\\_you\\_and\\_your\\_baby\\_information\\_leaflet.pdf](https://assets.publishing.service.gov.uk/government/uploads/system/uploads/attachment_data/file/865122/Screening_tests_for_you_and_your_baby_information_leaflet.pdf).
- 13 Townsend CL, Francis K, Peckham CS, *et al*. Syphilis screening in pregnancy in the United Kingdom, 2010–2011: a national surveillance study. *BJOG* 2017;**124**:79–86. doi:10.1111/1471-0528.14053
- 14 World Health Organization. Global guidance on criteria and processes for validation: elimination of mother-to-child transmission (EMTCT) of HIV and syphilis. Geneva: World Health Organization, 2013. Available at <https://www.who.int/reproductivehealth/publications/emtct-hiv-syphilis/en/>.
- 15 Furegato M, Fifer H, Mohammed H, *et al*. Factors associated with four atypical cases of congenital syphilis in England, 2016 to 2017: an ecological analysis. *Euro Surveill* 2017;**22**. doi:10.2807/1560-7917.ES.2017.22.49.17-00750
- 16 Hersh AR, Megli CJ, Caughey AB. Repeat Screening for Syphilis in the Third Trimester of Pregnancy: A Cost-Effectiveness Analysis. *Obstet Gynecol* 2018;**132**:699–707. doi:10.1097/AOG.0000000000002795
- 17 Albright CM, Emerson JB, Werner EF, *et al*. Third-Trimester Prenatal Syphilis Screening: A Cost-Effectiveness Analysis. *Obstetrics & Gynecology* 2015;**126**:479–85. doi:10.1097/AOG.0000000000000997
- 18 Qin J, Yang T, Xiao S, *et al*. Reported Estimates of Adverse Pregnancy Outcomes among Women with and without Syphilis: A Systematic Review and Meta-Analysis. *PLoS ONE* 2014;**9**:e102203. doi:10.1371/journal.pone.0102203
- 19 XE. Currency Converter. <https://www.xe.com/>
- 20 Curtis, L. & Burns, A. (2018) Unit Costs of Health and Social Care 2018, Personal Social Services Research Unit, University of Kent, Canterbury. <https://www.pssru.ac.uk/project-pages/unit-costs/unit-costs-2018/>
- 21 Shiber L, Todia WJ. Cost and clinical utility of repeated syphilis screening in the third trimester in a high-risk population. *American Journal of Obstetrics and Gynecology* 2014;**210**:267.e1-267.e5. doi:10.1016/j.ajog.2013.12.012
- 22 Morshed MG, Singh AE. Recent Trends in the Serologic Diagnosis of Syphilis. *Clinical and Vaccine Immunology* 2015;**22**:137–47. doi:10.1128/CVI.00681-14
- 23 Data on EIA assays used in UK supplied by lead microbiologist for bacterial STIs at the National Infection Service, Public Health England. 2019.
- 24 Pathway Analytics. Integrated Sexual Health Tariff - London ISHT 2017/2018. <https://www.pathwayanalytics.com/>.
- 25 Campbell H, Kurinczuk J, Heazell A, *et al*. Healthcare and wider societal implications of stillbirth: a population-based cost-of-illness study. *BJOG: Int J Obstet Gy* 2018;**125**:108–17. doi:10.1111/1471-0528.14972

- 1  
2  
3 26 Khan KA, Petrou S, Dritsaki M, *et al*. Economic costs associated with moderate and late preterm  
4 birth: a prospective population-based study. *BJOG: An International Journal of Obstetrics &*  
5 *Gynaecology* 2015;**122**:1495–505. doi:10.1111/1471-0528.13515  
6  
7  
8 27 Kruse M, Michelsen SI, Flachs EM, *et al*. Lifetime costs of cerebral palsy. *Developmental*  
9 *Medicine & Child Neurology* 2009;**51**:622–8. doi:10.1111/j.1469-8749.2008.03190.x  
10  
11 28 National Institute for Clinical Excellence. Guide to the methods of technology appraisal 2013.  
12 2013. [https://www.nice.org.uk/process/pmg9/resources/guide-to-the-methods-of-technology-](https://www.nice.org.uk/process/pmg9/resources/guide-to-the-methods-of-technology-appraisal-2013-pdf-2007975843781)  
13 [appraisal-2013-pdf-2007975843781](https://www.nice.org.uk/process/pmg9/resources/guide-to-the-methods-of-technology-appraisal-2013-pdf-2007975843781)  
14  
15 29 Carroll AE, Downs SM. Comprehensive Cost-Utility Analysis of Newborn Screening Strategies.  
16 *Pediatrics* 2006;**117**:S287–95. doi:10.1542/peds.2005-2633H  
17  
18 30 Probst LE, Wilkinson J, Nichols BD. Diagnosis of congenital syphilis in adults presenting with  
19 interstitial keratitis. *Can J Ophthalmol* 1994;**29**:77–80.  
20  
21 31 UK - Office for National Statistics. National life tables, UK: 2016 - 2018. 2019.  
22 [https://www.ons.gov.uk/peoplepopulationandcommunity/birthsdeathsandmarriages/lifeexpect-](https://www.ons.gov.uk/peoplepopulationandcommunity/birthsdeathsandmarriages/lifeexpectancies/bulletins/nationallifetablesunitedkingdom/2016to2018)  
23 [ancies/bulletins/nationallifetablesunitedkingdom/2016to2018](https://www.ons.gov.uk/peoplepopulationandcommunity/birthsdeathsandmarriages/lifeexpectancies/bulletins/nationallifetablesunitedkingdom/2016to2018) (accessed 1 Oct 2019).  
24  
25 32 National Institute for Health and Care Excellence. How should NICE assess future costs and  
26 health benefits. NICE Citizens Council Meeting. November 2011. 2020.  
27 [https://www.nice.org.uk/Media/Default/Get-involved/Citizens-](https://www.nice.org.uk/Media/Default/Get-involved/Citizens-Council/Reports/CCReport15Discounting.pdf)  
28 [Council/Reports/CCReport15Discounting.pdf](https://www.nice.org.uk/Media/Default/Get-involved/Citizens-Council/Reports/CCReport15Discounting.pdf)  
29  
30 33 Tom Powell, Michael O'Donnell. House of Commons Debate Pack. NICE appraisals of rare  
31 diseases. 2019. [http://researchbriefings.files.parliament.uk/documents/CDP-2019-0022/CDP-](http://researchbriefings.files.parliament.uk/documents/CDP-2019-0022/CDP-2019-0022.pdf)  
32 [2019-0022.pdf](http://researchbriefings.files.parliament.uk/documents/CDP-2019-0022/CDP-2019-0022.pdf)  
33  
34 34 Rowley J, Vander Hoorn S, Korenromp E, *et al*. Chlamydia, gonorrhoea, trichomoniasis and  
35 syphilis: global prevalence and incidence estimates, 2016. *Bull World Health Organ* 2019;**97**:548-  
36 562P. doi:10.2471/BLT.18.228486  
37  
38 35 Kuperman AA, Koren O. Antibiotic use during pregnancy: how bad is it? *BMC Med* 2016;**14**.  
39 doi:10.1186/s12916-016-0636-0  
40  
41  
42  
43  
44  
45  
46  
47  
48  
49  
50  
51  
52  
53  
54  
55  
56  
57  
58  
59  
60

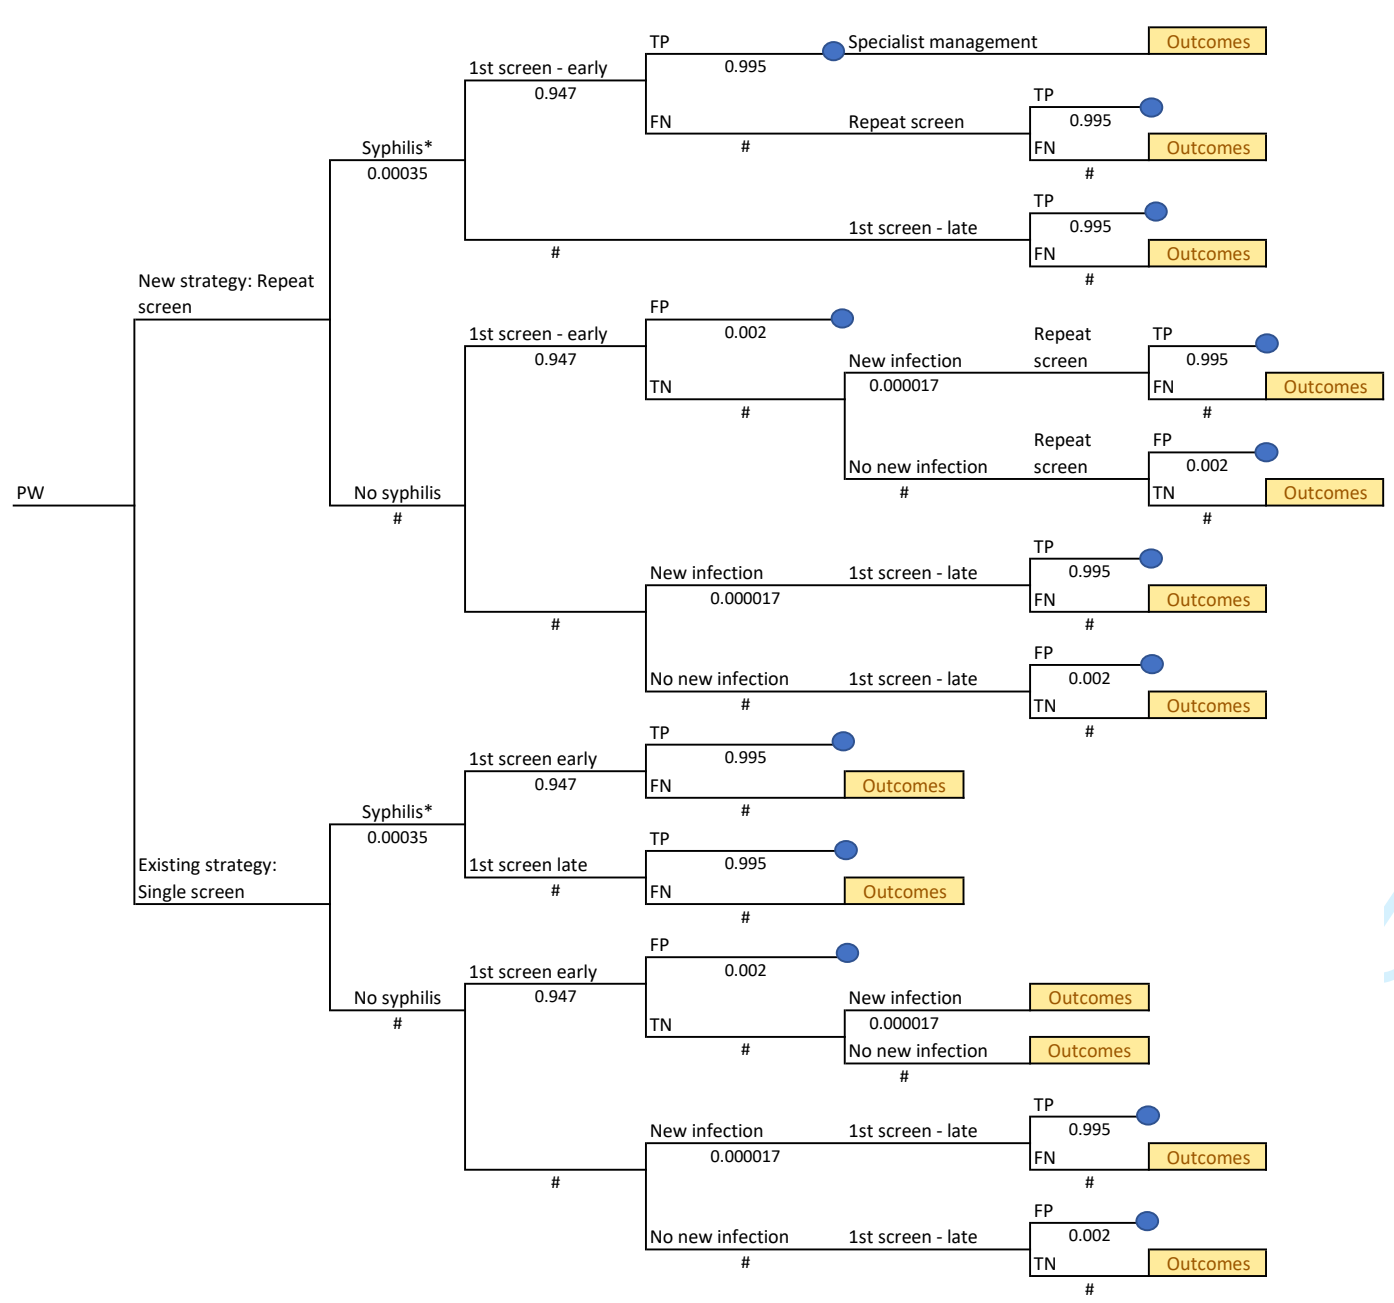

## Online Supplement

### Contents

|            |                                                                                                                                                        |    |
|------------|--------------------------------------------------------------------------------------------------------------------------------------------------------|----|
| Figure S1. | Pregnancy outcomes used in the decision tree comparing universal repeat screening of syphilis in late pregnancy with single screening .....            | 3  |
| Figure S2. | Tornado diagram – one-way deterministic sensitivity analysis of total costs - parameters with least impact removed .....                               | 4  |
| Figure S3. | Tornado diagram - one-way deterministic sensitivity analysis of CS cases - parameters with least impact removed .....                                  | 5  |
| Figure S4. | Incremental cost versus additional cases of CS prevented .....                                                                                         | 6  |
| Table S1.  | Assumptions applied to screening strategies and rationale .....                                                                                        | 7  |
| Table S2.  | Pregnancy outcomes - parameter inputs for decision tree comparing universal repeat screening of syphilis in late pregnancy with single screening ..... | 8  |
| Table S3.  | Pregnancy outcome data taken from published large meta-analysis of international studies [2] .....                                                     | 10 |
| Table S4.  | Comparing the risk of adverse pregnancy outcomes in meta-analysis with risk observed in the UK in order to scale meta-analysis data .....              | 12 |
| Table S5.  | Pregnancy outcome data used in the model – adjusted from published large meta-analysis of international studies [2] to reflect UK risks.....           | 13 |
| Table S6.  | Overall number of women screened for syphilis in pregnancy, 2017/18 .....                                                                              | 14 |
| Table S7.  | Gestational week at first antenatal care attendance – by UK country .....                                                                              | 15 |
| Table S8.  | Calculating the cost per antenatal syphilis screen .....                                                                                               | 16 |
| Table S9.  | Calculating the cost of treatment and management of women diagnosed with syphilis in pregnancy .....                                                   | 18 |
| Table S10. | Gestational week at delivery (used for calculating delivery costs and estimating pregnancy outcomes) .....                                             | 19 |
| Table S11. | Calculating the average healthcare costs associated with a neonatal death.....                                                                         | 20 |
| Table S12. | Calculating the cost of testing for syphilis in neonates with clinical signs of congenital syphilis (CS) .....                                         | 21 |
| Table S13. | Calculating the cost of treating neonates with congenital syphilis (CS).....                                                                           | 23 |



|    |            |                                                                              |
|----|------------|------------------------------------------------------------------------------|
| 1  |            |                                                                              |
| 2  |            |                                                                              |
| 3  | Table S14. | Calculating the cost of neonate screening in infants born to mothers treated |
| 4  |            | for syphilis in pregnancy ..... 24                                           |
| 5  |            |                                                                              |
| 6  |            |                                                                              |
| 7  | Table S15. | Long-term health care and social care costs associated with congenital       |
| 8  |            | syphilis (CS) – results of the model comparing universal repeat screening    |
| 9  |            | of syphilis in late pregnancy with single screening ..... 25                 |
| 10 |            |                                                                              |
| 11 |            |                                                                              |
| 12 | Table S16. | Clinical outcomes for Scenario 3 (0.00012 probability of syphilis infection  |
| 13 |            | in pregnancy) ..... 26                                                       |
| 14 |            |                                                                              |
| 15 |            |                                                                              |
| 16 | Table S17. | Cost outcomes for Scenario 3 (0.00012 probability of syphilis infection      |
| 17 |            | in pregnancy) ..... 26                                                       |
| 18 |            |                                                                              |
| 19 |            |                                                                              |
| 20 | Table S18. | Requirements to prevent one outcome for Scenario 3 (0.00012 probability      |
| 21 |            | of syphilis infection in pregnancy) ..... 26                                 |
| 22 |            |                                                                              |
| 23 |            |                                                                              |
| 24 | Table S19. | Short and long-term cost outcomes for Scenario 3 (higher syphilis incidence  |
| 25 |            | in pregnancy) ..... 27                                                       |
| 26 |            |                                                                              |
| 27 |            |                                                                              |
| 28 | Table S20. | Cost per screen needed to meet NICE ICER thresholds (Scenario 7) ..... 29    |
| 29 |            |                                                                              |
| 30 | References | ..... 30                                                                     |
| 31 |            |                                                                              |
| 32 |            |                                                                              |
| 33 |            |                                                                              |
| 34 |            |                                                                              |
| 35 |            |                                                                              |
| 36 |            |                                                                              |
| 37 |            |                                                                              |
| 38 |            |                                                                              |
| 39 |            |                                                                              |
| 40 |            |                                                                              |
| 41 |            |                                                                              |
| 42 |            |                                                                              |
| 43 |            |                                                                              |
| 44 |            |                                                                              |
| 45 |            |                                                                              |
| 46 |            |                                                                              |
| 47 |            |                                                                              |
| 48 |            |                                                                              |
| 49 |            |                                                                              |
| 50 |            |                                                                              |
| 51 |            |                                                                              |
| 52 |            |                                                                              |
| 53 |            |                                                                              |
| 54 |            |                                                                              |
| 55 |            |                                                                              |
| 56 |            |                                                                              |
| 57 |            |                                                                              |
| 58 |            |                                                                              |
| 59 |            |                                                                              |
| 60 |            |                                                                              |

1  
2  
3 **Figure S1. Pregnancy outcomes used in the decision tree comparing universal repeat screening of**  
4 **syphilis in late pregnancy with single screening**  
5  
6  
7

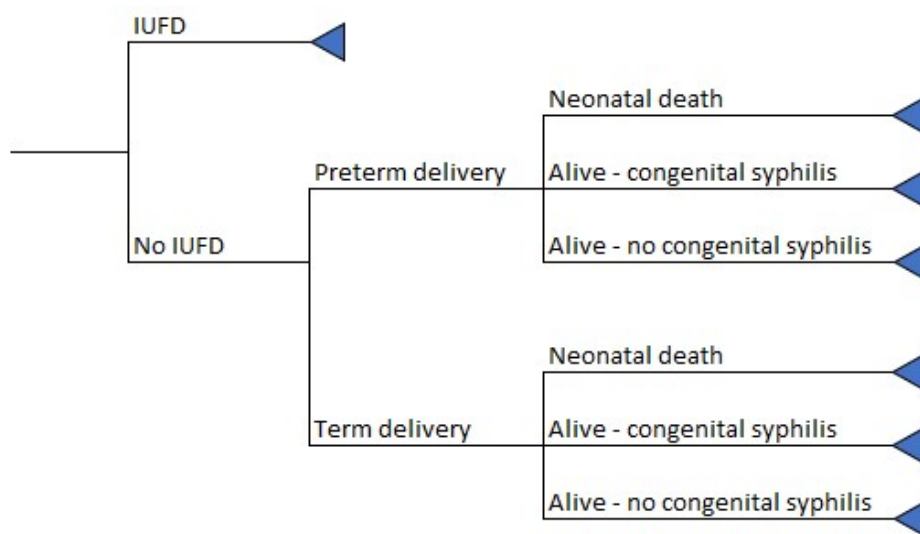

28 Footnote:

29 IUFD, intrauterine fetal demise; preterm refers to <37 weeks gestation. The blue triangle indicates  
30 the branch end point.  
31

32 This diagram complements **Figure 1** in the main body of the paper. The probability of each of these  
33 outcomes occurring for each branch of the tree is presented in **Table S2**.  
34  
35  
36  
37  
38  
39  
40  
41  
42  
43  
44  
45  
46  
47  
48  
49  
50  
51  
52  
53  
54  
55  
56  
57  
58  
59  
60

Figure S2. Tornado diagram – one-way deterministic sensitivity analysis of total costs - parameters with least impact removed

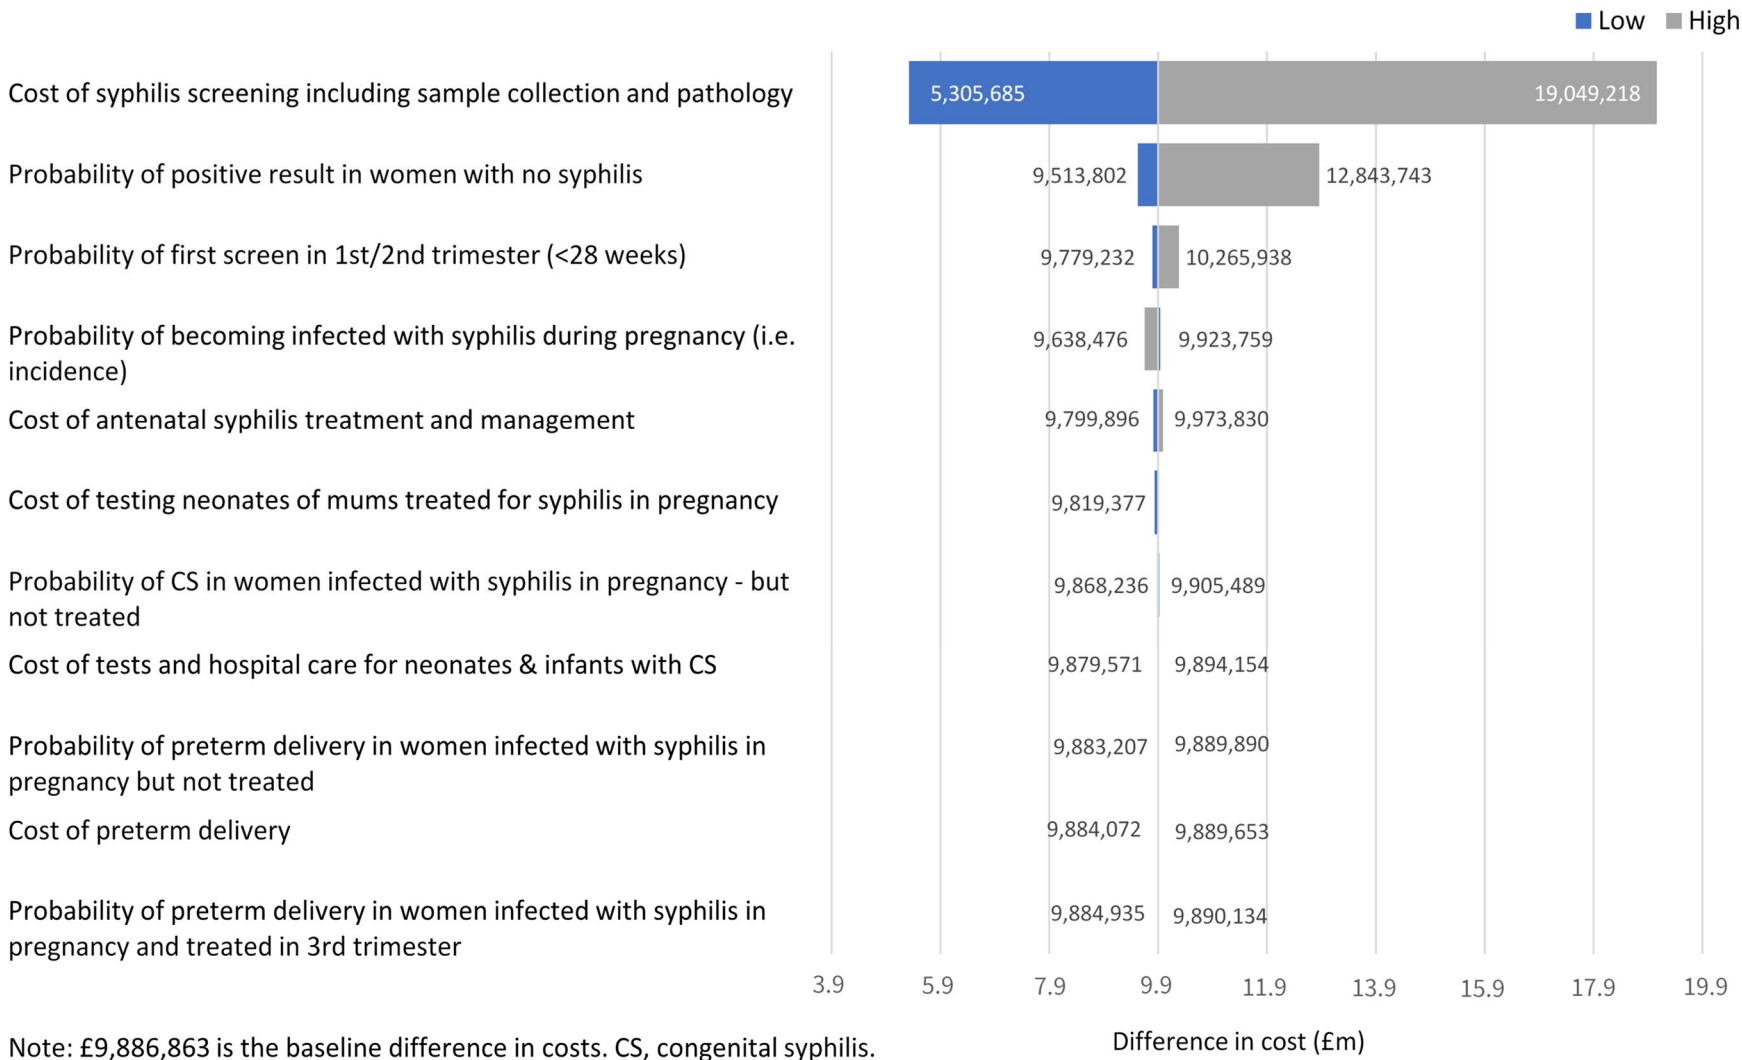

Figure S3. Tornado diagram - one-way deterministic sensitivity analysis of CS cases - parameters with least impact removed

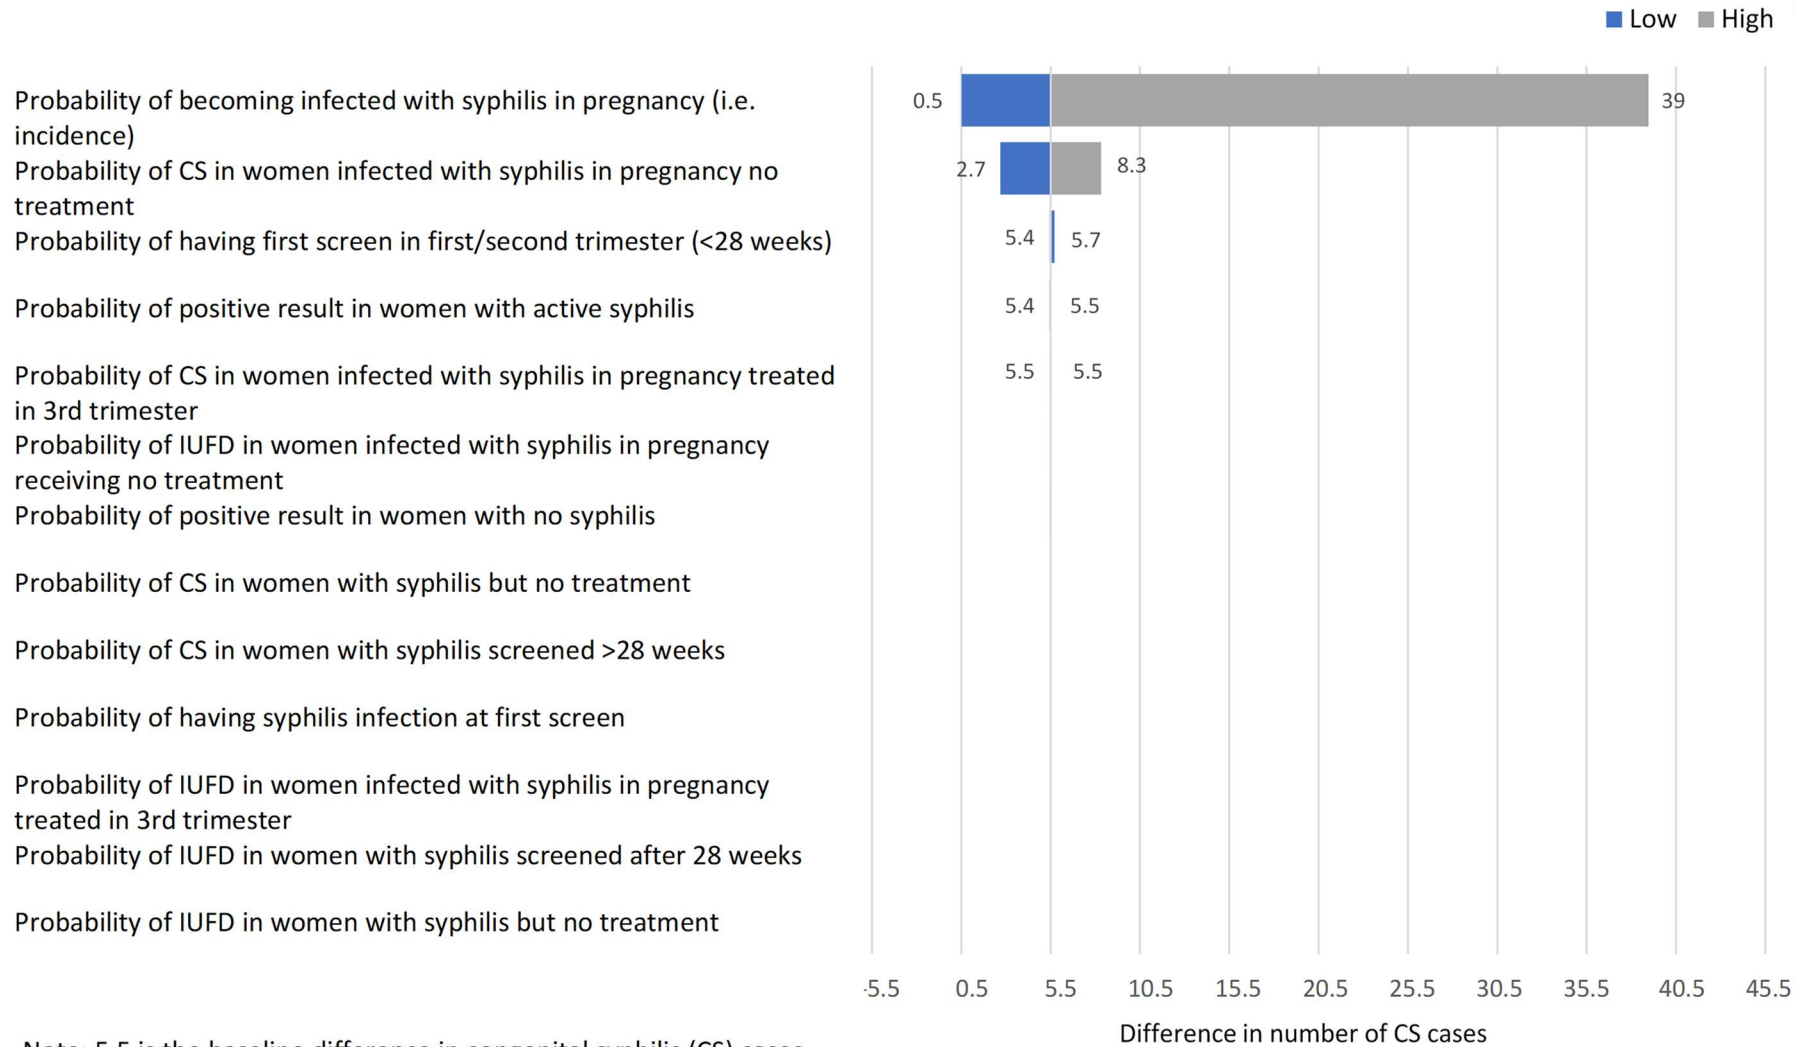

1  
2  
3 **Figure S4. Incremental cost versus additional cases of CS prevented**  
4  
5  
6  
7

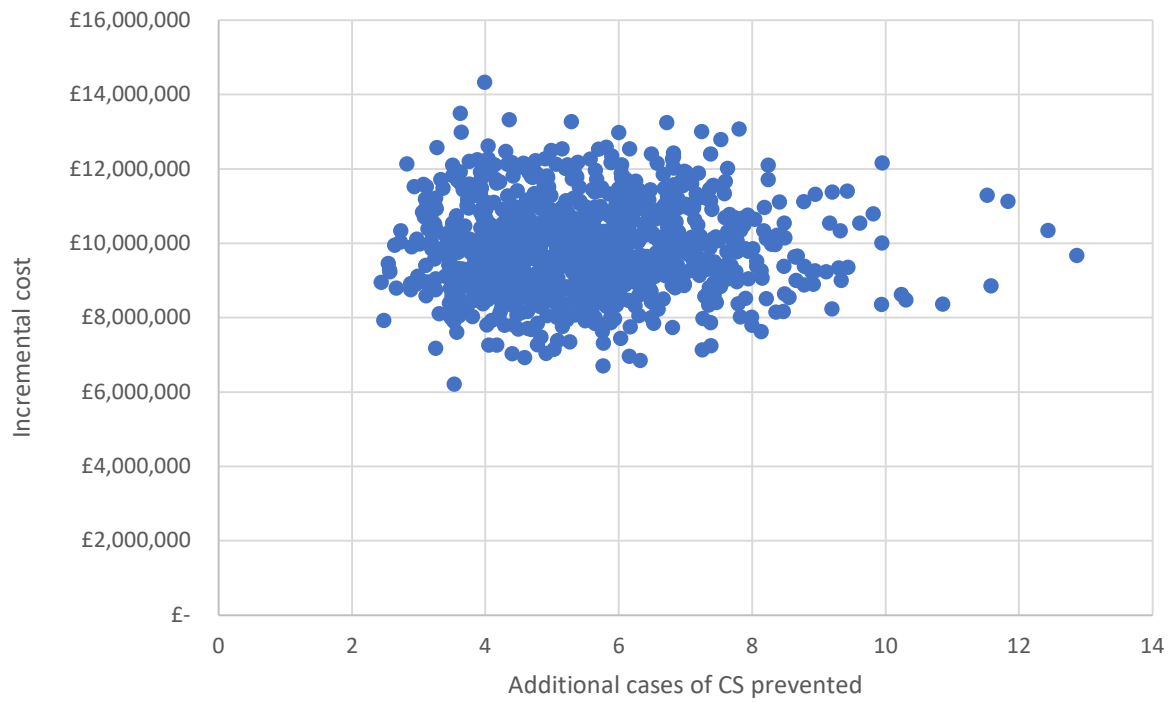

30  
31  
32 This figure is an output from the Probabilistic Sensitivity Analysis (PSA) and shows the impact of  
33 parameter uncertainty on the cost per additional case of CS prevented in universal repeat screening  
34 of syphilis in late pregnancy versus single screening.  
35  
36  
37  
38  
39  
40  
41  
42  
43  
44  
45  
46  
47  
48  
49  
50  
51  
52  
53  
54  
55  
56  
57  
58  
59  
60

**Table S1. Assumptions applied to screening strategies and rationale**

| Assumption                                                                                                                                                                                                                   | Note                                                                                                                                                                                                                                    |
|------------------------------------------------------------------------------------------------------------------------------------------------------------------------------------------------------------------------------|-----------------------------------------------------------------------------------------------------------------------------------------------------------------------------------------------------------------------------------------|
| All women found positive for syphilis, at their first or repeat screen, are referred to care within a sexual health clinic and are successfully treated within that setting.                                                 | As per clinical guidelines [1]. Uptake of treatment in diagnosed women is thought to be high. No published data were found to support or refute this assumption.                                                                        |
| The clinical management of women who are diagnosed with syphilis at their first screen includes repeat testing of syphilis and as such they do not receive a repeat screen as part of the IDPS in either screening strategy. | Recommendation from experts. This is hypothetical, as repeat screening is not current practice.                                                                                                                                         |
| Infants born with CS display signs of CS, 40% at birth and 60% some weeks/months after delivery and are tested and treated accordingly.                                                                                      | Based on expert opinion and evidence indicating that most infants with CS develop signs by 5 weeks. Lack of data on the proportion of CS cases with late presentation (after two years) [1].                                            |
| There is no loss to follow-up, i.e. all women who are identified as needing treatment receive it.                                                                                                                            | Inclusion of loss to follow-up in the model would add unnecessary complexity to the model. Also, there is lack of data on loss to follow-up in this setting.                                                                            |
| There is 100% uptake of repeat screening in women who were initially screened.                                                                                                                                               | Assessed in Scenario Analysis 2.                                                                                                                                                                                                        |
| The model inputs are not correlated.                                                                                                                                                                                         | To avoid over complexity in the model and due to lack of evidence around correlation.                                                                                                                                                   |
| Pregnant women who attend first antenatal care late receive their first screen at that point and therefore miss the opportunity for a repeat test.                                                                           | Recommendation from experts. This is hypothetical, as repeat screening is not current practice.                                                                                                                                         |
| Preterm vs. term delivery impacts costs but the model assumes it has no impact on the risk of pregnancy outcomes (neonatal death or congenital syphilis).                                                                    | Lack of data around correlation between timing of delivery and pregnancy outcome.                                                                                                                                                       |
| The repeat screen would be performed at 28 weeks gestation to coincide with existing routine anaemia blood tests. It was assumed that no new syphilis infection could occur between this screen and delivery.                | No data could be found on the incidence of syphilis or the impact of a new syphilis infection that late in pregnancy. Timing of repeat screen based on expert advice – and is hypothetical as repeat screening is not current practice. |
| No women undergo a repeat screen in the current care pathway (i.e. the single screening strategy).                                                                                                                           | Following expert advice that few high-risk women receive repeat screening at present. Lack of data around uptake of repeat screening and pregnancy outcomes for low risk vs. high risk women.                                           |

**Table S2. Pregnancy outcomes - parameter inputs for decision tree comparing universal repeat screening of syphilis in late pregnancy with single screening**

| Parameter                                                                                                 | Baseline value     | Low   | High  | Note                                                                                                          |
|-----------------------------------------------------------------------------------------------------------|--------------------|-------|-------|---------------------------------------------------------------------------------------------------------------|
| Pregnant women with no syphilis                                                                           |                    |       |       |                                                                                                               |
| IUFD                                                                                                      | 0.004              | 0.003 | 0.005 | Tables S3-S5                                                                                                  |
| Preterm delivery                                                                                          | 0.075              | 0.058 | 0.097 | Tables S3-S5                                                                                                  |
| Neonatal death                                                                                            | 0.002              | 0.001 | 0.003 | Tables S3-S5                                                                                                  |
| Congenital syphilis                                                                                       | 0.000              | -     | -     | Assumption                                                                                                    |
| Pregnant women with syphilis diagnosed and treated <28 weeks                                              |                    |       |       |                                                                                                               |
| IUFD                                                                                                      | 0.005              | 0.002 | 0.012 | Tables S3-S5                                                                                                  |
| Preterm delivery                                                                                          | 0.079              | 0.042 | 0.143 | Tables S3-S5                                                                                                  |
| Neonatal death                                                                                            | 0.003              | 0.001 | 0.014 | Tables S3-S5                                                                                                  |
| Congenital syphilis                                                                                       | 0.011              | 0.008 | 0.016 | Tables S3-S5                                                                                                  |
| Pregnant women with syphilis diagnosed and treated ≥28 weeks                                              |                    |       |       |                                                                                                               |
| IUFD                                                                                                      | 0.023              | 0.018 | 0.028 | Tables S3-S5                                                                                                  |
| Preterm delivery                                                                                          | 0.183              | 0.119 | 0.275 | Tables S3-S5                                                                                                  |
| Neonatal death                                                                                            | 0.013              | 0.005 | 0.032 | Tables S3-S5                                                                                                  |
| Congenital syphilis                                                                                       | 0.038 <sup>1</sup> | 0.029 | 0.047 | Tables S3-S5                                                                                                  |
| Pregnant women with syphilis not diagnosed or treated                                                     |                    |       |       |                                                                                                               |
| IUFD                                                                                                      | 0.028              | 0.023 | 0.033 | Tables S3-S5                                                                                                  |
| Preterm delivery                                                                                          | 0.241              | 0.188 | 0.305 | Tables S3-S5                                                                                                  |
| Neonatal death                                                                                            | 0.014              | 0.009 | 0.022 | Tables S3-S5                                                                                                  |
| Congenital syphilis                                                                                       | 0.034 <sup>1</sup> | 0.026 | 0.042 | Tables S3-S5                                                                                                  |
| Pregnant women infected with syphilis in pregnancy and diagnosed and treated in 3 <sup>rd</sup> trimester |                    |       |       |                                                                                                               |
| IUFD                                                                                                      | 0.006              | 0.002 | 0.013 | Assumed to have same risk as women diagnosed and treated for syphilis infection in 1 <sup>st</sup> trimester. |
| Preterm delivery                                                                                          | 0.071              | 0.038 | 0.127 |                                                                                                               |
| Neonatal death                                                                                            | 0.003              | 0.001 | 0.015 |                                                                                                               |
| Congenital syphilis                                                                                       | 0.010              | 0.007 | 0.014 |                                                                                                               |
| Pregnant women infected with syphilis during pregnancy not diagnosed or treated                           |                    |       |       |                                                                                                               |
| IUFD                                                                                                      | 0.028              | 0.023 | 0.033 | Assumed to have same risk as women with syphilis not diagnosed or treated. Estimate based on expert opinion.  |
| Preterm delivery                                                                                          | 0.241              | 0.188 | 0.305 |                                                                                                               |
| Neonatal death                                                                                            | 0.014              | 0.009 | 0.022 |                                                                                                               |
| Congenital syphilis                                                                                       | 0.500              | 0.250 | 0.750 |                                                                                                               |

IUFD, intrauterine foetal demise. Low and high values are based on the 95% confidence intervals (CIs) from the meta-analysis Qin *et al.* [2] adjusted to the UK setting in the same way as the baseline values (See **Tables S3-S5**).

<sup>1</sup>The probability of congenital syphilis in women with syphilis is higher in women treated at ≥28 weeks gestation than in women receiving no treatment. This is because estimates are from a meta-

1  
2  
3 analysis which combined data from 15 and 33 studies respectively to estimate risk and both  
4  
5 estimates have wide, overlapping confidence intervals.  
6  
7  
8  
9  
10  
11  
12  
13  
14  
15  
16  
17  
18  
19  
20  
21  
22  
23  
24  
25  
26  
27  
28  
29  
30  
31  
32  
33  
34  
35  
36  
37  
38  
39  
40  
41  
42  
43  
44  
45  
46  
47  
48  
49  
50  
51  
52  
53  
54  
55  
56  
57  
58  
59  
60

For peer review only



Table S3. Pregnancy outcome data taken from published large meta-analysis of international studies [2]

| Pregnancy outcome   | Women with no syphilis | Syphilis infection at time of conception                |                                                         |                                                           |                                                         | New syphilis infection during pregnancy |                                                          |                   |
|---------------------|------------------------|---------------------------------------------------------|---------------------------------------------------------|-----------------------------------------------------------|---------------------------------------------------------|-----------------------------------------|----------------------------------------------------------|-------------------|
|                     |                        | a<br>First screen + treatment 1 <sup>st</sup> trimester | b<br>First screen + treatment 2 <sup>nd</sup> trimester | c<br>First screen + treatment 1/2 <sup>nd</sup> trimester | d<br>First screen + treatment 3 <sup>rd</sup> trimester | e<br>No treatment                       | f<br>Repeat screen + treatment 3 <sup>rd</sup> trimester | g<br>No treatment |
| Congenital syphilis | 0.0%                   | 10.4%                                                   | 17.6%                                                   | 12.1%                                                     | 40.6%                                                   | 36.0%                                   | 10.4%                                                    | 50%               |
| Preterm delivery    | 7.2%                   | 6.8%                                                    | 10.1%                                                   | 7.6%                                                      | 17.6%                                                   | 23.2%                                   | 6.8%                                                     | 23.2%             |
| IUFD (stillbirth)   | 3.7%                   | 5.3%                                                    | 4.2%                                                    | 5.0%                                                      | 21.3%                                                   | 26.4%                                   | 5.3%                                                     | 26.4%             |
| Neonatal death      | 2.0%                   | 3.8%                                                    | 3.0%                                                    | 3.6%                                                      | 15.1%                                                   | 16.2%                                   | 3.8%                                                     | 16.2%             |

These data are from a systematic review and meta-analysis which measured pregnancy outcomes in women with and without syphilis (Qin *et al.* [2]). Each estimate is an average calculated by combining data from 2-33 different studies.

The risk of neonatal death was reported for the whole of pregnancy but was not calculated separately for treatment in each pregnancy trimester. For the model, the risk of intrauterine fetal demise (IUFD) in each trimester compared to the overall risk in pregnancy was used to estimate the risk of neonatal death in each trimester compared to the overall risk in pregnancy.

Column c, the risk of pregnancy outcomes if syphilis is diagnosed and treated in the 1<sup>st</sup> or 2<sup>nd</sup> trimester, was calculated using data from the 1<sup>st</sup> and 2<sup>nd</sup> trimesters (column a and b) and using UK data to calculate the proportion of women first attending antenatal care in their 1<sup>st</sup> or 2<sup>nd</sup> trimester (75.9% and 24.1% respectively). For example, the risk of congenital syphilis (CS) was calculated as follows:  $(0.759 \times 0.104) + (0.241 \times 0.176) = 0.121$ .

1  
2  
3 Column e: no treatment group due to a false negative test result. The probability of CS in women with syphilis is higher in women treated in 3<sup>rd</sup> trimester  
4 (column d) than in women receiving no treatment (column e). This is because estimates are from a meta-analysis which combined data from 15 and 33  
5 studies respectively to estimate risk and both estimates have wide, overlapping confidence intervals.  
6  
7

8 Column f: women infected with syphilis during pregnancy but diagnosed and treated at their repeat screen (in third trimester) are assumed to have the  
9 same risk of adverse pregnancy outcomes as women who are diagnosed and treated in their first pregnancy trimester (column a) (from expert opinion).  
10  
11

12 Column g: the risk of preterm delivery, IUFD and neonatal death is assumed to be the same as for women who have syphilis at conception but who are not  
13 treated in pregnancy (column e). However, the risk of CS is estimated as 50%, since the risk is known to be high in primary infection (from expert opinion).  
14  
15

16 The risk of adverse pregnancy outcomes in women with no syphilis in the meta-analysis data (Qin *et al*) [2] were considerably higher than the numbers seen  
17 in pregnant women in the UK. The risk of CS in women with syphilis was also considerably higher in the meta-analysis results than seen in the UK [3,4].  
18  
19

20 Therefore, these inputs were adjusted to the UK settings (See **Table S4**).  
21  
22  
23  
24  
25  
26  
27  
28  
29  
30  
31  
32  
33  
34  
35  
36  
37  
38  
39  
40  
41  
42  
43  
44  
45  
46

**Table S4. Comparing the risk of adverse pregnancy outcomes in meta-analysis with risk observed in the UK in order to scale meta-analysis data**

| Pregnancy outcome                   | Meta-analysis data [2]<br>A | UK data [n/N]<br>B              | UK vs. meta-analysis<br>C | UK data reference |
|-------------------------------------|-----------------------------|---------------------------------|---------------------------|-------------------|
| <b>Women with no syphilis</b>       |                             |                                 |                           |                   |
| Preterm delivery                    | 7.2%                        | 7.485% [57,079/762,594]         | 104.0%                    | <b>Table S10</b>  |
| IUFD (stillbirth)                   | 3.7%                        | 0.393% [3.93/1000] <sup>1</sup> | 10.6%                     | [5]               |
| Neonatal death                      | 2.0%                        | 0.172% [1.72/1000] <sup>1</sup> | 8.6%                      | [5]               |
| <b>Women with syphilis</b>          |                             |                                 |                           |                   |
| Congenital syphilis (any trimester) | 13.7%                       | 1.28% [3.4/266] <sup>2</sup>    | 9.4%                      | [3,4]             |

<sup>1</sup>The most recent data on pregnancy outcomes from the UK were from 2016 when the total number of pregnancies in the UK was 780,043 [5]. Pregnancy outcomes reported from the UK as a whole are used for the no syphilis group.

<sup>2</sup>Based on the numbers in our model, we would expect at total of 266 women in 2017/18 to have syphilis in pregnancy i.e. 254 women at the start of pregnancy [0.00035\*725,891] plus 12 women infected during pregnancy [0.000017\*725,637].

No data on the risk of the different pregnancy outcomes during each trimester were available from the UK. Therefore, the difference in overall risk in pregnancy between the UK and the metanalysis data was used to adjust data from the meta-analysis to calculate the risk of outcomes in each trimester for women in the UK. The calculated risks, used in the model, are presented in **Table S5** and an example of how they were calculated is included in the **Table S5** footnotes.

Table S5. Pregnancy outcome data used in the model – adjusted from published large meta-analysis of international studies [2] to reflect UK risks

| Pregnancy outcome   | Women with no syphilis | Syphilis infection at time of conception           |                                                    |                                                      |                                                    | Becomes infected during pregnancy |                                                     |              |
|---------------------|------------------------|----------------------------------------------------|----------------------------------------------------|------------------------------------------------------|----------------------------------------------------|-----------------------------------|-----------------------------------------------------|--------------|
|                     |                        | First screen + treatment 1 <sup>st</sup> trimester | First screen + treatment 2 <sup>nd</sup> trimester | First screen + treatment 1/2 <sup>nd</sup> trimester | First screen + treatment 3 <sup>rd</sup> trimester | No treatment                      | Repeat screen + treatment 3 <sup>rd</sup> trimester | No treatment |
| Congenital syphilis | 0.0%                   | 0.97%                                              | 1.65%                                              | 1.14%                                                | 3.80%                                              | 3.37%                             | 0.97%                                               | 50.0%        |
| Preterm delivery    | 7.48%                  | 7.07%                                              | 10.50%                                             | 7.90%                                                | 18.03%                                             | 24.12%                            | 7.07%                                               | 24.12%       |
| IUFD (stillbirth)   | 0.39%                  | 0.56%                                              | 0.45%                                              | 0.53%                                                | 2.26%                                              | 2.80%                             | 0.56%                                               | 2.80%        |
| Neonatal death      | 0.17%                  | 0.32%                                              | 0.26%                                              | 0.31%                                                | 1.30%                                              | 1.39%                             | 0.32%                                               | 1.39%        |

These numbers were calculated using data from a meta-analysis (**Table S3**) adjusted by the difference in the (overall) risk of pregnancy outcomes between the UK and the meta-analysis (**Table S4**, column C).

For example, the risk of congenital syphilis (CS) in women treated for syphilis in the 1<sup>st</sup>/2<sup>nd</sup> trimester (1.14%) was calculated as follows:  $(0.121 \times 0.094) = 0.0114$  i.e. the risk of CS in the 1<sup>st</sup>/2<sup>nd</sup> trimester from the meta-analysis (**Table S3**, column C) multiplied by the proportional in of risk of CS in pregnancy in the UK vs. the meta-analysis (**Table S4**, column C).

The published 95% confidence intervals were adjusted in the same way to calculate the low and high values used in the sensitivity analysis.

**Table S6. Overall number of women screened for syphilis in pregnancy, 2017/18**

| Country          | Total number of deliveries | Estimated number screened | Reference |
|------------------|----------------------------|---------------------------|-----------|
| England          | 626,203                    | 623,698                   | [36]      |
| Northern Ireland | 23,045                     | 23,038                    | [38]      |
| Scotland         | 51,197                     | 50,992                    | [39]      |
| Wales            | 28,361                     | 28,248                    | [40]      |
| UK total         | 728,806                    | 725,976                   |           |

In England, Wales and Scotland, these data exclude women giving birth at home or in non-NHS hospitals.

Screening uptake in 2017/2018 for England, Wales and Scotland was estimated as 99.6% i.e. the same as uptake in England in 2016/2017 [15].

The uptake of screening in 2017/2018 for Northern Ireland was 99.97%, based on data collected by Public Health Agency Northern Ireland 2017/2018.

**Table S7. Gestational week at first antenatal care attendance – by UK country**

| UK country       | <12 weeks |       | 12-28 weeks |       | ≥28 weeks |      | No data  | With data available | Total  | Reference |
|------------------|-----------|-------|-------------|-------|-----------|------|----------|---------------------|--------|-----------|
|                  | n         | %     | n           | %     | n         | %    |          |                     |        |           |
| England          | 299,634   | 70.1% | 103,137     | 24.1% | 24,935    | 5.8% | ~200,000 | 427,706             | -      | [6]       |
| Northern Ireland | 15,069    | 65.4% | 7,607       | 33.0% | 365       | 1.6% | 4        | 23,041              | 23,045 | [7]       |
| Scotland         | 42,840    | 84.2% | 5,876       | 11.5% | 2,165     | 4.3% | 316      | 50,881              | 51,197 | [8]       |
| Wales            | 22,878    | 82.2% | 4,226       | 15.2% | 745       | 2.7% | 512      | 27,849              | 28,361 | [9]       |
| UK total         | 380,421   | 71.8% | 120,846     | 22.8% | 28,210    | 5.3% |          | 529,477             |        |           |

All data are for year 2017/18. The SASS study [3] found that in women screening positive for syphilis, 6.4% (81/1271) had their first antenatal attendance at 27 weeks or later. These data were used to calculate pregnancy outcomes and the percentage of women receiving a first syphilis screen before 28 weeks gestation (94.7% i.e. 501,267/529,477).

**Table S8. Calculating the cost per antenatal syphilis screen**

| Activity                           | Cost per item (£) | Proportion with cost | Average cost/person (£) | Notes                                                                                                                                                                                                                                                                                                                                                                                            |
|------------------------------------|-------------------|----------------------|-------------------------|--------------------------------------------------------------------------------------------------------------------------------------------------------------------------------------------------------------------------------------------------------------------------------------------------------------------------------------------------------------------------------------------------|
| Blood sample collection            | 0.23              | 1.00                 | 0.23                    | Includes only equipment costs. Syphilis screening is performed at the same time as other antenatal screening tests – and therefore does not incur additional staff time.                                                                                                                                                                                                                         |
| Laboratory testing (higher cost)   | 16.50             | 0.50                 | 8.25                    | Price quoted in London Sexual Health full STI screen tariff [10].                                                                                                                                                                                                                                                                                                                                |
| Laboratory testing (lower cost)    | 9.00              | 0.50                 | 4.50                    | Price quoted by laboratory manager in Leeds. This is the price charged per screen. It covers consumables, internal quality control (IQC), external quality assessment (EQA), laboratory staff time, and overheads. It accounts for the ratio of negative (which require only one test), positive (which require confirmatory work) test results.                                                 |
| Input from multi-disciplinary team | 37.50             | 0.002                | 0.08                    | Estimate 1/500 women require 30 minutes input from the MDT based on expert opinion.                                                                                                                                                                                                                                                                                                              |
| Reference laboratory testing       | 40.00             | 0.003                | 0.10                    | Estimate 1/400 samples sent to reference laboratory for confirmatory testing based on England's central reference lab receiving ~1300 samples/year (personal communication with laboratory manager).                                                                                                                                                                                             |
| Repeat test blood collection       | 3.86              | 0.01                 | 0.04                    | 1/100 women require a repeat test due to inconclusive test results. This cost is taken from London Sexual Health full STI screen tariff [10].                                                                                                                                                                                                                                                    |
| Laboratory testing (higher cost)   | 16.50             | 0.005                | 0.08                    | Repeat test due to inconclusive test result from first assay.                                                                                                                                                                                                                                                                                                                                    |
| Laboratory testing (lower cost)    | 9.00              | 0.005                | 0.05                    | Repeat test due to inconclusive test result from first assay.                                                                                                                                                                                                                                                                                                                                    |
| Referral to sexual health clinic   | 56.60             | 0.0006               | 0.04                    | Women with positive result for antibodies are referred to Sexual Health Clinic for sexual history and risk assessment. Cost based on a 30-minute appointment with a consultant plus 5 mins of receptionist time (staff costs taken from PSSRU 2017/18 [11]). Proportion taken from SASS study [3] which found 607/961,494 women had positive antibody result but did not then require treatment. |
| <b>Total</b>                       |                   |                      | <b>13.36</b>            |                                                                                                                                                                                                                                                                                                                                                                                                  |

1  
2  
3 Footnote: A 50:50 split between the higher and lower costs for laboratory tests was used. The cost of a repeat screen was assumed to be the same as the  
4 cost of a first screen since in both cases, samples would be taken at a routine antenatal appointment when other blood tests are performed, i.e. HIV and  
5 hepatitis B screening at first screen and routine anaemia blood tests at 28 weeks gestation.  
6  
7  
8  
9  
10  
11  
12  
13  
14  
15  
16  
17  
18  
19  
20  
21  
22  
23  
24  
25  
26  
27  
28  
29  
30  
31  
32  
33  
34  
35  
36  
37  
38  
39  
40  
41  
42  
43  
44  
45  
46

For peer review only



**Table S9. Calculating the cost of treatment and management of women diagnosed with syphilis in pregnancy**

| <b>Activity</b>                                                 | <b>Cost per woman (£)</b> | <b>Notes</b>                                                                                                                                                                                                                                                                                                                                                                                                                                                 |
|-----------------------------------------------------------------|---------------------------|--------------------------------------------------------------------------------------------------------------------------------------------------------------------------------------------------------------------------------------------------------------------------------------------------------------------------------------------------------------------------------------------------------------------------------------------------------------|
| STI Intervention C - Management of reactive treponemal serology | 262.34                    | Cost taken from the London Integrated Sexual Health Tariff 2017/18 which includes 5 visits to clinic for treatment with penicillin regimen appropriate for the stage of infection [1,10].<br>In pregnant women diagnosed in the first trimester, all 5 visits would occur before delivery, in women diagnosed in final trimester, 3/5 visits would occur before delivery and 2 after delivery (personal communication with senior sexual health consultant). |
| Additional cost at 1 <sup>st</sup> visit                        | 16.50                     | Additional cost due to patient being seen by consultant doctor instead of by doctor/nurse mix [11].                                                                                                                                                                                                                                                                                                                                                          |
| Additional cost at 2 <sup>nd</sup> visit                        | 8.25                      | Additional cost due to patient being seen by consultant doctor instead of by doctor/nurse mix [11].                                                                                                                                                                                                                                                                                                                                                          |
| Additional cost at 5 <sup>th</sup> visit                        | 27.00                     | Additional cost due to patient being seen by consultant doctor instead of by doctor/nurse mix [11].                                                                                                                                                                                                                                                                                                                                                          |
| <b>Total</b>                                                    | <b>314.09</b>             |                                                                                                                                                                                                                                                                                                                                                                                                                                                              |

There would be no change to the staff grade (from the tariff) at the 3<sup>rd</sup> or 4<sup>th</sup> visit, when the patient would be seen by a nurse.

This cost was calculated based on expert opinion from a senior consultant in sexual health.

**Table S10. Gestational week at delivery (used for calculating delivery costs and estimating pregnancy outcomes)**

| Country          | ≤33 weeks |      | 34-36 weeks |      | >36 weeks |       | No data | With data available | Total  | Ref  | Notes        |
|------------------|-----------|------|-------------|------|-----------|-------|---------|---------------------|--------|------|--------------|
|                  | n         | %    | n           | %    | n         | %     |         |                     |        |      |              |
| England          | 13,846    | 2.1% | 35,533      | 5.4% | 607,972   | 92.5% |         | 657,351             | -      | [19] | 2014 data    |
| Northern Ireland | 470       | 2.0% | 1,385       | 6.0% | 21,190    | 92.0% | 0       | 23,045              | 23,045 | [7]  | 2017/18 data |
| Scotland         | 868       | 1.7% | 2,444       | 4.9% | 46,791    | 93.4% | 207     | 50,103              | 50,310 | [8]  | 2017/18 data |
| Wales            | 723       | 2.3% | 1,810       | 5.6% | 29,562    | 92.1% | 141     | 32,095              | 32,236 | [20] | 2017 data    |
| UK total         | 15,907    | 2.1% | 41,172      | 5.4% | 705,515   | 92.5% |         | 762,594             |        |      |              |

1  
2  
3  
4  
5  
6  
7  
8  
9  
10  
11  
12  
13  
14  
15  
16  
17  
18  
19  
20  
21  
22  
23  
24  
25  
26  
27  
28  
29  
30  
31  
32  
33  
34  
35  
36  
37  
38  
39  
40  
41  
42  
43  
44  
45  
46

**Table S11. Calculating the average healthcare costs associated with a neonatal death**

| Activity          | Resource/<br>Activity | Quantity | Cost per unit | Total cost       | Ref    | Notes:                                                                                |
|-------------------|-----------------------|----------|---------------|------------------|--------|---------------------------------------------------------------------------------------|
| Cost of IUFD      | -                     | -        | -             | £4,356.80        | [12]   |                                                                                       |
| Hospital stay     | Day                   | 3        | £483.00       | £1,449.00        | [1,13] | Based on NHS tariff for Paediatric Major Infections with CC Score 0 - HRG code PW16E. |
| <b>Total cost</b> |                       |          |               | <b>£5,805.80</b> |        |                                                                                       |

The cost of neonatal death is calculated using the cost of intrauterine fetal demise (IUFD), which includes the cost of post-mortem, parental counselling and a subsequent pregnancy, plus an additional 3-days in a paediatric intensive care unit for the neonate. Three days hospital stay is an estimate based on expert opinion.

For peer review only

**Table S12. Calculating the cost of testing for syphilis in neonates with clinical signs of congenital syphilis (CS)**

| Activity                                                    | Number   |             | Resource type | Resource/ Activity            | Quantity /minutes         | Cost per unit/hour (£) | Cost per neonate (£) | Ref  | Notes                                                                        |
|-------------------------------------------------------------|----------|-------------|---------------|-------------------------------|---------------------------|------------------------|----------------------|------|------------------------------------------------------------------------------|
|                                                             | At birth | After birth |               |                               |                           |                        |                      |      |                                                                              |
| Clinical assessment for signs of CS                         | 1        |             | Staff time    | Consultant paediatrician      | 30                        | 108.00                 | 54.00                | [11] |                                                                              |
| Review of syphilis test results                             |          | 8           | Staff time    | Consultant paediatrician      | 10 per review             | 108.00                 | 144.00               | [11] |                                                                              |
| RPR/VDRL blood test                                         | 1        | 4           | Staff time    | Blood taken by nurse (band 6) | 10 per test               | 45.00                  | 37.50                | [11] | Test at birth, 1, 3, 6 and 12 months.                                        |
| IgM EIA blood test                                          | 1        | 2           | Staff time    | Blood taken by nurse          | 10 per test               | 45.00                  | 22.50                | [11] | Test at birth, 1 and 3 months.                                               |
| Syphilis blood tests (as above)                             | 2        | 6           | Diagnostics   | Laboratory tests              | 5 (3 combined + 2 single) | 12.75                  | 63.75                |      | Same cost if both tests are performed or only RPR/VDRL blood test performed. |
| Blood tests: full blood count, liver function, electrolytes | 1        |             | Staff time    | Blood taken by nurse          | 10                        | 45.00                  | 7.50                 | [11] |                                                                              |
| Blood tests (as above)                                      | 1        |             | Diagnostics   | Laboratory tests              | 1                         | 20.00                  | 20.00                |      | Estimate                                                                     |
| Lumbar puncture (white blood cell, protein, RPR, TPPA)      | 1        |             | Staff time    | Paediatric registrar          | 45                        | 43.00                  | 32.25                | [11] |                                                                              |
| Blood tests (as above)                                      | 1        |             | Diagnostics   | Laboratory tests              | 1                         | 20.00                  | 20.00                |      | Estimate                                                                     |
| X-ray of long bones                                         | 1        |             | Staff time    | Consultant Radiographer       | 30                        | 93.00                  | 46.50                | [11] | Based on cost of Band 8c Radiographer                                        |

Continued over the page.

Table S12 Continued from previous page.

| Activity                                                 | Number<br>At<br>birth | After<br>birth | Resource<br>type | Resource/<br>Activity                    | Quantity<br>/minutes | Cost per<br>unit/hour<br>(£) | Cost per<br>neonate<br>(£) | Ref  | Notes                                    |
|----------------------------------------------------------|-----------------------|----------------|------------------|------------------------------------------|----------------------|------------------------------|----------------------------|------|------------------------------------------|
| Chest x-ray                                              | 1                     |                | Staff time       | Consultant<br>Radiographer               | 30                   | 93.00                        | 46.50                      | [11] | Based on cost of Band<br>8c Radiographer |
| X-ray film                                               | 1                     |                | Diagnostics      | Diagnostic tests                         | 2                    | 25.00                        | 50.00                      | [14] |                                          |
| Ophthalmic assessment                                    | 1                     |                | Staff time       | Consultant<br>Ophthalmologist            | 30                   | 108.00                       | 54.00                      | [11] |                                          |
| Audiology review                                         | 1                     |                | Staff time       | Audiologist<br>(Associate<br>specialist) | 10                   | 105.00                       | 17.50                      | [11] |                                          |
| Sample taken for<br>microscopy/PCR                       | 1                     |                | Staff time       | Nurse (band 6)                           | 10                   | 45.00                        | 7.50                       | [11] |                                          |
| Dark ground microscopy and<br>PCR for <i>T. pallidum</i> | 1                     |                | Diagnostics      | Laboratory tests                         | 1                    | 20.00                        | 20.00                      |      | Estimate                                 |
| Results review and liaison with<br>sexual health team    | 1                     |                | Staff time       | Consultant<br>paediatrician              | 60                   | 108.00                       | 108.00                     | [11] |                                          |
| <b>Total cost</b>                                        |                       |                |                  |                                          |                      |                              | <b>751.50</b>              |      |                                          |

RPR/VDRL, rapid plasma reagent/venereal disease research lab test. Detailed testing protocol was obtained from Clinical Guidelines [1] and expert opinion.

**Table S13. Calculating the cost of treating neonates with congenital syphilis (CS)**

| Activity                                                                     | N  | Resource type | Resource/ Activity                 | Unit          | Cost per unit (£) | Cost per neonate (£) | Reference | Notes                                                                                 |
|------------------------------------------------------------------------------|----|---------------|------------------------------------|---------------|-------------------|----------------------|-----------|---------------------------------------------------------------------------------------|
| <b>Neonates with signs of CS at delivery (40%)</b>                           |    |               |                                    |               |                   |                      |           |                                                                                       |
| Treatment for CS                                                             | 23 | Medication    | Penicillin (dose 30mg/kg)          | 105mg dose    | 3.00              | 12.08                | [1,15,16] | Dose calculated using average birthweight of 3.5kg.                                   |
| Treatment for CS                                                             | 23 | Medication    | Glucose 5% or sodium chloride 0.9% | Infusion bag  | 2.14              | 49.22                | [1,15,16] | Standard sized infusion bags are used with the surplus discarded.                     |
| Hospital stay                                                                | 10 | Tariff cost   | Hospital stay                      | Days          | 721.00            | 7,210.00             | [1,13,17] | Based on NHS tariff for Neonatal Diagnoses with CC Score 0 - HRG code PB04D.          |
| <b>Neonates with signs of CS days/weeks after delivery (60%)</b>             |    |               |                                    |               |                   |                      |           |                                                                                       |
| Treatment for CS                                                             | 30 | Medication    | Penicillin (dose 30mg/kg)          | 123.75mg dose | 3.00              | 18.56                | [1,15,16] | Dose calculated using average weight at 1 month of 4.125kg.                           |
| Treatment for CS                                                             | 30 | Medication    | Glucose 5% or sodium chloride 0.9% | Infusion bag  | 2.14              | 64.20                | [1,15,16] | Standard sized infusion bags are used with the surplus discarded.                     |
| Hospital stay                                                                | 10 | Tariff cost   | Hospital stay                      | Days          | 483.00            | 4,830.00             | [1,13,17] | Based on NHS tariff for Paediatric Major Infections with CC Score 0 - HRG code PW16E. |
| <b>Total cost of treating neonates with CS (based on 40%/60% split)</b>      |    |               |                                    |               |                   | <b>5,856.18</b>      |           |                                                                                       |
| <b>Total cost of testing and treating neonates with clinical signs of CS</b> |    |               |                                    |               |                   | <b>6,607.68</b>      |           |                                                                                       |

CS, congenital syphilis. Clinical guidelines recommend that treatment is given every 12 hours (for infants  $\leq 7$  days of age) and every 8 hours (for infants  $> 7$  days of age) for a total of 10 days with treatment typically starting on the day of delivery.

**Table S14. Calculating the cost of neonate screening in infants born to mothers treated for syphilis in pregnancy**

| Activity                            | Number   |             | Resource type | Resource/ Activity       | Quantity/ minutes | Cost per unit/hour (£) | Cost per neonate (£) | Ref  | Notes                                                                                                           |
|-------------------------------------|----------|-------------|---------------|--------------------------|-------------------|------------------------|----------------------|------|-----------------------------------------------------------------------------------------------------------------|
|                                     | At birth | After birth |               |                          |                   |                        |                      |      |                                                                                                                 |
| Clinical assessment for signs of CS | 1        |             | Staff time    | Consultant paediatrician | 30                | 108.00                 | 54.00                | [11] |                                                                                                                 |
| Review of test results              |          | 6           | Staff time    | Consultant paediatrician | 10 per review     | 108.00                 | 108.00               | [11] |                                                                                                                 |
| RPR/VDRL blood test                 | 1        | 2           | Staff time    | Blood taken by nurse     | 10 per test       | 45.00                  | 22.50                | [11] | Tests every three months until RPR is negative (this usually occurs by six months). Cost based on band 6 nurse. |
| IgM EIA blood test                  | 1        | 2           | Staff time    | Blood taken by nurse     | 10 per test       | 45.00                  | 22.50                | [11] |                                                                                                                 |
| Syphilis blood tests (as above)     | 2        | 4           | Diagnostics   | Laboratory tests         | 3 sets of tests   | 12.75                  | 38.25                | [10] | Based on average combined cost for tests.                                                                       |
| <b>Total cost</b>                   |          |             |               |                          |                   |                        | <b>£245.25</b>       |      |                                                                                                                 |

CS, congenital syphilis; IgM EIA, immunoglobulin M enzyme immunoassay; RPR/VDRL, rapid plasma reagent/veneral disease research lab test.

**Table S15. Long-term health care and social care costs associated with congenital syphilis (CS) – results of the model comparing universal repeat screening of syphilis in late pregnancy with single screening**

|                                         | Short-term costs<br>[Antenatal +<br>postnatal] | Long-term<br>costs <sup>1</sup> | Lifetime costs<br>[short + long-<br>term] | Total QALYs |
|-----------------------------------------|------------------------------------------------|---------------------------------|-------------------------------------------|-------------|
| Single screen                           | £1,777,469,008                                 | £5,754,176                      | £1,783,223,184                            | 19,464,817  |
| Universal repeat screen                 | £1,787,355,870                                 | £2,160,086                      | £1,789,515,957                            | 19,464,869  |
| Difference                              | £9,886,863                                     | -£3,594,090                     | £6,292,773                                | 52.2        |
| ICER                                    |                                                |                                 |                                           | £120,494    |
| <b>DSA: No discounting of utilities</b> |                                                |                                 |                                           |             |
| Single screen                           | £1,777,469,008                                 | £5,754,176                      | £1,783,223,184                            | 58,444,492  |
| Universal repeat screen                 | £1,787,355,870                                 | £2,160,086                      | £1,789,515,957                            | 58,444,684  |
| Difference                              | £9,886,863                                     | -£3,594,090                     | £6,292,773                                | 192.3       |
| ICER                                    |                                                |                                 |                                           | £32,716     |
| <b>DSA: 6% discounting of utilities</b> |                                                |                                 |                                           |             |
| Single screen                           | £1,777,469,008                                 | £5,754,176                      | £1,783,223,184                            | 11,948,666  |
| Universal repeat screen                 | £1,787,355,870                                 | £2,160,086                      | £1,789,515,957                            | 11,948,686  |
| Difference                              | £9,886,863                                     | -£3,594,090                     | £6,292,773                                | 30.6        |
| ICER                                    |                                                |                                 |                                           | £205,600    |

DSA, deterministic sensitivity analysis; ICER, Incremental cost-effectiveness ratio. Lifetime costs and utilities were discounted at 3.5% unless otherwise stated. Data presented are for all women screened for syphilis in one year (n=725,891).

<sup>1</sup>Additional lifetime health and social care costs for individuals born with CS (£651,387 per individual) - adapted from a study of lifetime costs of cerebral palsy in Denmark [18]. The social care costs include specialised schooling, and after school care, support to parents, residential institutions, supervised workshops, day centre, and other adult support services.



**Table S16. Clinical outcomes for Scenario 3 (0.00012 probability of syphilis infection in pregnancy)**

| Strategy                   | Syphilis antenatal screens | Women treated for syphilis | False positive screens | Intrauterine fetal demise | Preterm deliveries | Neonatal deaths | Congenital syphilis |
|----------------------------|----------------------------|----------------------------|------------------------|---------------------------|--------------------|-----------------|---------------------|
| Existing: single screen    | 725,891                    | 1,709                      | 1,451                  | 2,906.1                   | 54,240             | 1,447           | 43.2                |
| Alternative: repeat screen | 1,411,696                  | 3,163                      | 2,823                  | 2,904.3                   | 54,226             | 1,446           | 4.2                 |
| Difference                 | 685,805                    | 1,455                      | 1,371                  | -1.8                      | -13                | -0.9            | -39.0               |

**Table S17. Cost outcomes for Scenario 3 (0.00012 probability of syphilis infection in pregnancy)**

| Cost                       | Total           | Antenatal screening | Syphilis treatment (in pregnant women) | Perinatal costs |
|----------------------------|-----------------|---------------------|----------------------------------------|-----------------|
| Existing: single screen    | £ 1,777,764,124 | £ 9,697,904         | £ 536,669                              | £ 1,767,529,551 |
| Alternative: repeat screen | £ 1,787,402,601 | £ 18,860,259        | £ 993,521                              | £ 1,767,548,821 |
| Difference                 | £ 9,638,476     | £ 9,162,355         | £ 456,852                              | £ 19,270        |

**Table S18. Requirements to prevent one outcome for Scenario 3 (0.00012 probability of syphilis infection in pregnancy)**

| Outcome             | Cost        | Women screened in third trimester | Women treated for syphilis – TP and FP | Additional false positives |
|---------------------|-------------|-----------------------------------|----------------------------------------|----------------------------|
| Congenital syphilis | £247,284    | 17,595                            | 37                                     | 35                         |
| IUFD                | £5,332,625  | 379,431                           | 805                                    | 759                        |
| Neonatal death      | £11,063,507 | 787,200                           | 1,670                                  | 1,574                      |

TP, True positive; FP, False positive

Table S19. Short and long-term cost outcomes for Scenario 3 (higher syphilis incidence in pregnancy)

| Syphilis incidence<br>(new infections<br>between screens) |         | Screening<br>Strategy | Short-term costs | Pregnancy outcomes |          |                   |                        | Short-term<br>cost per CS<br>case<br>prevented | Lifetime<br>health and<br>social care<br>costs |
|-----------------------------------------------------------|---------|-----------------------|------------------|--------------------|----------|-------------------|------------------------|------------------------------------------------|------------------------------------------------|
| Probability (%)                                           |         |                       |                  | IUFD               | Preterm  | Neonatal<br>death | Congenital<br>syphilis |                                                | ICER                                           |
| 0.00003                                                   | (0.003) | Single                | £1,777,506,256   | 2,904.6            | 54,229.9 | 1,446.6           | 13.2                   |                                                |                                                |
|                                                           |         | Repeat                | £1,787,361,768   | 2,904.1            | 54,226.5 | 1,446.4           | 3.4                    |                                                |                                                |
|                                                           |         | Difference            | £9,855,513       | -0.5               | -3.4     | -0.2              | -9.7                   | £1,011,791                                     | £38,140                                        |
| 0.00004                                                   | (0.004) | Single                | £1,777,534,908   | 2,904.8            | 54,231.0 | 1,446.7           | 16.5                   |                                                |                                                |
|                                                           |         | Repeat                | £1,787,366,305   | 2,904.1            | 54,226.4 | 1,446.4           | 3.5                    |                                                |                                                |
|                                                           |         | Difference            | £9,831,398       | -0.6               | -4.5     | -0.3              | -13.0                  | £756,892                                       | £11,171                                        |
| 0.00005                                                   | (0.005) | Single                | £1,777,563,560   | 2,904.9            | 54,232.1 | 1,446.8           | 19.8                   |                                                |                                                |
|                                                           |         | Repeat                | £1,787,370,842   | 2,904.2            | 54,226.4 | 1,446.4           | 3.6                    |                                                |                                                |
|                                                           |         | Difference            | £9,807,283       | -0.8               | -5.7     | -0.4              | -16.2                  | £603,983                                       | Cost saving                                    |
| 0.00006                                                   | (0.006) | Single                | £1,777,592,212   | 2,905.1            | 54,233.1 | 1,446.9           | 23.2                   |                                                |                                                |
|                                                           |         | Repeat                | £1,787,375,379   | 2,904.2            | 54,226.4 | 1,446.4           | 3.7                    |                                                |                                                |
|                                                           |         | Difference            | £9,783,167       | -0.9               | -6.8     | -0.4              | -19.5                  | £502,056                                       | Cost saving                                    |
| 0.00007                                                   | (0.007) | Single                | £1,777,620,864   | 2,905.2            | 54,234.2 | 1,446.9           | 26.5                   |                                                |                                                |
|                                                           |         | Repeat                | £1,787,379,916   | 2,904.2            | 54,226.4 | 1,446.4           | 3.8                    |                                                |                                                |
|                                                           |         | Difference            | £9,759,052       | -1.1               | -7.9     | -0.5              | -22.7                  | £429,258                                       | Cost saving                                    |
| 0.00008                                                   | (0.008) | Single                | £1,777,649,516   | 2,905.4            | 54,235.3 | 1,447.0           | 29.9                   |                                                |                                                |
|                                                           |         | Repeat                | £1,787,384,453   | 2,904.2            | 54,226.3 | 1,446.4           | 3.9                    |                                                |                                                |
|                                                           |         | Difference            | £9,734,937       | -1.2               | -9.0     | -0.6              | -26.0                  | £374,662                                       | Cost saving                                    |

Table continued over the page.

Table S19. Continued from previous page.

| Syphilis incidence<br>(new infections<br>between screens) |         | Screening<br>Strategy | Short-term costs | Pregnancy outcomes |          |                   |                        | Short-term<br>cost per CS<br>case<br>prevented | Lifetime<br>health and<br>social care<br>costs |
|-----------------------------------------------------------|---------|-----------------------|------------------|--------------------|----------|-------------------|------------------------|------------------------------------------------|------------------------------------------------|
| Probability (%)                                           |         |                       |                  | IUFD               | Preterm  | Neonatal<br>death | Congenital<br>syphilis |                                                | ICER                                           |
| 0.00009                                                   | (0.009) | Single                | £1,777,678,168   | 2,905.6            | 54,236.4 | 1,447.1           | 33.2                   | £332,201                                       | Cost saving                                    |
|                                                           |         | Repeat                | £1,787,388,990   | 2,904.2            | 54,226.3 | 1,446.4           | 4.0                    |                                                |                                                |
|                                                           |         | Difference            | £9,710,822       | -1.4               | -10.1    | -0.7              | -29.2                  |                                                |                                                |
| 0.0001                                                    | (0.01)  | Single                | £1,777,706,820   | 2,905.7            | 54,237.5 | 1,447.2           | 36.5                   | £298,234                                       | Cost saving                                    |
|                                                           |         | Repeat                | £1,787,393,527   | 2,904.2            | 54,226.3 | 1,446.4           | 4.1                    |                                                |                                                |
|                                                           |         | Difference            | £9,686,707       | -1.5               | -11.2    | -0.7              | -32.5                  |                                                |                                                |
| 0.00011                                                   | (0.011) | Single                | £1,777,735,472   | 2,905.9            | 54,238.6 | 1,447.3           | 39.9                   | £270,443                                       | Cost saving                                    |
|                                                           |         | Repeat                | £1,787,398,064   | 2,904.3            | 54,226.3 | 1,446.5           | 4.1                    |                                                |                                                |
|                                                           |         | Difference            | £9,662,592       | -1.7               | -12.4    | -0.8              | -35.7                  |                                                |                                                |
| 0.00012                                                   | (0.012) | Single                | £1,777,764,124   | 2,906.1            | 54,239.7 | 1,447.3           | 43.2                   | £247,284                                       | Cost saving                                    |
|                                                           |         | Repeat                | £1,787,402,601   | 2,904.3            | 54,226.2 | 1,446.5           | 4.2                    |                                                |                                                |
|                                                           |         | Difference            | £9,638,476       | -1.8               | -13.5    | -0.9              | -39.0                  |                                                |                                                |

CS, congenital syphilis; ICER, IUFD, Intrauterine foetal demise; ICER, Incremental cost-effectiveness ratio. Lifetime costs and utilities were discounted at 3.5%.

<sup>1</sup>Lifetime health and social care costs adapted from a study of lifetime costs of cerebral palsy in Denmark [18]. The social care costs include specialised schooling, and after school care, support to parents, residential institutions, supervised workshops, day centre, and other adult support services.

**Table S20. Cost per screen needed to meet NICE ICER thresholds (Scenario 7)**

| Threshold of interest                                 | Per screen cost required to achieve threshold | Incremental cost-effectiveness ratio (ICER) | Additional short-term cost (repeat screen vs. single screen) | Cost per CS case avoided (short-term cost) |
|-------------------------------------------------------|-----------------------------------------------|---------------------------------------------|--------------------------------------------------------------|--------------------------------------------|
| Long-term health and social care costs and utilities  |                                               |                                             |                                                              |                                            |
| £100k ICER threshold                                  | £11.79                                        | £99,877.04                                  | £8,810,149                                                   | £1,596,738                                 |
| £30k ICER threshold                                   | £6.46                                         | £29,884.61                                  | £5,154,808                                                   | £934,250                                   |
| £20k ICER threshold                                   | £5.70                                         | £19,904.45                                  | £4,633,596                                                   | £839,786                                   |
| Per screen cost half the baseline value (used in DSA) | £6.68                                         | £32,773.60                                  | £5,305,685                                                   | £961,594                                   |

CS, congenital syphilis; DSA, deterministic sensitivity analysis. ICERs were calculated using the additional lifetime health and social care cost of CS (£651,387) as used in Scenario 1 adapted from a study of lifetime costs of cerebral palsy in Denmark [18]. Per screen cost was calculated to the nearest penny. Lifetime costs and utilities were discounted at 3.5%.

## References

- 1 Kingston M, French P, Higgins S, *et al.* UK national guidelines on the management of syphilis 2015. *Int J STD AIDS* 2016;**27**:421–46. doi:10.1177/0956462415624059
- 2 Qin J, Yang T, Xiao S, *et al.* Reported Estimates of Adverse Pregnancy Outcomes among Women with and without Syphilis: A Systematic Review and Meta-Analysis. *PLoS ONE* 2014;**9**:e102203. doi:10.1371/journal.pone.0102203
- 3 Townsend CL, Francis K, Peckham CS, *et al.* Syphilis screening in pregnancy in the United Kingdom, 2010–2011: a national surveillance study. *BJOG* 2017;**124**:79–86. doi:10.1111/1471-0528.14053
- 4 Simms I, Tookey PA, Goh BT, *et al.* The incidence of congenital syphilis in the United Kingdom: February 2010 to January 2015. *BJOG* 2017;**124**:72–7. doi:10.1111/1471-0528.13950
- 5 MBRRACE-UK. Perinatal Mortality Surveillance Report. UK Perinatal Deaths for Births from January to December 2016. [www.npeu.ox.ac.uk](http://www.npeu.ox.ac.uk) (Accessed 12 Mar 2020).
- 6 NHS Digital. NHS Maternity Statistics, England 2017–18. 2018. <https://digital.nhs.uk/data-and-information/publications/statistical/nhs-maternity-statistics/2017-18> (Accessed 12 Mar 2020).
- 7 Northern Ireland Maternity System data provided on request from the Public Health Agency (Health Intelligence Unit), Northern Ireland. July 2018.
- 8 Data provided on request by ISD NHS Scotland’s Population Health: Maternity, Sexual Health and Unintentional Injuries Team. July 2018.
- 9 Data provided on request by the Welsh Government’s Knowledge and Analytic Services, Health & Social Services Group. July 2018.
- 10 Pathway Analytics. Integrated Sexual Health Tariff - London ISHT 2017/2018. <https://www.pathwayanalytics.com/> (Accessed 12 Mar 2020).
- 11 Curtis, L. & Burns, A. (2018) Unit Costs of Health and Social Care 2018, Personal Social Services Research Unit, University of Kent, Canterbury. <https://www.pssru.ac.uk/project-pages/unit-costs/unit-costs-2018/> (Accessed 12 Mar 2020).

- 1  
2  
3 12 Campbell H, Kurinczuk J, Heazell A, *et al.* Healthcare and wider societal implications of stillbirth:  
4 a population-based cost-of-illness study. *BJOG: Int J Obstet Gy* 2018;**125**:108–17.  
5 doi:10.1111/1471-0528.14972  
6  
7  
8  
9 13 NHS Improvement. 2017/18 National Prices and National tariff workbook. 2017.  
10 <https://improvement.nhs.uk/resources/national-tariff-1719/> (Accessed 12 Mar 2020).  
11  
12  
13 14 NHS Improvement. Non mandatory currencies and prices 2017/2018. 2017.  
14 <https://improvement.nhs.uk/resources/national-tariff-1719/> (Accessed 12 Mar 2020).  
15  
16  
17 15 BNF: British National Formulary - NICE. <https://bnf.nice.org.uk/> (Accessed 12 Mar 2020).  
18  
19  
20 20 16 WHO Child Growth Standards. [http://www.who.int/childgrowth/standards/weight\\_for\\_age/en/](http://www.who.int/childgrowth/standards/weight_for_age/en/)  
21 (Accessed 12 Mar 2020).  
22  
23  
24 25 17 Owusu-Edusei KJ, Introcaso CE, Chesson HW. Hospitalization Cost of Congenital Syphilis  
26 Diagnosis From Insurance Claims Data in the United States. *Sexually Transmitted Diseases*  
27 2013;**40**:226. doi:10.1097/OLQ.0b013e31827c5b9f  
28  
29  
30 31 18 Kruse M, Michelsen SI, Flachs EM, *et al.* Lifetime costs of cerebral palsy. *Developmental*  
32 *Medicine & Child Neurology* 2009;**51**:622–8. doi:10.1111/j.1469-8749.2008.03190.x  
33  
34  
35 35 19 ONS. Analysis of population estimates tool - Office for National Statistics. 2019.  
36 <https://www.ons.gov.uk/peoplepopulationandcommunity/populationandmigration/population>  
37 [estimates/datasets/analysisofpopulationestimatestool](https://www.ons.gov.uk/peoplepopulationandcommunity/populationandmigration/population) (Accessed 12 Mar 2020).  
38  
39  
40  
41 41 20 Welsh Government, Statistics for Wales. Maternity statistics, Wales 2017-18. Welsh  
42 Government 2018. <https://gov.wales/maternity-statistics-april-2017-march-2018> (Accessed 12  
43 Mar 2020).  
44  
45  
46  
47  
48  
49  
50  
51  
52  
53  
54  
55  
56  
57  
58  
59  
60

**CHEERS Checklist****Items to include when reporting economic evaluations of health interventions**

The **ISPOR CHEERS Task Force Report**, *Consolidated Health Economic Evaluation Reporting Standards (CHEERS)—Explanation and Elaboration: A Report of the ISPOR Health Economic Evaluations Publication Guidelines Good Reporting Practices Task Force*, provides examples and further discussion of the 24-item CHEERS Checklist and the CHEERS Statement. It may be accessed via the *Value in Health* or via the ISPOR Health Economic Evaluation Publication Guidelines – CHEERS: Good Reporting Practices webpage: <http://www.ispor.org/TaskForces/EconomicPubGuidelines.asp>

| Section/item                    | Item No | Recommendation                                                                                                                                                                              | Reported on page No/<br>line No |
|---------------------------------|---------|---------------------------------------------------------------------------------------------------------------------------------------------------------------------------------------------|---------------------------------|
| <b>Title and abstract</b>       |         |                                                                                                                                                                                             |                                 |
| Title                           | 1       | Identify the study as an economic evaluation or use more specific terms such as “cost-effectiveness analysis”, and describe the interventions compared.                                     | Page 1, Title                   |
| Abstract                        | 2       | Provide a structured summary of objectives, perspective, setting, methods (including study design and inputs), results (including base case and uncertainty analyses), and conclusions.     | Page 2, Abstract                |
| <b>Introduction</b>             |         |                                                                                                                                                                                             |                                 |
| Background and objectives       | 3       | Provide an explicit statement of the broader context for the study.<br>Present the study question and its relevance for health policy or practice decisions.                                | Page 5, Para 3                  |
| <b>Methods</b>                  |         |                                                                                                                                                                                             |                                 |
| Target population and subgroups | 4       | Describe characteristics of the base case population and subgroups analysed, including why they were chosen.                                                                                | Page 7, Line 1                  |
| Setting and location            | 5       | State relevant aspects of the system(s) in which the decision(s) need(s) to be made.                                                                                                        | Page 5, Para 3                  |
| Study perspective               | 6       | Describe the perspective of the study and relate this to the costs being evaluated.                                                                                                         | Page 7, Line 4                  |
| Comparators                     | 7       | Describe the interventions or strategies being compared and state why they were chosen.                                                                                                     | Page 5, Para 2&3                |
| Time horizon                    | 8       | State the time horizon(s) over which costs and consequences are being evaluated and say why appropriate.                                                                                    | Page 5, Para 3                  |
| Discount rate                   | 9       | Report the choice of discount rate(s) used for costs and outcomes and say why appropriate.                                                                                                  | Page 5, Para 3                  |
| Choice of health outcomes       | 10      | Describe what outcomes were used as the measure(s) of benefit in the evaluation and their relevance for the type of analysis performed.                                                     | Page 10, Lines 1-4              |
| Measurement of effectiveness    | 11a     | <i>Single study-based estimates</i> : Describe fully the design features of the single effectiveness study and why the single study was a sufficient source of clinical effectiveness data. |                                 |

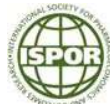

|    |                         |     |                                                                                                                                                                                                                                                                                                                                                       |
|----|-------------------------|-----|-------------------------------------------------------------------------------------------------------------------------------------------------------------------------------------------------------------------------------------------------------------------------------------------------------------------------------------------------------|
| 1  |                         |     |                                                                                                                                                                                                                                                                                                                                                       |
| 2  |                         |     |                                                                                                                                                                                                                                                                                                                                                       |
| 3  |                         |     |                                                                                                                                                                                                                                                                                                                                                       |
| 4  |                         | 11b | <i>Synthesis-based estimates:</i> Describe fully the methods used for identification of included studies and synthesis of clinical effectiveness data.                                                                                                                                                                                                |
| 5  |                         |     | Page 7, Para2                                                                                                                                                                                                                                                                                                                                         |
| 6  |                         |     | Supplementary                                                                                                                                                                                                                                                                                                                                         |
| 7  | Measurement and         | 12  | If applicable, describe the population and methods used to elicit preferences for outcomes.                                                                                                                                                                                                                                                           |
| 8  | valuation of preference |     | material                                                                                                                                                                                                                                                                                                                                              |
| 9  | based outcomes          |     |                                                                                                                                                                                                                                                                                                                                                       |
| 10 | Estimating resources    | 13a | <i>Single study-based economic evaluation:</i> Describe approaches used to estimate resource use associated with the alternative interventions. Describe primary or secondary research methods for valuing each resource item in terms of its unit cost. Describe any adjustments made to approximate to opportunity costs.                           |
| 11 | and costs               |     |                                                                                                                                                                                                                                                                                                                                                       |
| 12 |                         | 13b | <i>Model-based economic evaluation:</i> Describe approaches and data sources used to estimate resource use associated with model health states. Describe primary or secondary research methods for valuing each resource item in terms of its unit cost. Describe any adjustments made to approximate to opportunity costs.                           |
| 13 |                         |     | Page 8/9 Table                                                                                                                                                                                                                                                                                                                                        |
| 14 |                         |     | 1.                                                                                                                                                                                                                                                                                                                                                    |
| 15 |                         | 14  | Report the dates of the estimated resource quantities and unit costs. Describe methods for adjusting estimated unit costs to the year of reported costs if necessary. Describe methods for converting costs into a common currency base and the exchange rate.                                                                                        |
| 16 | Currency, price date,   |     |                                                                                                                                                                                                                                                                                                                                                       |
| 17 | and conversion          |     | Page 7 Final                                                                                                                                                                                                                                                                                                                                          |
| 18 |                         |     | paragraph                                                                                                                                                                                                                                                                                                                                             |
| 19 |                         | 15  | Describe and give reasons for the specific type of decision-analytical model used. Providing a figure to show model structure is strongly recommended.                                                                                                                                                                                                |
| 20 | Choice of model         |     |                                                                                                                                                                                                                                                                                                                                                       |
| 21 |                         |     | Page 6 Para 1                                                                                                                                                                                                                                                                                                                                         |
| 22 |                         |     | and Figure 1 &                                                                                                                                                                                                                                                                                                                                        |
| 23 |                         |     | Figure S1.                                                                                                                                                                                                                                                                                                                                            |
| 24 | Assumptions             | 16  | Describe all structural or other assumptions underpinning the decision-analytical model.                                                                                                                                                                                                                                                              |
| 25 |                         |     | Supplementary Table                                                                                                                                                                                                                                                                                                                                   |
| 26 |                         |     | S1.                                                                                                                                                                                                                                                                                                                                                   |
| 27 | Analytical methods      | 17  | Describe all analytical methods supporting the evaluation. This could include methods for dealing with skewed, missing, or censored data; extrapolation methods; methods for pooling data; approaches to validate or make adjustments (such as half cycle corrections) to a model; and methods for handling population heterogeneity and uncertainty. |
| 28 |                         |     | Sensitivity and                                                                                                                                                                                                                                                                                                                                       |
| 29 |                         |     | Scenario analysis p10.                                                                                                                                                                                                                                                                                                                                |
| 30 |                         |     |                                                                                                                                                                                                                                                                                                                                                       |
| 31 | <b>Results</b>          |     |                                                                                                                                                                                                                                                                                                                                                       |
| 32 | Study parameters        | 18  | Report the values, ranges, references, and, if used, probability distributions for all parameters. Report reasons or sources for distributions used to represent uncertainty where appropriate. Providing a table to show the input values is strongly recommended.                                                                                   |
| 33 |                         |     | Page 8/9 Table 1.                                                                                                                                                                                                                                                                                                                                     |
| 34 |                         |     |                                                                                                                                                                                                                                                                                                                                                       |
| 35 | Incremental costs and   | 19  | For each intervention, report mean values for the main categories of estimated costs and outcomes of interest, as well as mean differences between the comparator groups. If applicable, report incremental cost-effectiveness ratios.                                                                                                                |
| 36 | outcomes                |     |                                                                                                                                                                                                                                                                                                                                                       |
| 37 |                         |     | Page 8/9 Table 1.                                                                                                                                                                                                                                                                                                                                     |
| 38 |                         |     |                                                                                                                                                                                                                                                                                                                                                       |
| 39 | Characterising          | 20a | <i>Single study-based economic evaluation:</i> Describe the effects of sampling uncertainty for the estimated incremental cost and incremental effectiveness parameters, together with the impact                                                                                                                                                     |
| 40 | uncertainty             |     |                                                                                                                                                                                                                                                                                                                                                       |
| 41 |                         |     |                                                                                                                                                                                                                                                                                                                                                       |
| 42 |                         |     |                                                                                                                                                                                                                                                                                                                                                       |
| 43 |                         |     |                                                                                                                                                                                                                                                                                                                                                       |
| 44 |                         |     |                                                                                                                                                                                                                                                                                                                                                       |
| 45 |                         |     |                                                                                                                                                                                                                                                                                                                                                       |
| 46 |                         |     |                                                                                                                                                                                                                                                                                                                                                       |
| 47 |                         |     |                                                                                                                                                                                                                                                                                                                                                       |
| 48 |                         |     |                                                                                                                                                                                                                                                                                                                                                       |
| 49 |                         |     |                                                                                                                                                                                                                                                                                                                                                       |
| 50 |                         |     |                                                                                                                                                                                                                                                                                                                                                       |
| 51 |                         |     |                                                                                                                                                                                                                                                                                                                                                       |
| 52 |                         |     |                                                                                                                                                                                                                                                                                                                                                       |
| 53 |                         |     |                                                                                                                                                                                                                                                                                                                                                       |
| 54 |                         |     |                                                                                                                                                                                                                                                                                                                                                       |
| 55 |                         |     |                                                                                                                                                                                                                                                                                                                                                       |
| 56 |                         |     |                                                                                                                                                                                                                                                                                                                                                       |
| 57 |                         |     |                                                                                                                                                                                                                                                                                                                                                       |
| 58 |                         |     |                                                                                                                                                                                                                                                                                                                                                       |
| 59 |                         |     |                                                                                                                                                                                                                                                                                                                                                       |
| 60 |                         |     |                                                                                                                                                                                                                                                                                                                                                       |

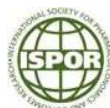



1  
2  
3  
4  
5  
6  
7  
8  
9  
10  
11  
12  
13  
14  
15  
16  
17  
18  
19  
20  
21  
22  
23  
24  
25  
26  
27  
28  
29  
30  
31  
32  
33  
34  
35  
36  
37  
38  
39  
40  
41  
42  
43  
44  
45  
46  
47  
48  
49  
50  
51  
52  
53  
54  
55  
56  
57  
58  
59  
60

|                                                                      |     |                                                                                                                                                                                                                                                                            |            |
|----------------------------------------------------------------------|-----|----------------------------------------------------------------------------------------------------------------------------------------------------------------------------------------------------------------------------------------------------------------------------|------------|
|                                                                      |     | of methodological assumptions (such as discount rate, study perspective).                                                                                                                                                                                                  |            |
|                                                                      | 20b | <i>Model-based economic evaluation</i> : Describe the effects on the results of uncertainty for all input parameters, and uncertainty related to the structure of the model and assumptions.                                                                               | Page 15.   |
| Characterising heterogeneity                                         | 21  | If applicable, report differences in costs, outcomes, or cost-effectiveness that can be explained by variations between subgroups of patients with different baseline characteristics or other observed variability in effects that are not reducible by more information. |            |
| <b>Discussion</b>                                                    |     |                                                                                                                                                                                                                                                                            |            |
| Study findings, limitations, generalisability, and current knowledge | 22  | Summarise key study findings and describe how they support the conclusions reached. Discuss limitations and the generalisability of the findings and how the findings fit with current knowledge.                                                                          | Discussion |
| <b>Other</b>                                                         |     |                                                                                                                                                                                                                                                                            |            |
| Source of funding                                                    | 23  | Describe how the study was funded and the role of the funder in the identification, design, conduct, and reporting of the analysis. Describe other non-monetary sources of support.                                                                                        | Page 20    |
| Conflicts of interest                                                | 24  | Describe any potential for conflict of interest of study contributors in accordance with journal policy. In the absence of a journal policy, we recommend authors comply with International Committee of Medical Journal Editors recommendations.                          | Page 20    |

For consistency, the CHEERS Statement checklist format is based on the format of the CONSORT statement checklist

The **ISPOR CHEERS Task Force Report** provides examples and further discussion of the 24-item CHEERS Checklist and the CHEERS Statement. It may be accessed via the *Value in Health* link or via the ISPOR Health Economic Evaluation Publication Guidelines – CHEERS: Good Reporting Practices webpage: <http://www.ispor.org/TaskForces/EconomicPubGuidelines.asp>

The citation for the CHEERS Task Force Report is:

Husereau D, Drummond M, Petrou S, et al. Consolidated health economic evaluation reporting standards (CHEERS)—Explanation and elaboration: A report of the ISPOR health economic evaluations publication guidelines good reporting practices task force. *Value Health* 2013;16:231-50.

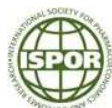

Supplement: bmjopen-2020-038505.draft_revisions.pdf [file bmjopen-2020-038505.draft_revisions.pdf]
