# Supplementary material for: Repeat screening for syphilis in pregnancy as an alternative screening strategy in the UK: a cost-effectiveness analysis
Source: PubMed Central journal article supplement — BMJ Open. 2020 Nov 19;10(11):e038505. doi: 10.1136/bmjopen-2020-038505 (PMC7678359; doi:10.1136/bmjopen-2020-038505), 2020-11-19
Supplement: bmjopen-2020-038505supp001.pdf [file bmjopen-2020-038505supp001.pdf]

## Online Supplement

### Contents

|            |                                                                                                                                                        |    |
|------------|--------------------------------------------------------------------------------------------------------------------------------------------------------|----|
| Figure S1. | Pregnancy outcomes used in the decision tree comparing universal repeat screening of syphilis in late pregnancy with single screening .....            | 3  |
| Figure S2. | Tornado diagram – one-way deterministic sensitivity analysis of total costs - parameters with least impact removed .....                               | 4  |
| Figure S3. | Tornado diagram - one-way deterministic sensitivity analysis of CS cases - parameters with least impact removed .....                                  | 5  |
| Figure S4. | Incremental cost versus additional cases of CS prevented .....                                                                                         | 6  |
| Table S1.  | Assumptions applied to screening strategies and rationale .....                                                                                        | 7  |
| Table S2.  | Pregnancy outcomes - parameter inputs for decision tree comparing universal repeat screening of syphilis in late pregnancy with single screening ..... | 8  |
| Table S3.  | Pregnancy outcome data taken from published large meta-analysis of international studies [2] .....                                                     | 10 |
| Table S4.  | Comparing the risk of adverse pregnancy outcomes in meta-analysis with risk observed in the UK in order to scale meta-analysis data .....              | 12 |
| Table S5.  | Pregnancy outcome data used in the model – adjusted from published large meta-analysis of international studies [2] to reflect UK risks.....           | 13 |
| Table S6.  | Overall number of women screened for syphilis in pregnancy, 2017/18 .....                                                                              | 14 |
| Table S7.  | Gestational week at first antenatal care attendance – by UK country .....                                                                              | 15 |
| Table S8.  | Calculating the cost per antenatal syphilis screen .....                                                                                               | 16 |
| Table S9.  | Calculating the cost of treatment and management of women diagnosed with syphilis in pregnancy .....                                                   | 18 |
| Table S10. | Gestational week at delivery (used for calculating delivery costs and estimating pregnancy outcomes) .....                                             | 19 |
| Table S11. | Calculating the average healthcare costs associated with a neonatal death.....                                                                         | 20 |
| Table S12. | Calculating the cost of testing for syphilis in neonates with clinical signs of congenital syphilis (CS) .....                                         | 21 |
| Table S13. | Calculating the cost of treating neonates with congenital syphilis (CS).....                                                                           | 23 |

|            |                                                                                                                                                                                                            |    |
|------------|------------------------------------------------------------------------------------------------------------------------------------------------------------------------------------------------------------|----|
| Table S14. | Calculating the cost of neonate screening in infants born to mothers treated for syphilis in pregnancy.....                                                                                                | 24 |
| Table S15. | Long-term health care and social care costs associated with congenital syphilis (CS) – results of the model comparing universal repeat screening of syphilis in late pregnancy with single screening ..... | 25 |
| Table S16. | Clinical outcomes for Scenario 3 (0.00012 probability of syphilis infection in pregnancy) .....                                                                                                            | 26 |
| Table S17. | Cost outcomes for Scenario 3 (0.00012 probability of syphilis infection in pregnancy) .....                                                                                                                | 26 |
| Table S18. | Requirements to prevent one outcome for Scenario 3 (0.00012 probability of syphilis infection in pregnancy) .....                                                                                          | 26 |
| Table S19. | Short and long-term cost outcomes for Scenario 3 (higher syphilis incidence in pregnancy) .....                                                                                                            | 27 |
| Table S20. | Cost per screen needed to meet NICE ICER thresholds (Scenario 7) .....                                                                                                                                     | 29 |
| References | .....                                                                                                                                                                                                      | 30 |

**Figure S1. Pregnancy outcomes used in the decision tree comparing universal repeat screening of syphilis in late pregnancy with single screening**

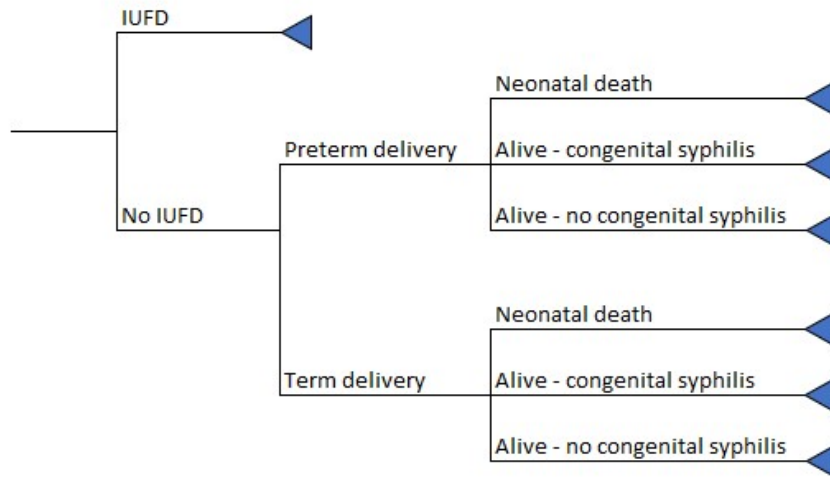

Footnote:

IUFD, intrauterine fetal demise; preterm refers to <37 weeks gestation. The blue triangle indicates the branch end point.

This diagram complements **Figure 1** in the main body of the paper. The probability of each of these outcomes occurring for each branch of the tree is presented in **Table S2**.

**Figure S2. Tornado diagram – one-way deterministic sensitivity analysis of total costs - parameters with least impact removed**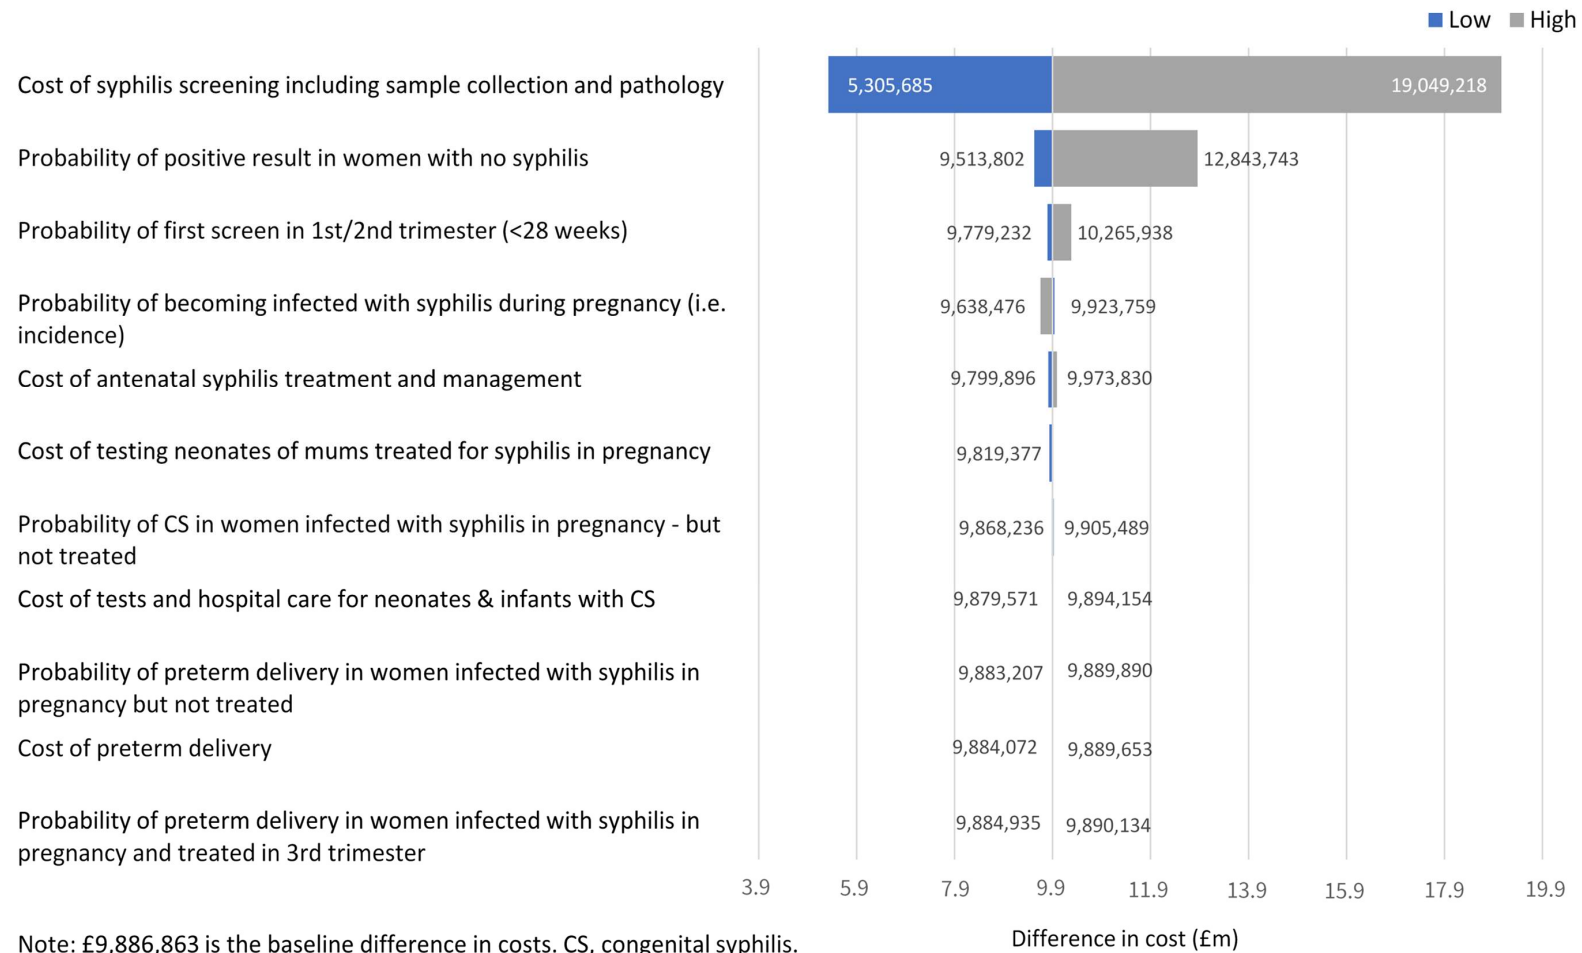

**Figure S3. Tornado diagram - one-way deterministic sensitivity analysis of CS cases - parameters with least impact removed**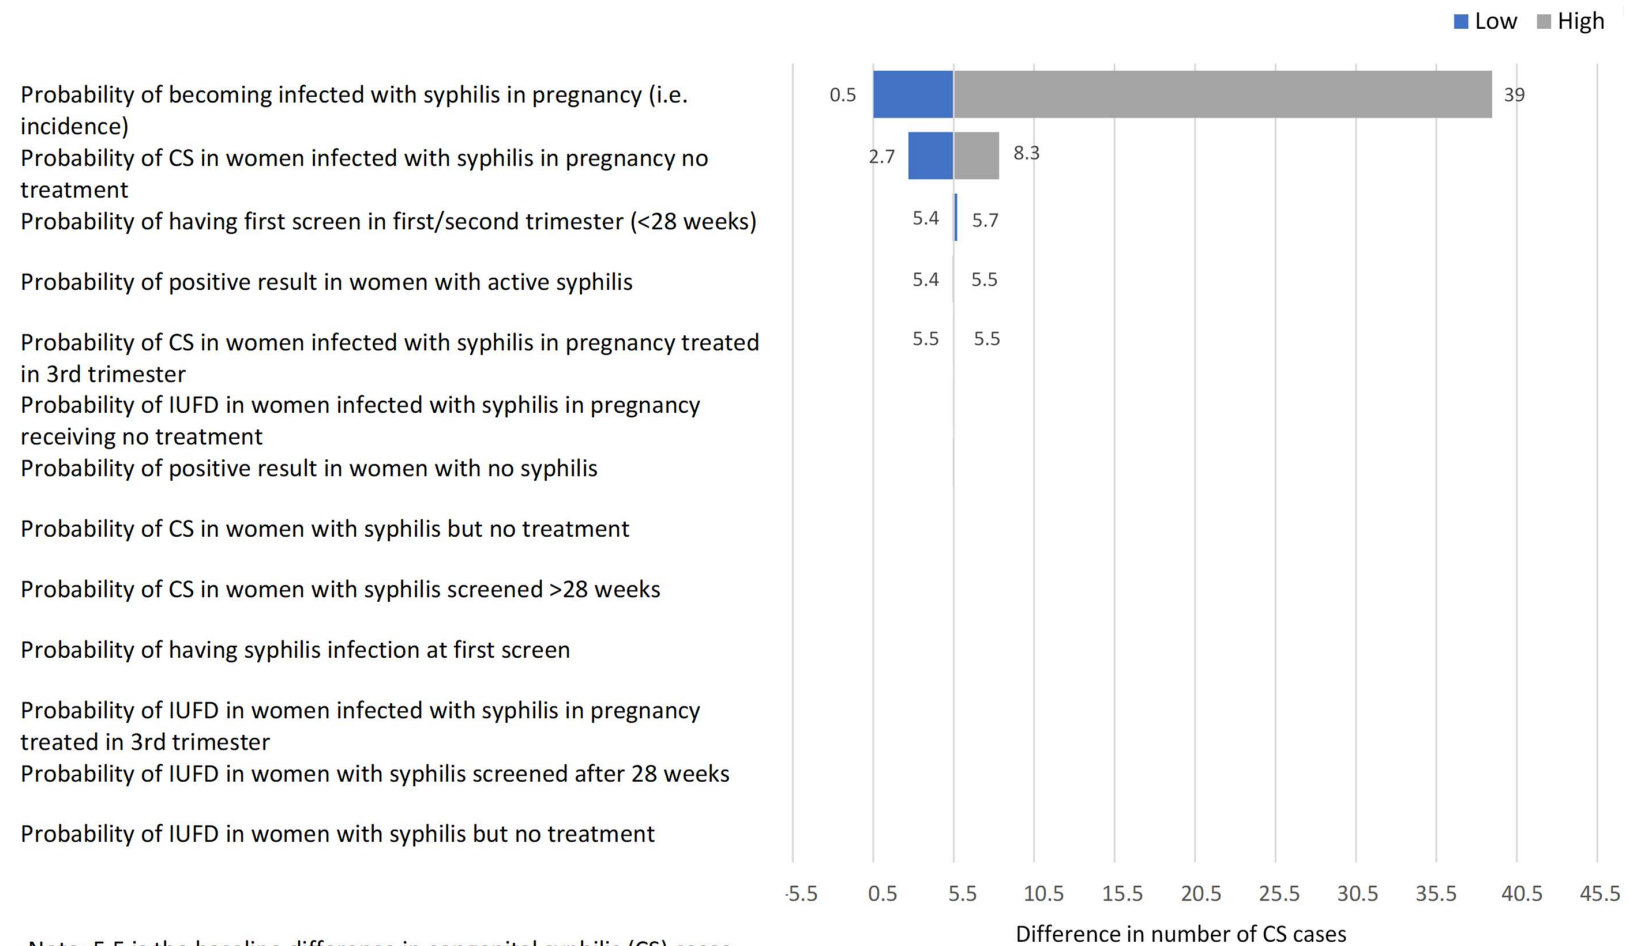

**Figure S4. Incremental cost versus additional cases of CS prevented**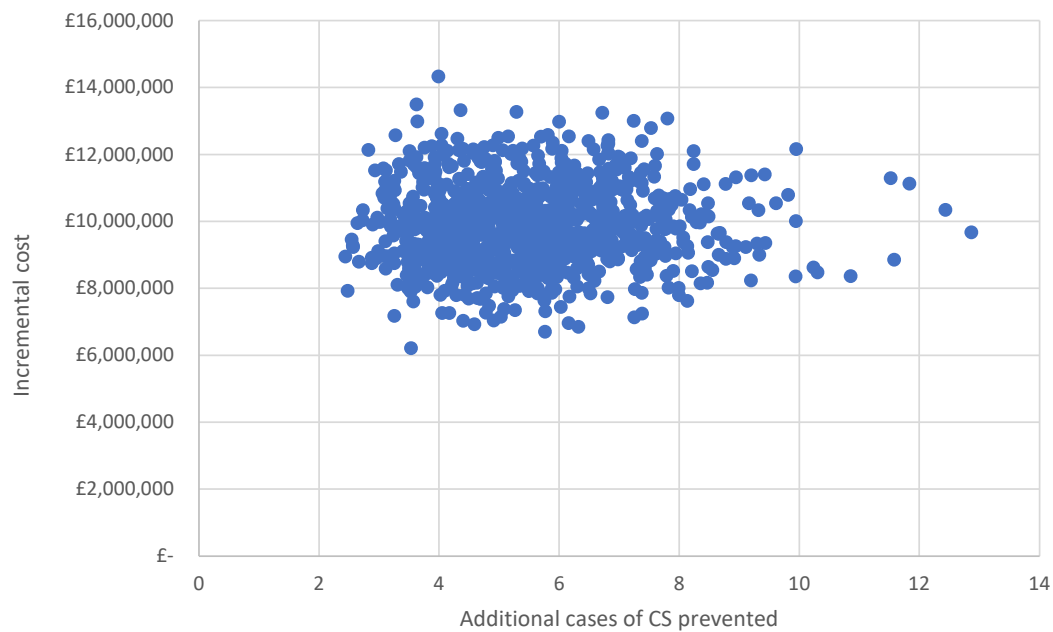

This figure is an output from the Probabilistic Sensitivity Analysis (PSA) and shows the impact of parameter uncertainty on the cost per additional case of CS prevented in universal repeat screening of syphilis in late pregnancy versus single screening.

**Table S1. Assumptions applied to screening strategies and rationale**

| <b>Assumption</b>                                                                                                                                                                                                            | <b>Note</b>                                                                                                                                                                                                                             |
|------------------------------------------------------------------------------------------------------------------------------------------------------------------------------------------------------------------------------|-----------------------------------------------------------------------------------------------------------------------------------------------------------------------------------------------------------------------------------------|
| All women found positive for syphilis, at their first or repeat screen, are referred to care within a sexual health clinic and are successfully treated within that setting.                                                 | As per clinical guidelines [1]. Uptake of treatment in diagnosed women is thought to be high. No published data were found to support or refute this assumption.                                                                        |
| The clinical management of women who are diagnosed with syphilis at their first screen includes repeat testing of syphilis and as such they do not receive a repeat screen as part of the IDPS in either screening strategy. | Recommendation from experts. This is hypothetical, as repeat screening is not current practice.                                                                                                                                         |
| Infants born with CS display signs of CS, 40% at birth and 60% some weeks/months after delivery and are tested and treated accordingly.                                                                                      | Based on expert opinion and evidence indicating that most infants with CS develop signs by 5 weeks. Lack of data on the proportion of CS cases with late presentation (after two years) [1].                                            |
| There is no loss to follow-up, i.e. all women who are identified as needing treatment receive it.                                                                                                                            | Inclusion of loss to follow-up in the model would add unnecessary complexity to the model. Also, there is lack of data on loss to follow-up in this setting.                                                                            |
| There is 100% uptake of repeat screening in women who were initially screened.                                                                                                                                               | Assessed in Scenario Analysis 2.                                                                                                                                                                                                        |
| The model inputs are not correlated.                                                                                                                                                                                         | To avoid over complexity in the model and due to lack of evidence around correlation.                                                                                                                                                   |
| Pregnant women who attend first antenatal care late receive their first screen at that point and therefore miss the opportunity for a repeat test.                                                                           | Recommendation from experts. This is hypothetical, as repeat screening is not current practice.                                                                                                                                         |
| Preterm vs. term delivery impacts costs but the model assumes it has no impact on the risk of pregnancy outcomes (neonatal death or congenital syphilis).                                                                    | Lack of data around correlation between timing of delivery and pregnancy outcome.                                                                                                                                                       |
| The repeat screen would be performed at 28 weeks gestation to coincide with existing routine anaemia blood tests. It was assumed that no new syphilis infection could occur between this screen and delivery.                | No data could be found on the incidence of syphilis or the impact of a new syphilis infection that late in pregnancy. Timing of repeat screen based on expert advice – and is hypothetical as repeat screening is not current practice. |
| No women undergo a repeat screen in the current care pathway (i.e. the single screening strategy).                                                                                                                           | Following expert advice that few high-risk women receive repeat screening at present. Lack of data around uptake of repeat screening and pregnancy outcomes for low risk vs. high risk women.                                           |

**Table S2. Pregnancy outcomes - parameter inputs for decision tree comparing universal repeat screening of syphilis in late pregnancy with single screening**

| Parameter                                                                                                 | Baseline value     | Low   | High  | Note                                                                                                          |
|-----------------------------------------------------------------------------------------------------------|--------------------|-------|-------|---------------------------------------------------------------------------------------------------------------|
| Pregnant women with no syphilis                                                                           |                    |       |       |                                                                                                               |
| IUFD                                                                                                      | 0.004              | 0.003 | 0.005 | Tables S3-S5                                                                                                  |
| Preterm delivery                                                                                          | 0.075              | 0.058 | 0.097 | Tables S3-S5                                                                                                  |
| Neonatal death                                                                                            | 0.002              | 0.001 | 0.003 | Tables S3-S5                                                                                                  |
| Congenital syphilis                                                                                       | 0.000              | -     | -     | Assumption                                                                                                    |
| Pregnant women with syphilis diagnosed and treated <28 weeks                                              |                    |       |       |                                                                                                               |
| IUFD                                                                                                      | 0.005              | 0.002 | 0.012 | Tables S3-S5                                                                                                  |
| Preterm delivery                                                                                          | 0.079              | 0.042 | 0.143 | Tables S3-S5                                                                                                  |
| Neonatal death                                                                                            | 0.003              | 0.001 | 0.014 | Tables S3-S5                                                                                                  |
| Congenital syphilis                                                                                       | 0.011              | 0.008 | 0.016 | Tables S3-S5                                                                                                  |
| Pregnant women with syphilis diagnosed and treated ≥28 weeks                                              |                    |       |       |                                                                                                               |
| IUFD                                                                                                      | 0.023              | 0.018 | 0.028 | Tables S3-S5                                                                                                  |
| Preterm delivery                                                                                          | 0.183              | 0.119 | 0.275 | Tables S3-S5                                                                                                  |
| Neonatal death                                                                                            | 0.013              | 0.005 | 0.032 | Tables S3-S5                                                                                                  |
| Congenital syphilis                                                                                       | 0.038 <sup>1</sup> | 0.029 | 0.047 | Tables S3-S5                                                                                                  |
| Pregnant women with syphilis not diagnosed or treated                                                     |                    |       |       |                                                                                                               |
| IUFD                                                                                                      | 0.028              | 0.023 | 0.033 | Tables S3-S5                                                                                                  |
| Preterm delivery                                                                                          | 0.241              | 0.188 | 0.305 | Tables S3-S5                                                                                                  |
| Neonatal death                                                                                            | 0.014              | 0.009 | 0.022 | Tables S3-S5                                                                                                  |
| Congenital syphilis                                                                                       | 0.034 <sup>1</sup> | 0.026 | 0.042 | Tables S3-S5                                                                                                  |
| Pregnant women infected with syphilis in pregnancy and diagnosed and treated in 3 <sup>rd</sup> trimester |                    |       |       |                                                                                                               |
| IUFD                                                                                                      | 0.006              | 0.002 | 0.013 | Assumed to have same risk as women diagnosed and treated for syphilis infection in 1 <sup>st</sup> trimester. |
| Preterm delivery                                                                                          | 0.071              | 0.038 | 0.127 |                                                                                                               |
| Neonatal death                                                                                            | 0.003              | 0.001 | 0.015 |                                                                                                               |
| Congenital syphilis                                                                                       | 0.010              | 0.007 | 0.014 |                                                                                                               |
| Pregnant women infected with syphilis during pregnancy not diagnosed or treated                           |                    |       |       |                                                                                                               |
| IUFD                                                                                                      | 0.028              | 0.023 | 0.033 | Assumed to have same risk as women with syphilis not diagnosed or treated. Estimate based on expert opinion.  |
| Preterm delivery                                                                                          | 0.241              | 0.188 | 0.305 |                                                                                                               |
| Neonatal death                                                                                            | 0.014              | 0.009 | 0.022 |                                                                                                               |
| Congenital syphilis                                                                                       | 0.500              | 0.250 | 0.750 |                                                                                                               |

IUFD, intrauterine foetal demise. Low and high values are based on the 95% confidence intervals (CIs) from the meta-analysis Qin *et al.* [2] adjusted to the UK setting in the same way as the baseline values (See **Tables S3-S5**).

<sup>1</sup>The probability of congenital syphilis in women with syphilis is higher in women treated at ≥28 weeks gestation than in women receiving no treatment. This is because estimates are from a meta-



analysis which combined data from 15 and 33 studies respectively to estimate risk and both estimates have wide, overlapping confidence intervals.

**Table S3. Pregnancy outcome data taken from published large meta-analysis of international studies [2]**

| Pregnancy outcome   | Women with no syphilis | Syphilis infection at time of conception                   |                                                            |                                                              |                                                            | New syphilis infection during pregnancy |                                                             |                   |
|---------------------|------------------------|------------------------------------------------------------|------------------------------------------------------------|--------------------------------------------------------------|------------------------------------------------------------|-----------------------------------------|-------------------------------------------------------------|-------------------|
|                     |                        | a<br>First screen + treatment<br>1 <sup>st</sup> trimester | b<br>First screen + treatment<br>2 <sup>nd</sup> trimester | c<br>First screen + treatment<br>1/2 <sup>nd</sup> trimester | d<br>First screen + treatment<br>3 <sup>rd</sup> trimester | e<br>No treatment                       | f<br>Repeat screen + treatment<br>3 <sup>rd</sup> trimester | g<br>No treatment |
| Congenital syphilis | 0.0%                   | 10.4%                                                      | 17.6%                                                      | 12.1%                                                        | 40.6%                                                      | 36.0%                                   | 10.4%                                                       | 50%               |
| Preterm delivery    | 7.2%                   | 6.8%                                                       | 10.1%                                                      | 7.6%                                                         | 17.6%                                                      | 23.2%                                   | 6.8%                                                        | 23.2%             |
| IUFD (stillbirth)   | 3.7%                   | 5.3%                                                       | 4.2%                                                       | 5.0%                                                         | 21.3%                                                      | 26.4%                                   | 5.3%                                                        | 26.4%             |
| Neonatal death      | 2.0%                   | 3.8%                                                       | 3.0%                                                       | 3.6%                                                         | 15.1%                                                      | 16.2%                                   | 3.8%                                                        | 16.2%             |

These data are from a systematic review and meta-analysis which measured pregnancy outcomes in women with and without syphilis (Qin *et al.* [2]). Each estimate is an average calculated by combining data from 2-33 different studies.

The risk of neonatal death was reported for the whole of pregnancy but was not calculated separately for treatment in each pregnancy trimester. For the model, the risk of intrauterine fetal demise (IUFD) in each trimester compared to the overall risk in pregnancy was used to estimate the risk of neonatal death in each trimester compared to the overall risk in pregnancy.

Column c, the risk of pregnancy outcomes if syphilis is diagnosed and treated in the 1<sup>st</sup> or 2<sup>nd</sup> trimester, was calculated using data from the 1<sup>st</sup> and 2<sup>nd</sup> trimesters (column a and b) and using UK data to calculate the proportion of women first attending antenatal care in their 1<sup>st</sup> or 2<sup>nd</sup> trimester (75.9% and 24.1% respectively). For example, the risk of congenital syphilis (CS) was calculated as follows:  $(0.759 \times 0.104) + (0.241 \times 0.176) = 0.121$ .

Column e: no treatment group due to a false negative test result. The probability of CS in women with syphilis is higher in women treated in 3<sup>rd</sup> trimester (column d) than in women receiving no treatment (column e). This is because estimates are from a meta-analysis which combined data from 15 and 33 studies respectively to estimate risk and both estimates have wide, overlapping confidence intervals.

Column f: women infected with syphilis during pregnancy but diagnosed and treated at their repeat screen (in third trimester) are assumed to have the same risk of adverse pregnancy outcomes as women who are diagnosed and treated in their first pregnancy trimester (column a) (from expert opinion).

Column g: the risk of preterm delivery, IUFD and neonatal death is assumed to be the same as for women who have syphilis at conception but who are not treated in pregnancy (column e). However, the risk of CS is estimated as 50%, since the risk is known to be high in primary infection (from expert opinion).

The risk of adverse pregnancy outcomes in women with no syphilis in the meta-analysis data (Qin *et al*) [2] were considerably higher than the numbers seen in pregnant women in the UK. The risk of CS in women with syphilis was also considerably higher in the meta-analysis results than seen in the UK [3,4].

Therefore, these inputs were adjusted to the UK settings (See **Table S4**).

**Table S4. Comparing the risk of adverse pregnancy outcomes in meta-analysis with risk observed in the UK in order to scale meta-analysis data**

| Pregnancy outcome                   | Meta-analysis data [2] | UK data [n/N]                   | UK vs. meta-analysis | UK data reference |
|-------------------------------------|------------------------|---------------------------------|----------------------|-------------------|
|                                     | A                      | B                               | C                    |                   |
| <b>Women with no syphilis</b>       |                        |                                 |                      |                   |
| Preterm delivery                    | 7.2%                   | 7.485% [57,079/762,594]         | 104.0%               | <b>Table S10</b>  |
| IUFD (stillbirth)                   | 3.7%                   | 0.393% [3.93/1000] <sup>1</sup> | 10.6%                | [5]               |
| Neonatal death                      | 2.0%                   | 0.172% [1.72/1000] <sup>1</sup> | 8.6%                 | [5]               |
| <b>Women with syphilis</b>          |                        |                                 |                      |                   |
| Congenital syphilis (any trimester) | 13.7%                  | 1.28% [3.4/266] <sup>2</sup>    | 9.4%                 | [3,4]             |

<sup>1</sup>The most recent data on pregnancy outcomes from the UK were from 2016 when the total number of pregnancies in the UK was 780,043 [5]. Pregnancy outcomes reported from the UK as a whole are used for the no syphilis group.

<sup>2</sup>Based on the numbers in our model, we would expect at total of 266 women in 2017/18 to have syphilis in pregnancy i.e. 254 women at the start of pregnancy [0.00035\*725,891] plus 12 women infected during pregnancy [0.000017\*725,637].

No data on the risk of the different pregnancy outcomes during each trimester were available from the UK. Therefore, the difference in overall risk in pregnancy between the UK and the metanalysis data was used to adjust data from the meta-analysis to calculate the risk of outcomes in each trimester for women in the UK. The calculated risks, used in the model, are presented in **Table S5** and an example of how they were calculated is included in the **Table S5** footnotes.

**Table S5. Pregnancy outcome data used in the model – adjusted from published large meta-analysis of international studies [2] to reflect UK risks**

| Pregnancy outcome   | Women with no syphilis | Syphilis infection at time of conception           |                                                    |                                                      |                                                    | Becomes infected during pregnancy |                                                     |              |
|---------------------|------------------------|----------------------------------------------------|----------------------------------------------------|------------------------------------------------------|----------------------------------------------------|-----------------------------------|-----------------------------------------------------|--------------|
|                     |                        | First screen + treatment 1 <sup>st</sup> trimester | First screen + treatment 2 <sup>nd</sup> trimester | First screen + treatment 1/2 <sup>nd</sup> trimester | First screen + treatment 3 <sup>rd</sup> trimester | No treatment                      | Repeat screen + treatment 3 <sup>rd</sup> trimester | No treatment |
| Congenital syphilis | 0.0%                   | 0.97%                                              | 1.65%                                              | 1.14%                                                | 3.80%                                              | 3.37%                             | 0.97%                                               | 50.0%        |
| Preterm delivery    | 7.48%                  | 7.07%                                              | 10.50%                                             | 7.90%                                                | 18.03%                                             | 24.12%                            | 7.07%                                               | 24.12%       |
| IUFD (stillbirth)   | 0.39%                  | 0.56%                                              | 0.45%                                              | 0.53%                                                | 2.26%                                              | 2.80%                             | 0.56%                                               | 2.80%        |
| Neonatal death      | 0.17%                  | 0.32%                                              | 0.26%                                              | 0.31%                                                | 1.30%                                              | 1.39%                             | 0.32%                                               | 1.39%        |

These numbers were calculated using data from a meta-analysis (**Table S3**) adjusted by the difference in the (overall) risk of pregnancy outcomes between the UK and the meta-analysis (**Table S4**, column C).

For example, the risk of congenital syphilis (CS) in women treated for syphilis in the 1<sup>st</sup>/2<sup>nd</sup> trimester (1.14%) was calculated as follows:  $(0.121 \times 0.094) = 0.0114$  i.e. the risk of CS in the 1<sup>st</sup>/2<sup>nd</sup> trimester from the meta-analysis (**Table S3**, column C) multiplied by the proportional in of risk of CS in pregnancy in the UK vs. the meta-analysis (**Table S4**, column C).

The published 95% confidence intervals were adjusted in the same way to calculate the low and high values used in the sensitivity analysis.

**Table S6. Overall number of women screened for syphilis in pregnancy, 2017/18**

| Country          | Total number of deliveries | Estimated number screened | Reference |
|------------------|----------------------------|---------------------------|-----------|
| England          | 626,203                    | 623,698                   | [36]      |
| Northern Ireland | 23,045                     | 23,038                    | [38]      |
| Scotland         | 51,197                     | 50,992                    | [39]      |
| Wales            | 28,361                     | 28,248                    | [40]      |
| UK total         | 728,806                    | 725,976                   |           |

In England, Wales and Scotland, these data exclude women giving birth at home or in non-NHS hospitals.

Screening uptake in 2017/2018 for England, Wales and Scotland was estimated as 99.6% i.e. the same as uptake in England in 2016/2017 [15].

The uptake of screening in 2017/2018 for Northern Ireland was 99.97%, based on data collected by Public Health Agency Northern Ireland 2017/2018.

**Table S7. Gestational week at first antenatal care attendance – by UK country**

| UK country       | <12 weeks |       | 12-28 weeks |       | ≥28 weeks |      | No data  | With data available | Total  | Reference |
|------------------|-----------|-------|-------------|-------|-----------|------|----------|---------------------|--------|-----------|
|                  | n         | %     | n           | %     | n         | %    |          |                     |        |           |
| England          | 299,634   | 70.1% | 103,137     | 24.1% | 24,935    | 5.8% | ~200,000 | 427,706             | -      | [6]       |
| Northern Ireland | 15,069    | 65.4% | 7,607       | 33.0% | 365       | 1.6% | 4        | 23,041              | 23,045 | [7]       |
| Scotland         | 42,840    | 84.2% | 5,876       | 11.5% | 2,165     | 4.3% | 316      | 50,881              | 51,197 | [8]       |
| Wales            | 22,878    | 82.2% | 4,226       | 15.2% | 745       | 2.7% | 512      | 27,849              | 28,361 | [9]       |
| UK total         | 380,421   | 71.8% | 120,846     | 22.8% | 28,210    | 5.3% |          | 529,477             |        |           |

All data are for year 2017/18. The SASS study [3] found that in women screening positive for syphilis, 6.4% (81/1271) had their first antenatal attendance at 27 weeks or later. These data were used to calculate pregnancy outcomes and the percentage of women receiving a first syphilis screen before 28 weeks gestation (94.7% i.e. 501,267/529,477).

Table S8. Calculating the cost per antenatal syphilis screen

| Activity                           | Cost per item (£) | Proportion with cost | Average cost/person (£) | Notes                                                                                                                                                                                                                                                                                                                                                                                            |
|------------------------------------|-------------------|----------------------|-------------------------|--------------------------------------------------------------------------------------------------------------------------------------------------------------------------------------------------------------------------------------------------------------------------------------------------------------------------------------------------------------------------------------------------|
| Blood sample collection            | 0.23              | 1.00                 | 0.23                    | Includes only equipment costs. Syphilis screening is performed at the same time as other antenatal screening tests – and therefore does not incur additional staff time.                                                                                                                                                                                                                         |
| Laboratory testing (higher cost)   | 16.50             | 0.50                 | 8.25                    | Price quoted in London Sexual Health full STI screen tariff [10].                                                                                                                                                                                                                                                                                                                                |
| Laboratory testing (lower cost)    | 9.00              | 0.50                 | 4.50                    | Price quoted by laboratory manager in Leeds. This is the price charged per screen. It covers consumables, internal quality control (IQC), external quality assessment (EQA), laboratory staff time, and overheads. It accounts for the ratio of negative (which require only one test), positive (which require confirmatory work) test results.                                                 |
| Input from multi-disciplinary team | 37.50             | 0.002                | 0.08                    | Estimate 1/500 women require 30 minutes input from the MDT based on expert opinion.                                                                                                                                                                                                                                                                                                              |
| Reference laboratory testing       | 40.00             | 0.003                | 0.10                    | Estimate 1/400 samples sent to reference laboratory for confirmatory testing based on England's central reference lab receiving ~1300 samples/year (personal communication with laboratory manager).                                                                                                                                                                                             |
| Repeat test blood collection       | 3.86              | 0.01                 | 0.04                    | 1/100 women require a repeat test due to inconclusive test results. This cost is taken from London Sexual Health full STI screen tariff [10].                                                                                                                                                                                                                                                    |
| Laboratory testing (higher cost)   | 16.50             | 0.005                | 0.08                    | Repeat test due to inconclusive test result from first assay.                                                                                                                                                                                                                                                                                                                                    |
| Laboratory testing (lower cost)    | 9.00              | 0.005                | 0.05                    | Repeat test due to inconclusive test result from first assay.                                                                                                                                                                                                                                                                                                                                    |
| Referral to sexual health clinic   | 56.60             | 0.0006               | 0.04                    | Women with positive result for antibodies are referred to Sexual Health Clinic for sexual history and risk assessment. Cost based on a 30-minute appointment with a consultant plus 5 mins of receptionist time (staff costs taken from PSSRU 2017/18 [11]). Proportion taken from SASS study [3] which found 607/961,494 women had positive antibody result but did not then require treatment. |
| <b>Total</b>                       |                   |                      | <b>13.36</b>            |                                                                                                                                                                                                                                                                                                                                                                                                  |



Footnote: A 50:50 split between the higher and lower costs for laboratory tests was used. The cost of a repeat screen was assumed to be the same as the cost of a first screen since in both cases, samples would be taken at a routine antenatal appointment when other blood tests are performed, i.e. HIV and hepatitis B screening at first screen and routine anaemia blood tests at 28 weeks gestation.

**Table S9. Calculating the cost of treatment and management of women diagnosed with syphilis in pregnancy**

| <b>Activity</b>                                                 | <b>Cost per woman (£)</b> | <b>Notes</b>                                                                                                                                                                                                                                                                                                                                                                                                                                                 |
|-----------------------------------------------------------------|---------------------------|--------------------------------------------------------------------------------------------------------------------------------------------------------------------------------------------------------------------------------------------------------------------------------------------------------------------------------------------------------------------------------------------------------------------------------------------------------------|
| STI Intervention C - Management of reactive treponemal serology | 262.34                    | Cost taken from the London Integrated Sexual Health Tariff 2017/18 which includes 5 visits to clinic for treatment with penicillin regimen appropriate for the stage of infection [1,10].<br>In pregnant women diagnosed in the first trimester, all 5 visits would occur before delivery, in women diagnosed in final trimester, 3/5 visits would occur before delivery and 2 after delivery (personal communication with senior sexual health consultant). |
| Additional cost at 1 <sup>st</sup> visit                        | 16.50                     | Additional cost due to patient being seen by consultant doctor instead of by doctor/nurse mix [11].                                                                                                                                                                                                                                                                                                                                                          |
| Additional cost at 2 <sup>nd</sup> visit                        | 8.25                      | Additional cost due to patient being seen by consultant doctor instead of by doctor/nurse mix [11].                                                                                                                                                                                                                                                                                                                                                          |
| Additional cost at 5 <sup>th</sup> visit                        | 27.00                     | Additional cost due to patient being seen by consultant doctor instead of by doctor/nurse mix [11].                                                                                                                                                                                                                                                                                                                                                          |
| <b>Total</b>                                                    | <b>314.09</b>             |                                                                                                                                                                                                                                                                                                                                                                                                                                                              |

There would be no change to the staff grade (from the tariff) at the 3<sup>rd</sup> or 4<sup>th</sup> visit, when the patient would be seen by a nurse.

This cost was calculated based on expert opinion from a senior consultant in sexual health.

Table S10. Gestational week at delivery (used for calculating delivery costs and estimating pregnancy outcomes)

| Country          | ≤33 weeks |      | 34-36 weeks |      | >36 weeks |       | No data | With data available | Total  | Ref  | Notes        |
|------------------|-----------|------|-------------|------|-----------|-------|---------|---------------------|--------|------|--------------|
|                  | n         | %    | n           | %    | n         | %     |         |                     |        |      |              |
| England          | 13,846    | 2.1% | 35,533      | 5.4% | 607,972   | 92.5% |         | 657,351             | -      | [19] | 2014 data    |
| Northern Ireland | 470       | 2.0% | 1,385       | 6.0% | 21,190    | 92.0% | 0       | 23,045              | 23,045 | [7]  | 2017/18 data |
| Scotland         | 868       | 1.7% | 2,444       | 4.9% | 46,791    | 93.4% | 207     | 50,103              | 50,310 | [8]  | 2017/18 data |
| Wales            | 723       | 2.3% | 1,810       | 5.6% | 29,562    | 92.1% | 141     | 32,095              | 32,236 | [20] | 2017 data    |
| UK total         | 15,907    | 2.1% | 41,172      | 5.4% | 705,515   | 92.5% |         | 762,594             |        |      |              |

**Table S11. Calculating the average healthcare costs associated with a neonatal death**

| Activity          | Resource/<br>Activity | Quantity | Cost per unit | Total cost       | Ref    | Notes:                                                                                |
|-------------------|-----------------------|----------|---------------|------------------|--------|---------------------------------------------------------------------------------------|
| Cost of IUFD      | -                     | -        | -             | £4,356.80        | [12]   |                                                                                       |
| Hospital stay     | Day                   | 3        | £483.00       | £1,449.00        | [1,13] | Based on NHS tariff for Paediatric Major Infections with CC Score 0 - HRG code PW16E. |
| <b>Total cost</b> |                       |          |               | <b>£5,805.80</b> |        |                                                                                       |

The cost of neonatal death is calculated using the cost of intrauterine fetal demise (IUFD), which includes the cost of post-mortem, parental counselling and a subsequent pregnancy, plus an additional 3-days in a paediatric intensive care unit for the neonate. Three days hospital stay is an estimate based on expert opinion.

**Table S12. Calculating the cost of testing for syphilis in neonates with clinical signs of congenital syphilis (CS)**

| Activity                                                    | Number<br>At<br>birth | Number<br>After<br>birth | Resource<br>type | Resource/<br>Activity         | Quantity<br>/minutes      | Cost per<br>unit/hour<br>(£) | Cost per<br>neonate<br>(£) | Ref  | Notes                                                                        |
|-------------------------------------------------------------|-----------------------|--------------------------|------------------|-------------------------------|---------------------------|------------------------------|----------------------------|------|------------------------------------------------------------------------------|
| Clinical assessment for signs of CS                         | 1                     |                          | Staff time       | Consultant paediatrician      | 30                        | 108.00                       | 54.00                      | [11] |                                                                              |
| Review of syphilis test results                             |                       | 8                        | Staff time       | Consultant paediatrician      | 10 per review             | 108.00                       | 144.00                     | [11] |                                                                              |
| RPR/VDRL blood test                                         | 1                     | 4                        | Staff time       | Blood taken by nurse (band 6) | 10 per test               | 45.00                        | 37.50                      | [11] | Test at birth, 1, 3, 6 and 12 months.                                        |
| IgM EIA blood test                                          | 1                     | 2                        | Staff time       | Blood taken by nurse          | 10 per test               | 45.00                        | 22.50                      | [11] | Test at birth, 1 and 3 months.                                               |
| Syphilis blood tests (as above)                             | 2                     | 6                        | Diagnostics      | Laboratory tests              | 5 (3 combined + 2 single) | 12.75                        | 63.75                      |      | Same cost if both tests are performed or only RPR/VDRL blood test performed. |
| Blood tests: full blood count, liver function, electrolytes | 1                     |                          | Staff time       | Blood taken by nurse          | 10                        | 45.00                        | 7.50                       | [11] |                                                                              |
| Blood tests (as above)                                      | 1                     |                          | Diagnostics      | Laboratory tests              | 1                         | 20.00                        | 20.00                      |      | Estimate                                                                     |
| Lumbar puncture (white blood cell, protein, RPR, TPPA)      | 1                     |                          | Staff time       | Paediatric registrar          | 45                        | 43.00                        | 32.25                      | [11] |                                                                              |
| Blood tests (as above)                                      | 1                     |                          | Diagnostics      | Laboratory tests              | 1                         | 20.00                        | 20.00                      |      | Estimate                                                                     |
| X-ray of long bones                                         | 1                     |                          | Staff time       | Consultant Radiographer       | 30                        | 93.00                        | 46.50                      | [11] | Based on cost of Band 8c Radiographer                                        |

Continued over the page.

Table S12 Continued from previous page.

| Activity                                                 | Number<br>At<br>birth | Number<br>After<br>birth | Resource<br>type | Resource/<br>Activity                    | Quantity<br>/minutes | Cost per<br>unit/hour<br>(£) | Cost per<br>neonate<br>(£) | Ref  | Notes                                    |
|----------------------------------------------------------|-----------------------|--------------------------|------------------|------------------------------------------|----------------------|------------------------------|----------------------------|------|------------------------------------------|
| Chest x-ray                                              | 1                     |                          | Staff time       | Consultant<br>Radiographer               | 30                   | 93.00                        | 46.50                      | [11] | Based on cost of Band<br>8c Radiographer |
| X-ray film                                               | 1                     |                          | Diagnostics      | Diagnostic tests                         | 2                    | 25.00                        | 50.00                      | [14] |                                          |
| Ophthalmic assessment                                    | 1                     |                          | Staff time       | Consultant<br>Ophthalmologist            | 30                   | 108.00                       | 54.00                      | [11] |                                          |
| Audiology review                                         | 1                     |                          | Staff time       | Audiologist<br>(Associate<br>specialist) | 10                   | 105.00                       | 17.50                      | [11] |                                          |
| Sample taken for<br>microscopy/PCR                       | 1                     |                          | Staff time       | Nurse (band 6)                           | 10                   | 45.00                        | 7.50                       | [11] |                                          |
| Dark ground microscopy and<br>PCR for <i>T. pallidum</i> | 1                     |                          | Diagnostics      | Laboratory tests                         | 1                    | 20.00                        | 20.00                      |      | Estimate                                 |
| Results review and liaison with<br>sexual health team    | 1                     |                          | Staff time       | Consultant<br>paediatrician              | 60                   | 108.00                       | 108.00                     | [11] |                                          |
| <b>Total cost</b>                                        |                       |                          |                  |                                          |                      |                              | <b>751.50</b>              |      |                                          |

RPR/VDRL, rapid plasma reagent/venereal disease research lab test. Detailed testing protocol was obtained from Clinical Guidelines [1] and expert opinion.

**Table S13. Calculating the cost of treating neonates with congenital syphilis (CS)**

| Activity                                                                     | N  | Resource type | Resource/ Activity                 | Unit          | Cost per unit (£) | Cost per neonate (£) | Reference | Notes                                                                                 |
|------------------------------------------------------------------------------|----|---------------|------------------------------------|---------------|-------------------|----------------------|-----------|---------------------------------------------------------------------------------------|
| <b>Neonates with signs of CS at delivery (40%)</b>                           |    |               |                                    |               |                   |                      |           |                                                                                       |
| Treatment for CS                                                             | 23 | Medication    | Penicillin (dose 30mg/kg)          | 105mg dose    | 3.00              | 12.08                | [1,15,16] | Dose calculated using average birthweight of 3.5kg.                                   |
| Treatment for CS                                                             | 23 | Medication    | Glucose 5% or sodium chloride 0.9% | Infusion bag  | 2.14              | 49.22                | [1,15,16] | Standard sized infusion bags are used with the surplus discarded.                     |
| Hospital stay                                                                | 10 | Tariff cost   | Hospital stay                      | Days          | 721.00            | 7,210.00             | [1,13,17] | Based on NHS tariff for Neonatal Diagnoses with CC Score 0 - HRG code PB04D.          |
| <b>Neonates with signs of CS days/weeks after delivery (60%)</b>             |    |               |                                    |               |                   |                      |           |                                                                                       |
| Treatment for CS                                                             | 30 | Medication    | Penicillin (dose 30mg/kg)          | 123.75mg dose | 3.00              | 18.56                | [1,15,16] | Dose calculated using average weight at 1 month of 4.125kg.                           |
| Treatment for CS                                                             | 30 | Medication    | Glucose 5% or sodium chloride 0.9% | Infusion bag  | 2.14              | 64.20                | [1,15,16] | Standard sized infusion bags are used with the surplus discarded.                     |
| Hospital stay                                                                | 10 | Tariff cost   | Hospital stay                      | Days          | 483.00            | 4,830.00             | [1,13,17] | Based on NHS tariff for Paediatric Major Infections with CC Score 0 - HRG code PW16E. |
| <b>Total cost of treating neonates with CS (based on 40%/60% split)</b>      |    |               |                                    |               |                   | 5,856.18             |           |                                                                                       |
| <b>Total cost of testing and treating neonates with clinical signs of CS</b> |    |               |                                    |               |                   | 6,607.68             |           |                                                                                       |

CS, congenital syphilis. Clinical guidelines recommend that treatment is given every 12 hours (for infants  $\leq 7$  days of age) and every 8 hours (for infants  $> 7$  days of age) for a total of 10 days with treatment typically starting on the day of delivery.

**Table S14. Calculating the cost of neonate screening in infants born to mothers treated for syphilis in pregnancy**

| Activity                            | Number   |             | Resource type | Resource/ Activity       | Quantity/ minutes | Cost per unit/hour (£) | Cost per neonate (£) | Ref  | Notes                                                                                                           |
|-------------------------------------|----------|-------------|---------------|--------------------------|-------------------|------------------------|----------------------|------|-----------------------------------------------------------------------------------------------------------------|
|                                     | At birth | After birth |               |                          |                   |                        |                      |      |                                                                                                                 |
| Clinical assessment for signs of CS | 1        |             | Staff time    | Consultant paediatrician | 30                | 108.00                 | 54.00                | [11] |                                                                                                                 |
| Review of test results              |          | 6           | Staff time    | Consultant paediatrician | 10 per review     | 108.00                 | 108.00               | [11] |                                                                                                                 |
| RPR/VDRL blood test                 | 1        | 2           | Staff time    | Blood taken by nurse     | 10 per test       | 45.00                  | 22.50                | [11] | Tests every three months until RPR is negative (this usually occurs by six months). Cost based on band 6 nurse. |
| IgM EIA blood test                  | 1        | 2           | Staff time    | Blood taken by nurse     | 10 per test       | 45.00                  | 22.50                | [11] |                                                                                                                 |
| Syphilis blood tests (as above)     | 2        | 4           | Diagnostics   | Laboratory tests         | 3 sets of tests   | 12.75                  | 38.25                | [10] | Based on average combined cost for tests.                                                                       |
| <b>Total cost</b>                   |          |             |               |                          |                   |                        | <b>£245.25</b>       |      |                                                                                                                 |

CS, congenital syphilis; IgM EIA, immunoglobulin M enzyme immunoassay; RPR/VDRL, rapid plasma reagent/venereal disease research lab test.



**Table S15. Long-term health care and social care costs associated with congenital syphilis (CS) – results of the model comparing universal repeat screening of syphilis in late pregnancy with single screening**

|                                         | Short-term costs<br>[Antenatal +<br>postnatal] | Long-term<br>costs <sup>1</sup> | Lifetime costs<br>[short + long-<br>term] | Total QALYs |
|-----------------------------------------|------------------------------------------------|---------------------------------|-------------------------------------------|-------------|
| Single screen                           | £1,777,469,008                                 | £5,754,176                      | £1,783,223,184                            | 19,464,817  |
| Universal repeat screen                 | £1,787,355,870                                 | £2,160,086                      | £1,789,515,957                            | 19,464,869  |
| Difference                              | £9,886,863                                     | -£3,594,090                     | £6,292,773                                | 52.2        |
| ICER                                    |                                                |                                 |                                           | £120,494    |
| <b>DSA: No discounting of utilities</b> |                                                |                                 |                                           |             |
| Single screen                           | £1,777,469,008                                 | £5,754,176                      | £1,783,223,184                            | 58,444,492  |
| Universal repeat screen                 | £1,787,355,870                                 | £2,160,086                      | £1,789,515,957                            | 58,444,684  |
| Difference                              | £9,886,863                                     | -£3,594,090                     | £6,292,773                                | 192.3       |
| ICER                                    |                                                |                                 |                                           | £32,716     |
| <b>DSA: 6% discounting of utilities</b> |                                                |                                 |                                           |             |
| Single screen                           | £1,777,469,008                                 | £5,754,176                      | £1,783,223,184                            | 11,948,666  |
| Universal repeat screen                 | £1,787,355,870                                 | £2,160,086                      | £1,789,515,957                            | 11,948,686  |
| Difference                              | £9,886,863                                     | -£3,594,090                     | £6,292,773                                | 30.6        |
| ICER                                    |                                                |                                 |                                           | £205,600    |

DSA, deterministic sensitivity analysis; ICER, Incremental cost-effectiveness ratio. Lifetime costs and utilities were discounted at 3.5% unless otherwise stated. Data presented are for all women screened for syphilis in one year (n=725,891).

<sup>1</sup>Additional lifetime health and social care costs for individuals born with CS (£651,387 per individual) - adapted from a study of lifetime costs of cerebral palsy in Denmark [18]. The social care costs include specialised schooling, and after school care, support to parents, residential institutions, supervised workshops, day centre, and other adult support services.

**Table S16. Clinical outcomes for Scenario 3 (0.00012 probability of syphilis infection in pregnancy)**

| Strategy                   | Syphilis antenatal screens | Women treated for syphilis | False positive screens | Intrauterine fetal demise | Preterm deliveries | Neonatal deaths | Congenital syphilis |
|----------------------------|----------------------------|----------------------------|------------------------|---------------------------|--------------------|-----------------|---------------------|
| Existing: single screen    | 725,891                    | 1,709                      | 1,451                  | 2,906.1                   | 54,240             | 1,447           | 43.2                |
| Alternative: repeat screen | 1,411,696                  | 3,163                      | 2,823                  | 2,904.3                   | 54,226             | 1,446           | 4.2                 |
| Difference                 | 685,805                    | 1,455                      | 1,371                  | -1.8                      | -13                | -0.9            | -39.0               |

**Table S17. Cost outcomes for Scenario 3 (0.00012 probability of syphilis infection in pregnancy)**

| Cost                       | Total           | Antenatal screening | Syphilis treatment (in pregnant women) | Perinatal costs |
|----------------------------|-----------------|---------------------|----------------------------------------|-----------------|
| Existing: single screen    | £ 1,777,764,124 | £ 9,697,904         | £ 536,669                              | £ 1,767,529,551 |
| Alternative: repeat screen | £ 1,787,402,601 | £ 18,860,259        | £ 993,521                              | £ 1,767,548,821 |
| Difference                 | £ 9,638,476     | £ 9,162,355         | £ 456,852                              | £ 19,270        |

**Table S18. Requirements to prevent one outcome for Scenario 3 (0.00012 probability of syphilis infection in pregnancy)**

| Outcome             | Cost        | Women screened in third trimester | Women treated for syphilis – TP and FP | Additional false positives |
|---------------------|-------------|-----------------------------------|----------------------------------------|----------------------------|
| Congenital syphilis | £247,284    | 17,595                            | 37                                     | 35                         |
| IUFD                | £5,332,625  | 379,431                           | 805                                    | 759                        |
| Neonatal death      | £11,063,507 | 787,200                           | 1,670                                  | 1,574                      |

TP, True positive; FP, False positive

Table S19. Short and long-term cost outcomes for Scenario 3 (higher syphilis incidence in pregnancy)

| Syphilis incidence<br>(new infections<br>between screens) |         | Screening<br>Strategy | Short-term costs | Pregnancy outcomes |          |                   |                        | Short-term<br>cost per CS<br>case<br>prevented | Lifetime<br>health and<br>social care<br>costs<br><br>ICER |
|-----------------------------------------------------------|---------|-----------------------|------------------|--------------------|----------|-------------------|------------------------|------------------------------------------------|------------------------------------------------------------|
| Probability (%)                                           |         |                       |                  | IUFD               | Preterm  | Neonatal<br>death | Congenital<br>syphilis |                                                |                                                            |
| 0.00003                                                   | (0.003) | Single                | £1,777,506,256   | 2,904.6            | 54,229.9 | 1,446.6           | 13.2                   |                                                |                                                            |
|                                                           |         | Repeat                | £1,787,361,768   | 2,904.1            | 54,226.5 | 1,446.4           | 3.4                    |                                                |                                                            |
|                                                           |         | Difference            | £9,855,513       | -0.5               | -3.4     | -0.2              | -9.7                   | £1,011,791                                     | £38,140                                                    |
| 0.00004                                                   | (0.004) | Single                | £1,777,534,908   | 2,904.8            | 54,231.0 | 1,446.7           | 16.5                   |                                                |                                                            |
|                                                           |         | Repeat                | £1,787,366,305   | 2,904.1            | 54,226.4 | 1,446.4           | 3.5                    |                                                |                                                            |
|                                                           |         | Difference            | £9,831,398       | -0.6               | -4.5     | -0.3              | -13.0                  | £756,892                                       | £11,171                                                    |
| 0.00005                                                   | (0.005) | Single                | £1,777,563,560   | 2,904.9            | 54,232.1 | 1,446.8           | 19.8                   |                                                |                                                            |
|                                                           |         | Repeat                | £1,787,370,842   | 2,904.2            | 54,226.4 | 1,446.4           | 3.6                    |                                                |                                                            |
|                                                           |         | Difference            | £9,807,283       | -0.8               | -5.7     | -0.4              | -16.2                  | £603,983                                       | Cost saving                                                |
| 0.00006                                                   | (0.006) | Single                | £1,777,592,212   | 2,905.1            | 54,233.1 | 1,446.9           | 23.2                   |                                                |                                                            |
|                                                           |         | Repeat                | £1,787,375,379   | 2,904.2            | 54,226.4 | 1,446.4           | 3.7                    |                                                |                                                            |
|                                                           |         | Difference            | £9,783,167       | -0.9               | -6.8     | -0.4              | -19.5                  | £502,056                                       | Cost saving                                                |
| 0.00007                                                   | (0.007) | Single                | £1,777,620,864   | 2,905.2            | 54,234.2 | 1,446.9           | 26.5                   |                                                |                                                            |
|                                                           |         | Repeat                | £1,787,379,916   | 2,904.2            | 54,226.4 | 1,446.4           | 3.8                    |                                                |                                                            |
|                                                           |         | Difference            | £9,759,052       | -1.1               | -7.9     | -0.5              | -22.7                  | £429,258                                       | Cost saving                                                |
| 0.00008                                                   | (0.008) | Single                | £1,777,649,516   | 2,905.4            | 54,235.3 | 1,447.0           | 29.9                   |                                                |                                                            |
|                                                           |         | Repeat                | £1,787,384,453   | 2,904.2            | 54,226.3 | 1,446.4           | 3.9                    |                                                |                                                            |
|                                                           |         | Difference            | £9,734,937       | -1.2               | -9.0     | -0.6              | -26.0                  | £374,662                                       | Cost saving                                                |

Table continued over the page.

Table S19. Continued from previous page.

| Syphilis incidence<br>(new infections<br>between screens) |         | Screening<br>Strategy | Short-term costs | Pregnancy outcomes |          |                   |                        | Short-term<br>cost per CS<br>case<br>prevented | Lifetime<br>health and<br>social care<br>costs<br><br>ICER |
|-----------------------------------------------------------|---------|-----------------------|------------------|--------------------|----------|-------------------|------------------------|------------------------------------------------|------------------------------------------------------------|
| Probability (%)                                           |         |                       |                  | IUFD               | Preterm  | Neonatal<br>death | Congenital<br>syphilis |                                                |                                                            |
| 0.00009                                                   | (0.009) | Single                | £1,777,678,168   | 2,905.6            | 54,236.4 | 1,447.1           | 33.2                   | £332,201                                       | Cost saving                                                |
|                                                           |         | Repeat                | £1,787,388,990   | 2,904.2            | 54,226.3 | 1,446.4           | 4.0                    |                                                |                                                            |
|                                                           |         | Difference            | £9,710,822       | -1.4               | -10.1    | -0.7              | -29.2                  |                                                |                                                            |
| 0.0001                                                    | (0.01)  | Single                | £1,777,706,820   | 2,905.7            | 54,237.5 | 1,447.2           | 36.5                   | £298,234                                       | Cost saving                                                |
|                                                           |         | Repeat                | £1,787,393,527   | 2,904.2            | 54,226.3 | 1,446.4           | 4.1                    |                                                |                                                            |
|                                                           |         | Difference            | £9,686,707       | -1.5               | -11.2    | -0.7              | -32.5                  |                                                |                                                            |
| 0.00011                                                   | (0.011) | Single                | £1,777,735,472   | 2,905.9            | 54,238.6 | 1,447.3           | 39.9                   | £270,443                                       | Cost saving                                                |
|                                                           |         | Repeat                | £1,787,398,064   | 2,904.3            | 54,226.3 | 1,446.5           | 4.1                    |                                                |                                                            |
|                                                           |         | Difference            | £9,662,592       | -1.7               | -12.4    | -0.8              | -35.7                  |                                                |                                                            |
| 0.00012                                                   | (0.012) | Single                | £1,777,764,124   | 2,906.1            | 54,239.7 | 1,447.3           | 43.2                   | £247,284                                       | Cost saving                                                |
|                                                           |         | Repeat                | £1,787,402,601   | 2,904.3            | 54,226.2 | 1,446.5           | 4.2                    |                                                |                                                            |
|                                                           |         | Difference            | £9,638,476       | -1.8               | -13.5    | -0.9              | -39.0                  |                                                |                                                            |

CS, congenital syphilis; ICER, IUFD, Intrauterine foetal demise; ICER, Incremental cost-effectiveness ratio. Lifetime costs and utilities were discounted at 3.5%.

<sup>1</sup>Lifetime health and social care costs adapted from a study of lifetime costs of cerebral palsy in Denmark [18]. The social care costs include specialised schooling, and after school care, support to parents, residential institutions, supervised workshops, day centre, and other adult support services.

**Table S20. Cost per screen needed to meet NICE ICER thresholds (Scenario 7)**

| Threshold of interest                                 | Per screen cost required to achieve threshold | Incremental cost-effectiveness ratio (ICER) | Additional short-term cost (repeat screen vs. single screen) | Cost per CS case avoided (short-term cost) |
|-------------------------------------------------------|-----------------------------------------------|---------------------------------------------|--------------------------------------------------------------|--------------------------------------------|
| Long-term health and social care costs and utilities  |                                               |                                             |                                                              |                                            |
| £100k ICER threshold                                  | £11.79                                        | £99,877.04                                  | £8,810,149                                                   | £1,596,738                                 |
| £30k ICER threshold                                   | £6.46                                         | £29,884.61                                  | £5,154,808                                                   | £934,250                                   |
| £20k ICER threshold                                   | £5.70                                         | £19,904.45                                  | £4,633,596                                                   | £839,786                                   |
| Per screen cost half the baseline value (used in DSA) | £6.68                                         | £32,773.60                                  | £5,305,685                                                   | £961,594                                   |

CS, congenital syphilis; DSA, deterministic sensitivity analysis. ICERs were calculated using the additional lifetime health and social care cost of CS (£651,387) as used in Scenario 1 adapted from a study of lifetime costs of cerebral palsy in Denmark [18]. Per screen cost was calculated to the nearest penny. Lifetime costs and utilities were discounted at 3.5%.

## References

- 1 Kingston M, French P, Higgins S, *et al.* UK national guidelines on the management of syphilis 2015. *Int J STD AIDS* 2016;**27**:421–46. doi:10.1177/0956462415624059
- 2 Qin J, Yang T, Xiao S, *et al.* Reported Estimates of Adverse Pregnancy Outcomes among Women with and without Syphilis: A Systematic Review and Meta-Analysis. *PLoS ONE* 2014;**9**:e102203. doi:10.1371/journal.pone.0102203
- 3 Townsend CL, Francis K, Peckham CS, *et al.* Syphilis screening in pregnancy in the United Kingdom, 2010-2011: a national surveillance study. *BJOG* 2017;**124**:79–86. doi:10.1111/1471-0528.14053
- 4 Simms I, Tookey PA, Goh BT, *et al.* The incidence of congenital syphilis in the United Kingdom: February 2010 to January 2015. *BJOG* 2017;**124**:72–7. doi:10.1111/1471-0528.13950
- 5 MBRRACE-UK. Perinatal Mortality Surveillance Report. UK Perinatal Deaths for Births from January to December 2016. [www.npeu.ox.ac.uk](http://www.npeu.ox.ac.uk) (Accessed 12 Mar 2020).
- 6 NHS Digital. NHS Maternity Statistics, England 2017-18. 2018. <https://digital.nhs.uk/data-and-information/publications/statistical/nhs-maternity-statistics/2017-18> (Accessed 12 Mar 2020).
- 7 Northern Ireland Maternity System data provided on request from the Public Health Agency (Health Intelligence Unit), Northern Ireland. July 2018.
- 8 Data provided on request by ISD NHS Scotland's Population Health: Maternity, Sexual Health and Unintentional Injuries Team. July 2018.
- 9 Data provided on request by the Welsh Government's Knowledge and Analytic Services, Health & Social Services Group. July 2018.
- 10 Pathway Analytics. Integrated Sexual Health Tariff - London ISHT 2017/2018. <https://www.pathwayanalytics.com/> (Accessed 12 Mar 2020).
- 11 Curtis, L. & Burns, A. (2018) Unit Costs of Health and Social Care 2018, Personal Social Services Research Unit, University of Kent, Canterbury. <https://www.pssru.ac.uk/project-pages/unit-costs/unit-costs-2018/> (Accessed 12 Mar 2020).

- 12 Campbell H, Kurinczuk J, Heazell A, *et al.* Healthcare and wider societal implications of stillbirth: a population-based cost-of-illness study. *BJOG: Int J Obstet Gy* 2018;**125**:108–17. doi:10.1111/1471-0528.14972
- 13 NHS Improvement. 2017/18 National Prices and National tariff workbook. 2017. <https://improvement.nhs.uk/resources/national-tariff-1719/> (Accessed 12 Mar 2020).
- 14 NHS Improvement. Non mandatory currencies and prices 2017/2018. 2017. <https://improvement.nhs.uk/resources/national-tariff-1719/> (Accessed 12 Mar 2020).
- 15 BNF: British National Formulary - NICE. <https://bnf.nice.org.uk/> (Accessed 12 Mar 2020).
- 16 WHO Child Growth Standards. [http://www.who.int/childgrowth/standards/weight\\_for\\_age/en/](http://www.who.int/childgrowth/standards/weight_for_age/en/) (Accessed 12 Mar 2020).
- 17 Owusu-Edusei KJ, Introcaso CE, Chesson HW. Hospitalization Cost of Congenital Syphilis Diagnosis From Insurance Claims Data in the United States. *Sexually Transmitted Diseases* 2013;**40**:226. doi:10.1097/OLQ.0b013e31827c5b9f
- 18 Kruse M, Michelsen SI, Flachs EM, *et al.* Lifetime costs of cerebral palsy. *Developmental Medicine & Child Neurology* 2009;**51**:622–8. doi:10.1111/j.1469-8749.2008.03190.x
- 19 ONS. Analysis of population estimates tool - Office for National Statistics. 2019. <https://www.ons.gov.uk/peoplepopulationandcommunity/populationandmigration/populationestimates/datasets/analysisofpopulationestimatestool> (Accessed 12 Mar 2020).
- 20 Welsh Government, Statistics for Wales. Maternity statistics, Wales 2017-18. Welsh Government 2018. <https://gov.wales/maternity-statistics-april-2017-march-2018> (Accessed 12 Mar 2020).
